# Supplementary material for: Iron-Catalyzed Cleavage of Allene C=C Double Bond
Source: Research Square preprint supplement (doi:10.21203/rs.3.rs-5543027/v1), 2025-12-08

**Supplementary Information**

**Iron-Catalyzed Cleavage of Allene C=C Double Bond**

Zhaoshan Wang,1,‡ Qi Zhang,1,‡ Huiying Liu,1,‡ Zhigang Ma,2,* Xiancheng Qiu,1 Song Jiang,1 Jing Zhao,1 Xinxin Wu,1,* Chen Zhu3

aKey Laboratory of Organic Synthesis of Jiangsu Province, College of Chemistry, Chemical Engineering and Materials Science, Soochow University, 199 Ren-Ai Road, Suzhou, Jiangsu 215123, China

bTandemAI, Building 6, No. 111 Wusongjiang Road, Wuzhong District, Suzhou, Jiangsu 215124, China

cFrontiers Science Center for Transformative Molecules and Shanghai Key, Laboratory for Molecular Engineering of Chiral Drugs Department, Shanghai Jiao Tong University, Shanghai 200240 China

**Contents**

| 1. General experimental details |  | S3 |
| --- | --- | --- |
| 2. Optimization of the reaction conditions |  | S3 |
| 3. General procedure for the synthesis of silyl-allenes |  | S3 |
| 4. General procedures for the synthesis of products |  | S12 |
| 5. Scaled-up preparation |  | S18 |
| 6. Synthetic transformations |  | S18 |
| 7. Mechanism studies |  | S21 |
| 8. DFT calculations |  | S23 |
| 9. References |  | S31 |
| 10. NMR spectra |  | S32 |

**1. General Experimental Details**

All reactions were maintained under a nitrogen atmosphere unless otherwise stated. Commercially available reagents were used without further purification. Infrared (FT-IR) spectra were recorded on a BRUKER VERTEX 70, νmax in cm-1. 1H-NMR spectra were recorded on a BRUKER AVANCE III HD (400 MHz) spectrometer. Chemical shifts are reported in ppm from tetramethylsilane with the solvent resonance as internal standard (CDCl3: δ 7.26). Data are reported as follows: chemical shift, multiplicity (s = singlet, d = doublet, t = triplet, q = quadruplet, m = multiplet), coupling constants (Hz) and integration. 13C-NMR spectra were recorded on a BRUKER AVANCE III HD (100 MHz) spectrometer with complete proton decoupling. Chemical shifts are reported in ppm from tetramethylsilane with the solvent resonance as the internal standard (CDCl3: δ 77.16). 19F-NMR spectra were recorded on a BRUKER AVANCE III HD (376 MHz) spectrometer. Mass spectra were measured with an Agilent Technologies 6120 Quadrupole LC/MS. High resolution mass spectrometry (HRMS) were measured with a GCT PremierTM and BRUKER micrOTF-Q III.

**2. Optimization of the reaction conditions**

| Entry | [Fe] (x mol%) | Volume (mL) | | Yield (%) | |
| --- | --- | --- | --- | --- | --- |
| 1[a] | 20 | 2.0 | 23 | |
| 2[b] | 20 | 2.0 | Trace | |
| **3** | **10** | **2.0** | **78** | |
| 4 | 20 | 2.0 | 77 | |
| 5 | 30 | 2.0 | 76 | |
| 6 | 10 | 1.0 | 73 | |
| 7 | 10 | 3.0 | 68 | |
| 8 | 10 | 4.0 | 61 | |
| 9 | 10 | 5.0 | 60 | |

Reaction conditions: **1a-3** (0.2 mmol) stirred under air for 1.5 h, Fe(OTf)2 (x mol%), and EtOAc (2 mL) were stirred for 12 h under N2; isolated yields. [a] one-step method: **1a** (0.2 mmol), Fe(OTf)2 (20 mol%), and EtOAc (2 mL) were stirred for 16 h under air. [b] one-step method: **1a** (0.2 mmol), Fe(OTf)2 (20 mol%), and EtOAc (2 mL) were stirred for 16 h under N2.

**3. General procedure for the synthesis of silyl-allenes**

The starting materials allenes were prepared based on the reported procedure.1 Allenes **1a-1q**, and **1ad** were prepared according to the method A. Allene **1r-1ac** was prepared according to the method B.

**3.1 Method A**

To a solution of **S1** (34.9 g, 20 mmol) and imidazole (80 mL, 22 mmol) in DCM (60 mL), chlorosilane (24 mmol) were added dropwise at 0 °C and the resulting mixture was stirred at room temperature for 12 h. After the mixture was quenched with water, the volatile components were removed under reduced pressure. The residue was extracted with ethyl acetate. The combined organic extracts were washed with brine, dried over magnesium sulfate, filtered, and concentrated under reduced pressure. The residual oil was purified by distillation to afford **S2** as a colorless oil.

To a solution of **S2** (26.2 g, 20 mmol) in THF (15 mL), N,N,N’,N’-tetramethylethylenediamine (40.0 mL, 40 mmol), 2.5 M n-butyllithium in hexane (16 mL, 40 mmol) were added dropwise at -78 °C. After stirring at -78 °C for 1 h, TFA (9.0 mL, 20 mmol) was added. The reaction mixture was quenched with saturated aqueous ammonium chloride, and the resulting mixture was extracted with ethyl acetate. The combined organic extracts were washed with brine, dried over magnesium sulfate, filtered, and concentrated under reduced pressure. The residual oil was purified by column chromatography to afford **S3** as a yellow oil.

To a solution of **S3** (23.0 g, 15 mmol) in toluene (30 mL), Et3N (26.4 g, 30 mmol) and ethanesulfonyl chloride (13.8 mL, 30 mmol) were added at 0 °C. After stirring for 3 h, the reaction mixture was quenched with water. After separation of the phases, the aqueous layer was extracted with ethyl acetate. The combined organic extracts were washed with brine, dried over magnesium sulfate, filtered, and concentrated under reduced pressure. The residual oil was purified by column chromatography to afford **S4**.

To a solution of copper cyanide/ cuprous bromide (6 mmol) in THF (8 mL), tri-n-butylphosphine (1.5 mL, 6 mmol) was added at 0 °C, and the resulting mixture was stirred at room temperature for 5 min. To the resulting suspension, alkyllithium/ Grignard reagent (12 mmol) was added at -78 °C via a cannula and the mixture was stirred for 5 min at -78 °C. Then, a solution of **S4** (3 mmol) in THF (100 mL) was added at -78 ℃ and stirred for 5 min. Di-t-butylhydroxytoluene (6 mol%) was added for preventing product from being auto-oxidized. The reaction mixture was quenched with saturated aqueous ammonium chloride. After separation of the phases, the aqueous layer was extracted with hexane. The combined organic extracts were washed with brine, dried over magnesium sulfate, filtered, and concentrated under reduced pressure. The residual oil was purified by column chromatography (silica gel, hexane) to afford silyl-allene as a colorless oil.

**3.2 Method B**

To a solution of copper iodide (5 mol%) in THF (20 mL), benzoyl chloride **S5** (10 mmol, 1.0 equiv.) was added at -78 °C. The new-produced Grignard reagent was added dropwise, and the resulting mixture was stirred at -78 °C for 1 h. After the reaction was warmed to room temperature, the mixture was stirred for an additional 12 h. The reaction mixture was quenched with saturated aqueous ammonium chloride. After separation of the phases, the aqueous layer was extracted with EtOAc. The combined organic extracts were washed with brine, dried over magnesium sulfate, filtered, and concentrated under reduced pressure. The residual oil was purified by column chromatography (silica gel, hexane) to afford ketone **S6**.

To a solution of **S6** (6 mmol) in THF (36 mL) at 0 °C, the Grignard reagent (9 mmol) was added dropwise. The mixture was stirred for 3 h at rt after 10 min stirring at 0 °C. Then acetic anhydride (12 mmol) was added at 0 °C, and the resulting mixture was stirred for extra 1 h at rt. The reaction mixture was quenched with saturated aqueous ammonium chloride. After separation of the phases, the aqueous layer was extracted with EtOAc. The combined organic extracts were washed with brine, dried over magnesium sulfate, filtered, and concentrated under reduced pressure. The residual oil was purified by column chromatography (silica gel, hexane) to afford **S7**.

To a solution of copper cyanide (3 mmol) in THF (20 mL) at -78 °C, the new-produced lithium silicon reagent (2.2 mmol) was added dropwise, and the mixture was stirred for 1 h. **S7** (2 mmol) was dissolved in THF (2 mL) and added dropwise. The resulting mixture was stirred for 2 h at -78 °C. The reaction mixture was quenched with saturated aqueous ammonium chloride. After separation of the phases, the aqueous layer was extracted with EtOAc. The combined organic extracts were washed with brine, dried over magnesium sulfate, filtered, and concentrated under reduced pressure. The residual oil was purified by column chromatography (silica gel, hexane) to afford silyl-allene.

**1a**: colorless oil. Purification by flash column chromatography on silica gel (eluent: Petroleum ether). 1H NMR (400 MHz, CDCl3) δ 4.82-4.77 (m, 1H), 1.95-1.86 (m, 2H), 1.64 (d, *J* = 4.0 Hz, 3H), 1.58-1.54 (m, 1H), 1.31-1.27 (m, 2H), 0.90 (s, 9H), 0.89-0.86 (m, 6H), 0.01 (s, 3H), 0.01 (s, 3H). 13C NMR (100 MHz, CDCl3) δ 209.8, 91.7, 79.3, 37.1, 31.2, 27.9, 26.5, 22.8, 22.7, 18.3, 17.0, -5.4, -5.5. FT-IR: ν (cm-1) 2954, 2930, 1250, 828, 776, 679. HRMS [ESI] calcd for C15H30NaSi [M+Na]+ 261.2009, found 261.2008.

**1b**: colorless oil. Purification by flash column chromatography on silica gel (eluent: Petroleum ether). 1H NMR (400 MHz, CDCl3) δ 4.77-4.73 (m, 1H), 1.95-1.87 (m, 2H), 1.64 (d, *J* = 4.0 Hz, 3H), 1.58-1.53 (m, 1H), 1.34-1.28 (m, 2H), 1.04-1.05 (m, 21H), 0.89 (d, *J* = 1.2 Hz, 3H), 0.88 (d, *J* = 0.8 Hz, 3H). 13C NMR (100 MHz, CDCl3) δ 210.3, 90.9, 75.6, 37.1, 31.4, 28.0, 22.8, 22.6, 18.7, 18.2, 11.5. FT-IR: ν (cm-1) 2943, 2866, 1464, 882, 676, 661. HRMS [ESI] calcd for C18H36NaSi [M+Na]+ 303.2478, found 303.2475.

**1c**: colorless oil. Purification by flash column chromatography on silica gel (eluent: Petroleum ether). 1H NMR (400 MHz, CDCl3) δ 4.78-4.73 (m, 1H), 1.97-1.89 (m, 2H), 1.64 (d, *J* = 4.0 Hz, 3H), 1.42-1.33 (m, 4H), 1.06-1.05 (m, 21H), 0.90 (t, *J* = 7.2 Hz, 3H). 13C NMR (100 MHz, CDCl3) δ 210.4, 90.7, 75.5, 33.3, 30.2, 22.7, 18.7, 18.2, 14.2, 11.5. FT-IR: ν (cm-1) 2943, 2865, 1463, 883, 457. HRMS [ESI] calcd for C17H34NaSi [M+Na]+ 289.2322, found 289.2320.

**1d**: colorless oil. Purification by flash column chromatography on silica gel (eluent: Petroleum ether). 1H NMR (400 MHz, CDCl3) δ 4.82-4.78 (m, 1H), 1.93-1.89 (m, 2H), 1.66-1.61 (d, *J* = 4.0 Hz, 3H), 1.39-1.34 (m, 4H), 0.91-0.89 (m, 12H), 0.02 (s, 3H), 0.01 (s, 3H). 13C NMR (100 MHz, CDCl3) δ 209.9, 91.6, 79.2, 33.1, 30.2, 26.5, 22.7, 18.3, 17.0, 14.2, -5.4, -5.4. FT-IR: ν (cm-1) 2955, 2929, 1944, 1249, 827. HRMS [ESI] calcd for C14H28NaSi [M+Na]+ 247.1852, found 247.1850.

**1e**: colorless oil. Purification by flash column chromatography on silica gel (eluent: Petroleum ether). 1H NMR (400 MHz, CDCl3) δ 4.78-4.74 (m, 1H), 1.92-1.89 (m, 2H), 1.64 (d, *J* = 3.6 Hz, 3H), 1.39-1.33 (m, 4H), 0.95 (t, *J* = 8.0 Hz, 9H), 0.90 (t, *J* = 7.2 Hz, 3H), 0.60-0.54 (m, 6H). 13C NMR (100 MHz, CDCl3) δ 209.9, 91.2, 77.9, 33.2, 30.2, 22.7, 18.3, 14.2, 7.5, 4.1. FT-IR: ν (cm-1) 2955, 2874, 1459, 1015, 725. HRMS [ESI] calcd for C14H28NaSi [M+Na]+ 247.1852, found 247.1853.

**1f**: colorless oil. Purification by flash column chromatography on silica gel (eluent: Petroleum ether). 1H NMR (400 MHz, CDCl3) δ 7.58-7.56 (m, 2H), 7.38-7.35 (m, 3H), 5.02-4.97 (m, 1H), 1.96-1.92 (m, 2H), 1.67 (d, *J* = 4.0 Hz, 3H), 1.39-1.32 (m, 4H), 0.90 (t, *J* = 7.2 Hz, 3H), 0.35 (s, 6H). 13C NMR (100 MHz, CDCl3) δ 210.3, 139.4, 133.9, 129.1, 127.8, 92.6, 80.6, 33.0, 30.1, 22.6, 18.2, 14.1, -1.9, -2.0. FT-IR: ν (cm-1) 2957, 2930, 1943, 1247, 1113, 819. HRMS [ESI] calcd for C16H24NaSi [M+Na]+ 267.1539, found 267.1531.

**1g**: colorless oil. Purification by flash column chromatography on silica gel (eluent: Petroleum ether). 1H NMR (400 MHz, CDCl3) δ 4.76-4.73 (m, 1H), 1.97-1.84 (m, 2H), 1.63 (d, *J* = 3.6 Hz, 3H), 1.47-1.42 (m, 2H), 1.06-1.05 (m, 21H), 0.92 (t, *J* = 7.2 Hz, 3H). 13C NMR (100 MHz, CDCl3) δ 210.4, 90.5, 75.3, 35.8, 21.1, 18.7, 18.1, 14.1, 11.4. FT-IR: ν (cm-1) 2940, 2865, 1943, 1652, 1201, 1133. HRMS [ESI] calcd for C16H32NaSi [M+Na]+ 275.2165, found 275.2159.

**1h**: colorless oil. Purification by flash column chromatography on silica gel (eluent: Petroleum ether). 1H NMR (400 MHz, CDCl3) δ 4.78-4.74 (m, 1H), 3.38 (t, *J* = 6.4 Hz, 2H), 3.31 (s, 3H), 2.04-1.92 (m, 2H), 1.73-1.68 (m, 2H), 1.63 (d, *J* = 4.0 Hz, 3H), 1.04-1.03 (m, 21H). 13C NMR (100 MHz, CDCl3) δ 210.1, 90.1, 76.0, 72.7, 58.6, 30.0, 27.9, 19.1, 18.6, 18.7, 11.4. FT-IR: ν (cm-1) 2941 2891, 1943, 1462, 1119, 881. HRMS [ESI] calcd for C17H34NaOSi [M+Na]+ 305.2271, found 305.2271.

**1i**: colorless oil. Purification by flash column chromatography on silica gel (eluent: Petroleum ether). d.r. = 1:1, 1H NMR (400 MHz, CDCl3) δ 4.78-4.68 (m, 1H, two isomers), 2.07-1.98 (m, 0.5H, one isomer), 1.94-1.85 (m, 0.5H, one isomer), 1.82-1.77 (m, 0.5H, one isomer), 1.71-1.66 (m, 0.5H, one isomer), 1.64 (d, *J* = 1.6 Hz, 1.5H, one isomer), 1.63 (d, *J* = 1.6 Hz, 1.5H, one isomer), 1.58-1.46 (m, 1.5H, one isomer), 1.46-1.34 (m, 1.5H, one isomer), 1.09-1.03 (m, 21H, two isomers), 0.90-0.87 (m, 6H, two isomers). 13C NMR (100 MHz, CDCl3) δ 211.3 (one isomer) & 211.1 (one isomer), 89.4 (one isomer) & 89.2 (one isomer), 74.8 (one isomer) & 74.7 (one isomer), 41.4 (one isomer) & 41.1 (one isomer), 34.9 (one isomer) & 34.2 (one isomer), 33.2 (one isomer) & 32.9 (one isomer), 29.8 (one isomer) & 29.4 (one isomer), 19.5 (one isomer) & 19.3 (one isomer), 18.7 (one isomer) & 18.7 (one isomer), 18.3 (one isomer) & 18.2 (one isomer), 11.5 (overlap, two isomers). FT-IR: ν (cm-1) 2942, 2866, 1462, 964, 791. HRMS [ESI] calcd for C18H36NaSi [M+Na]+ 303.2478, found 303.2479.

**1j**: colorless oil. Purification by flash column chromatography on silica gel (eluent: Petroleum ether). 1H NMR (400 MHz, CDCl3) δ 4.78-4.73 (m, 1H), 1.97-1.87 (m, 2H), 1.64 (d, *J* = 4.0 Hz, 3H), 1.45-1.39 (m, 2H), 1.32-1.28 (m, 4H), 1.06-1.05 (m, 21H), 0.89 (t, *J* = 2.8 Hz, 3H). 13C NMR (100 MHz, CDCl3) δ 210.2, 90.6, 75.3, 33.4, 31.8, 27.5, 22.6, 18.5, 18.0, 14.1, 11.3. FT-IR: ν (cm-1) 2942, 2865, 1463, 882, 676. HRMS [ESI] calcd for C18H37Si [M+H]+ 281.2659, found 281.2655.

**1k**: colorless oil. Purification by flash column chromatography on silica gel (eluent: Petroleum ether). 1H NMR (400 MHz, CDCl3) δ 4.77-4.72 (m, 1H), 1.95-1.89 (m, 2H), 1.70-1.67 (m, 4H), 1.63 (d, *J* = 4.0 Hz, 3H), 1.33-1.20 (m, 9H), 1.05-1.04 (m, 21H). 13C NMR (100 MHz, CDCl3) δ 210.3, 90.9, 75.5, 37.6, 35.6, 33.6, 33.4, 30.9, 26.9, 26.6, 18.7, 18.2, 11.4. FT-IR: ν (cm-1) 2921, 2851, 1448, 918, 677. HRMS [ESI] calcd for C21H40NaSi [M+Na]+ 343.2791, found 343.2790.

**1l**: colorless oil. Purification by flash column chromatography on silica gel (eluent: Petroleum ether). 1H NMR (400 MHz, CDCl3) δ 5.87-5.76 (m, 1H), 5.02-4.97 (m, 1H), 4.95-4.91 (m, 1H), 4.78-4.71 (m, 1H), 2.07-2.02 (m, 2H), 1.97-1.85 (m, 2H), 1.64 (d, *J* = 3.6 Hz, 3H), 1.43-1.36 (m, 4H), 1.28 (m, 10H), 1.06-1.05 (m, 21H). 13C NMR (100 MHz, CDCl3) δ 210.3, 139.4, 114.2, 90.7, 75.4, 34.0, 33.6, 29.7, 29.7, 29.7, 29.6, 29.3, 29.1, 27.9, 18.7, 18.7, 18.1, 11.4. FT-IR: ν (cm-1) 2924, 2862, 1942, 1462, 1366, 882. HRMS [ESI] calcd for C24H46Si [M]+ 362.3369, found 362.3368.

**1m**: colorless oil. Purification by flash column chromatography on silica gel (eluent: Petroleum ether). 1H NMR (400 MHz, CDCl3) δ 4.99-4,84 (m, 1H), 1.98-1.89 (m, 4H), 1.43-1.32 (m, 4H), 1.07-1.06 (m, 21H), 1.02 (t, *J* = 7.2 Hz, 3H), 0.90 (t, *J* = 7.2 Hz, 3H). 13C NMR (100 MHz, CDCl3) δ 209.6, 97.2, 77.5, 31.7, 30.3, 24.9, 22.8, 18.8, 14.2, 12.6, 11.6. FT-IR: ν (cm-1) 2941, 2865, 1462, 882, 661. HRMS [ESI] calcd for C18H36NaSi [M+Na]+ 303.2478, found 303.2473.

**1n**: colorless oil. Purification by flash column chromatography on silica gel (eluent: Petroleum ether). 1H NMR (400 MHz, CDCl3) δ 4.84-4.80 (m, 1H), 2.00-1.84 (m, 4H), 1.45-1.31 (m, 8H), 1.10-1.03 (m, 21H), 0.90 (t, *J* = 7.2 Hz, 6H). 13C NMR (100 MHz, CDCl3) δ 209.9, 95.5, 76.8, 31.7, 30.3, 22.8, 18.7, 14.2, 11.6. FT-IR: ν (cm-1) 2957, 2865, 1463, 882, 676. HRMS [ESI] calcd for C20H40NaSi [M+Na]+ 331.2791, found 331.2795.

**1o**: colorless oil. Purification by flash column chromatography on silica gel (eluent: Petroleum ether). 1H NMR (400 MHz, CDCl3) δ 4.87 (q, *J* = 3.6 Hz, 1H), 2.05-1.96 (m, 2H), 1.50-1.46 (m, 2H), 1.40-1.29 (m, 3H), 1.07-1.06 (m, 21H), 0.91 (t, *J* = 7.2 Hz, 3H), 0.64-0.57 (m, 2H), 0.41-0.32 (m, 2H). 13C NMR (100 MHz, CDCl3) δ 209.2, 98.5, 78.7, 32.1, 30.5, 22.8, 18.7, 14.2, 12.0, 11.6, 6.3, 5.7. FT-IR: ν (cm-1) 2942, 2865, 1463, 882, 675. HRMS [ESI] calcd for C19H36NaSi [M+Na]+ 315.2478, found 315.2470.

**1p**: colorless oil. Purification by flash column chromatography on silica gel (eluent: Petroleum ether). 1H NMR (400 MHz, CDCl3) δ 4.94 (q, *J* = 4.0 Hz, 1H), 2.81-2.73 (m, 1H), 2.08-2.02 (m, 2H), 1.95-1.79 (m, 6H), 1.39-1.31 (m, 4H), 1.07-1.05 (m, 21H), 0.89 (t, *J* = 7.2 Hz, 3H). 13C NMR (100 MHz, CDCl3) δ 209.0, 100.4, 78.6, 36.9, 30.4, 29.9, 28.3, 28.0, 22.9, 18.8, 18.2, 14.2, 11.6. FT-IR: ν (cm-1) 2941, 2864, 1937, 1463, 882, 661. HRMS [ESI] calcd for C20H38NaSi [M+Na]+ 329.2635, found 329.2636.

**1q**: colorless oil. Purification by flash column chromatography on silica gel (eluent: Petroleum ether). 1H NMR (400 MHz, CDCl3) δ 7.39-7.37 (m, 2H), 7.33-7.29 (m, 2H), 7.16-7.13 (m, 1H), 5.33 (t, *J* = 3.6 Hz, 1H), 2.43-2.38 (m, 2H), 1.71-1.65 (m, 1H), 1.50-1.45 (m, 2H), 1.11-1.07 (m, 21H), 0.95 (dd, *J* = 6.4, 5.6 Hz, 6H). 13C NMR (100 MHz, CDCl3) δ 211.3, 137.5, 128.4, 125.7, 125.6, 98.2, 80.8, 37.6, 28.2, 27.3, 22.8, 22.7, 18.7, 18.7, 11.7. FT-IR: ν (cm-1) 2942, 2865, 1921, 1462, 882. HRMS [EI] calcd for C23H38Si [M]+ 342.2743, found 342.2740.

**1r**: yellow oil. Purification by flash column chromatography on silica gel (eluent: Petroleum ether). 1H NMR (400 MHz, CDCl3) δ 7.62-7.59 (m, 2H), 7.39-7.36 (m, 5H), 7.33-7.30 (m, 2H), 7.19-7.16 (m, 1H), 5.53 (t, *J* = 3.6 Hz, 1H), 2.43-2.37 (m, 2H), 1.70-1.63 (m, 1H), 1.44-1.39 (m, 2H), 0.93 (dd, *J* = 6.4, 2.0 Hz, 6H), 0.43 (d, *J* = 5.6 Hz, 6H). 13C NMR (100 MHz, CDCl3) δ 211.5, 138.6, 137.2, 133.9, 129.3, 128.5, 128.0, 126.0, 125.6, 99.9, 85.3, 37.5, 28.1, 27.0, 22.8, 22.7, -1.9, -1.9. FT-IR: ν (cm-1) 2955, 1385, 819, 697, 432. HRMS [ESI] calcd for C22H28NaSi [M+Na]+ 343.1852, found 343.1849.

**1s**: yellow oil. Purification by flash column chromatography on silica gel (eluent: Petroleum ether). 1H NMR (400 MHz, CDCl3) δ 7.66-7.63 (m, 2H), 7.43-7.40 (m, 3H), 7.31-7.29 (m, 2H), 7.18-7.16 (m, 2H), 5.55 (t, *J* = 3.6 Hz, 1H), 2.44-2.40 (m, 2H), 2.38 (s, 3H), 1.72-1.67 (m, 1H), 1.48-1.42 (m, 2H), 0.98 (dd, *J* = 6.4, 2.0 Hz, 6H), 0.46 (d, *J* = 5.2 Hz, 6H). 13C NMR (100 MHz, CDCl3) δ 211.6, 138.7, 135.6, 134.1, 133.9, 129.3, 129.2, 128.0, 125.1, 99.7, 85.2, 37.5, 28.1, 27.1, 22.8, 22.7, 21.2, -1.9, -1.9. FT-IR: ν (cm-1) 2955, 1932, 1244, 816, 730. HRMS [ESI] calcd for C23H30NaSi [M+Na]+ 357.2009, found 357.2002.

**1t**: yellow oil. Purification by flash column chromatography on silica gel (eluent: Petroleum ether). 1H NMR (400 MHz, CDCl3) δ 7.61-7.58 (m, 2H), 7.40-7.38 (m, 3H), 7.32-7.28 (m, 2H), 7.03-6.98 (m, 2H), 5.53 (t, *J* = 3.6 Hz, 1H), 2.40-2.34 (m, 2H), 1.70-1.63 (m, 1H), 1.43-1.37 (m, 2H), 0.95 (dd, *J* = 6.4, 1.6 Hz, 6H), 0.43 (d, *J* = 4.8 Hz, 6H). 13C NMR (100 MHz, CDCl3) δ 211.4, 161.4(d, *J*C-F = 243.4 Hz), 138.5, 133.8, 133.1 (d, *J*C-F = 3.0 Hz), 129.4, 128.0, 126.9 (d, *J*C-F = 7.8 Hz), 115.3 (d, *J*C-F = 21.2 Hz), 99.2, 85.6, 37.4, 28.1, 27.2, 22.7, 22.7, -1.9, -2.0. 19F NMR (377 MHz, CDCl3) δ -117.4. FT-IR: ν (cm-1) 2955, 1922, 1507, 833, 730. HRMS [ESI] calcd for C22H27FNaSi [M+Na]+ 361.1758, found 361.1755.

**1u**: yellow oil. Purification by flash column chromatography on silica gel (eluent: Petroleum ether). 1H NMR (400 MHz, CDCl3) δ 7.63-7.60 (m, 2H), 7.43-7.39 (m, 3H), 7.29 (s, 4H), 5.57 (t, *J* = 4.0 Hz, 1H), 2.41-2.35 (m, 2H), 1.72-1.65 (m, 1H), 1.45-1.39 (m, 2H), 0.97 (dd, *J* = 6.8, 2.0 Hz, 6H), 0.45 (d, *J* = 4.8 Hz, 6H). 13C NMR (100 MHz, CDCl3) δ 211.3, 138.4, 135.9, 133.8, 131.5, 129.4, 128.6, 128.0, 126.8, 99.2, 85.8, 37.4, 28.1, 27.0, 22.7, 22.7, -1.9, -2.0. FT-IR: ν (cm-1) 2955, 1923, 1490, 820, 753. HRMS [ESI] calcd for C22H27ClNaSi [M+Na]+ 377.1463, found 377.1460.

**1v**: Purification by flash column chromatography on silica gel (eluent: Petroleum ether). 1H NMR (400 MHz, CDCl3) δ 7.58-7.56 (m, 2H), 7.42-7.37 (m, 5H), 7.21-7.19 (m, 2H), 5.51 (t, *J* = 3.6 Hz, 1H), 2.37-2.31 (m, 2H), 1.68-1.61 (m, 1H), 1.41-1.35 (m, 2H), 0.93(dd, *J* = 6.8, 1.6 Hz, 6H), 0.42 (d, *J* = 5.2 Hz, 6H). 13C NMR (100 MHz, CDCl3) δ 211.2, 138.3, 136.4, 133.8, 131.5, 129.4, 128.0, 127.2, 119.6, 99.2, 85.9, 37.4, 28.1, 26.9, 22.7, 22.7, -1.9, -2.0. FT-IR: ν (cm-1) 2955, 1921, 1486, 816, 756. HRMS [ESI] calcd for C22H27BrNaSi [M+Na]+ 421.0958, found 421.0951.

**1w**: yellow oil. Purification by flash column chromatography on silica gel (eluent: Petroleum ether). 1H NMR (400 MHz, CDCl3) δ 7.61-7.55 (m, 4H), 7.39-7.36 (m, 3H), 7.09-7.05 (m, 2H), 5.51 (t, *J* = 3.6 Hz, 1H), 2.35-2.29 (m, 2H), 1.66-1.60 (m, 1H), 1.39-1.33 (m, 2H), 0.92 (dd, *J* = 6.8, 2.0 Hz, 6H), 0.40 (d, *J* = 4.8 Hz, 6H). 13C NMR (100 MHz, CDCl3) δ 211.1, 138.3, 137.5, 137.0, 133.8, 129.4, 128.0, 127.5, 99.3, 90.8, 85.9, 37.4, 28.1, 26.8, 22.7, 22.7, -1.9, -2.0. FT-IR: ν (cm-1) 2954, 1920, 1002, 816, 730. HRMS [ESI] calcd for C22H27INaSi [M+Na]+ 469.0819, found 469.0811.

**1x**: yellow oil. Purification by flash column chromatography on silica gel (eluent: Petroleum ether). 1H NMR (400 MHz, CDCl3) δ 7.61-7.58 (m, 2H), 7.56-7.54 (m, 2H), 7.45-7.43 (m, 2H), 7.41-7.37 (m, 3H),5.59 (t, *J* = 3.6 Hz, 1H), 2.42-2.36 (m, 2H), 1.70-1.63 (m, 1H), 1.43-1.37 (m, 2H), 0.95 (dd, *J* = 6.4, 2.0 Hz, 6H), 0.44 (d, *J* = 5.6 Hz, 6H). 13C NMR (100 MHz, CDCl3) δ 211.4, 141.4, 138.1, 133.8, 129.5, 128.1, 127.8 (q, *J*C-F = 32.0 Hz), 125.6, 125.4 (q, *J*C-F = 3.7 Hz), 124.6 (q, *J*C-F = 270.0 Hz), 99.3, 86.0, 37.4, 28.1, 26.9, 22.7, 22.7, -1.9, -2.0. 19F NMR (377 MHz, CDCl3) δ -62.3. FT-IR: ν (cm-1) 2955, 1385, 819, 697, 432. HRMS [ESI] calcd for C23H27F3NaSi [M+Na]+ 411.1726, found 411.1724.

**1y**: yellow oil. Purification by flash column chromatography on silica gel (eluent: Petroleum ether). 1H NMR (400 MHz, CDCl3) δ 7.65-7.62 (m, 4H), 7.59-7.56 (m, 2H), 7.48-7.44 (m, 4H), 7.42-7.39 (m, 3H), 7.38-7.35 (m, 1H), 5.58 (t, *J* = 4.0 Hz, 1H), 2.48-2.42 (m, 2H), 1.73-1.67 (m, 1H), 1.49-1.43 (m, 2H), 0.97 (dd, *J* = 6.8, 2.0 Hz, 6H), 0.46 (d, *J* = 5.6 Hz, 6H). 13C NMR (100 MHz, CDCl3) δ 211.7, 141.1, 138.7, 138.6, 136.3, 133.9, 129.4, 128.9, 128.0, 127.2, 127.0, 126.0, 99.7, 85.5, 37.6, 28.1, 27.1, 22.8, 22.8, -1.9, -1.9. FT-IR: ν (cm-1) 2954, 1919, 1518, 836, 695. HRMS [ESI] calcd for C28H32NaSi [M+Na]+ 419.2165, found 419.2166.

**1z**: yellow oil. Purification by flash column chromatography on silica gel (eluent: Petroleum ether). 1H NMR (400 MHz, CDCl3) δ 7.64-7.61 (m, 2H), 7.41-7.38 (m, 3H), 7.23-7.19 (m, 3H), 7.02-7.00 (m, 1H), 5.53 (t, *J* = 4.0 Hz, 1H), 2.42-2.38 (m, 2H), 2.36 (s, 3H), 1.72-1.65 (m, 1H), 1.46-1.40 (m, 2H), 0.96 (dd, *J* = 6.8, 2.0 Hz, 6H), 0.44 (d, *J* = 2.8 Hz, 6H). 13C NMR (100 MHz, CDCl3) δ 211.6, 138.7, 137.9, 137.2, 133.9, 129.3, 128.4, 128.0, 126.8, 126.4, 122.7, 99.9, 85.2, 37.6, 28.1, 27.1, 22.8, 21.7, -1.9, -1.9. FT-IR: ν (cm-1) 2955, 2926, 1250, 781, 698. HRMS [ESI] calcd for C23H30NaSi [M+Na]+ 357.2009, found 357.2000.

**1aa**: yellow oil. Purification by flash column chromatography on silica gel (eluent: Petroleum ether). 1H NMR (400 MHz, CDCl3) δ 7.60-7.58 (m, 2H), 7.40-7.36 (m, 3H), 7.33-7.32 (m, 1H), 7.22-7.21 (m, 2H), 7.14-7.11 (m, 1H), 5.55 (t, *J* = 4.0 Hz, 1H), 2.38-2.32 (m, 2H), 1.69-1.62 (m, 1H), 1.42-1.36 (m, 2H), 0.94 (dd, *J* = 6.4, 1.6 Hz, 6H), 0.43 (d, *J* = 4.4 Hz, 6H). 13C NMR (100 MHz, CDCl3) δ 211.2, 139.5, 138.2, 134.5, 133.8, 129.6, 129.4, 128.0, 125.9, 125.6, 123.6, 99.2, 86.0, 37.4, 28.0, 26.8, 22.7, 22.7, -2.0. FT-IR: ν (cm-1) 2956, 2929, 1304, 821, 696. HRMS [ESI] calcd for C22H27ClNaSi [M+Na]+ 377.1463, found 377.1461.

**1ab**: yellow oil. Purification by flash column chromatography on silica gel (eluent: Petroleum ether). 1H NMR (400 MHz, CDCl3) δ 7.60 -7.57 (m, 2H), 7.48-7.47 (m, 1H), 7.40-7.36 (m, 3H), 7.29-7.25 (m, 2H), 7.17-7.13 (m, 1H), 5.55 (t, *J* = 4.0 Hz, 1H), 2.36-2.30 (m, 2H), 1.68-1.61 (m, 1H), 1.41-1.35 (m, 2H), 0.93 (dd, *J* = 6.4, 1.6 Hz, 6H), 0.42 (d, *J* = 3.2 Hz, 6H). 13C NMR (100 MHz, CDCl3) δ 211.1, 139.8, 138.2, 133.8, 129.9, 129.5, 128.8, 128.5, 128.0, 124.1, 122.8, 99.1, 86.1, 37.4, 28.0, 26.8, 22.7, 22.7, -2.0, -2.0. FT-IR: ν (cm-1) 2955, 2869, 1249, 820, 697. HRMS [ESI] calcd for C22H27BrNaSi [M+Na]+ 421.0958, found 421.0955.

**1ac**: yellow oil. Purification by flash column chromatography on silica gel (eluent: Petroleum ether). 1H NMR (400 MHz, CDCl3) δ 7.79-7.72 (m, 3H), 7.67 (s, 1H), 7.62-7.59 (m, 2H), 7.57-7.54 (m, 1H), 7.45-7.37 (m, 5H), 5.59 (t, *J* = 3.6 Hz, 1H), 2.53-2.48 (m, 2H), 1.73-1.67 (m, 1H), 1.49-1.43 (m, 2H), 0.96 (dd, *J* = 6.4, 2.0 Hz, 6H), 0.43 (d, *J* = 6.0 Hz, 6H). 13C NMR (100 MHz, CDCl3) δ 212.1, 138.6, 134.7, 133.9, 133.9, 132.2, 129.4, 128.0, 127.9, 127.8, 127.7, 126.1, 125.4, 125.2, 122.8, 100.3, 85.7, 37.5, 28.2, 27.0, 22.8, 22.8, -1.9, -2.0. FT-IR: ν (cm-1) 2953, 2925, 1599, 882, 762. HRMS [ESI] calcd for C26H30NaSi [M+Na]+ 393.2009, found 393.2004.

**1ad**: colorless oil. Purification by flash column chromatography on silica gel (eluent: Petroleum ether). 1H NMR (400 MHz, CDCl3) δ 4.82-4.79 (m, 1H), 4.70 (q, *J* = 7.2 Hz, 1H), 2.02-1.97 (m, 2H), 1.39-1.34 (m, 4H), 1.07-1.05 (m, 21H), 0.90 (t, *J* = 7.2 Hz, 3H). 13C NMR (100 MHz, CDCl3) δ 211.5, 82.9, 76.0, 32.3, 28.1, 22.4, 18.7, 14.1, 11.5. FT-IR: ν (cm-1) 2943, 2866, 1463, 882, 676. HRMS [ESI] calcd for C16H32NaSi [M+Na]+ 275.2165, found 275.2170.]

**1a-1**:colorless oil. Purification by flash column chromatography on silica gel (eluent: Petroleum ether). 1H NMR (400 MHz, CDCl3) δ 7.32-7.27 (m, 4H), 7.20-7.16 (m, 1H), 6.08-6.04 (m, 1H), 2.12-2.08 (m, 2H), 1.83 (d, *J* = 2.8 Hz, 3H), 1.65-1.58 (m, 1H), 1.42-1.36 (m, 2H), 0.90 (t, *J* = 6.8 Hz, 6H). 13C NMR (100 MHz, CDCl3) δ 202.8, 136.3, 128.6, 126.6, 126.5, 104.1, 94.0, 36.8, 32.2, 27.9, 22.7, 22.7, 19.0. FT-IR: ν (cm-1) 2954, 2918, 1496, 840, 691. HRMS [EI] calcd for C15H20 [M]+ 200.1565, found 200.1561.

**1a-2**:colorless oil. Purification by flash column chromatography on silica gel (eluent: Petroleum ether). 1H NMR (400 MHz, CDCl3) δ 5.02-4.98 (m, 1H), 1.96-1.91 (m, 2H), 1.68 (d, *J* = 2.8 Hz, 3H), 1.62-1.57 (m, 1H), 1.33-1.29 (m, 2H), 1.01 (s, 9H), 0.89 (d, *J* = 6.8 Hz, 6H). 13C NMR (100 MHz, CDCl3) δ 198.3, 102.5, 101.4, 39.3, 37.1, 32.2, 30.5, 27.8, 22.8, 22.7, 19.8. FT-IR: ν (cm-1) 2956, 2925, 1950, 1461, 810. HRMS [EI] calcd for C13H24 [M]+ 180.1878, found 180.1874.

**4. General procedures for the synthesis of products**

To a reaction flask was added silyl-allene (0.2 mmol, 1.0 equiv.) and stirred for 1.5 h at rt under air. Fe(OTf)2 (10 mol %) and EtOAc (2 mL) were added and then the mixture was stirred under N2 for 12 h. Upon completion, the reaction solvent was evaporated and the residue was purified by column chromatography on silica gel (eluent: EtOAc/Petroleum ether) to afford the desired product

To a reaction flask was added silyl-allene (0.2 mmol, 1.0 equiv.) and stirred for 24 h at rt under air. Fe(OTf)2 (10 mol %) and EtOAc (2 mL) were added and then the mixture was stirred under N2 for 12 h. Upon completion, the reaction solvent was evaporated and the residue was purified by column chromatography on silica gel (eluent: EtOAc/Petroleum ether) to afford the desired product.

**2a**: 39.2 mg, 78%, colorless oil. 1H NMR (400 MHz, CDCl3) δ 2.64-2.60 (m, 2H), 2.17 (s, 3H), 1.68-1.64 (m, 2H), 1.19 (s, 6H), 0.91 (s, 9H), 0.06 (s, 6H). 13C NMR (101 MHz, CDCl3) δ 209.0, 114.2, 82.5, 40.4, 36.7, 31.6, 30.1, 29.3, 26.2, 16.7, -4.3. FT-IR: ν (cm-1) 2955, 2928, 2858, 2159, 1718, 825. HRMS [ESI] calcd for C15H28NaOSi [M+Na]+ 275.1802, found 275.1810.

**2b**: 44.2 mg, 75%, colorless oil. 1H NMR (400 MHz, CDCl3) δ 2.67-2.63 (m, 2H), 2.16 (s, 3H), 1.68-1.64 (m, 2H), 1.20 (s, 6H), 1.06-1.02 (m, 21H). 13C NMR (100 MHz, CDCl3) δ 209.1, 115.6, 80.1, 40.5, 36.7, 31.8, 30.1, 29.4, 18.8, 11.3. FT-IR: ν (cm-1) 2963, 2865, 2158, 1720, 882. HRMS [ESI] calcd for C18H34NaOSi [M+Na]+ 317.2271, found 317.2274.

**2c**: 51.7 mg, 92%, colorless oil. 1H NMR (400 MHz, CDCl3) δ 2.66-2.62 (m, 2H), 2.54-2.47 (m, 1H), 2.15 (s, 3H), 1.82-1.74 (m, 1H), 1.60-1.51 (m, 1H), 1.18 (d, *J* = 6.8 Hz, 3H), 1.08-1.03 (m, 21H). 13C NMR (100 MHz, CDCl3) δ 208.8, 112.8, 80.9, 41.6, 30.8, 30.2, 26.5, 21.5, 18.8, 11.4. FT-IR: ν (cm-1) 2960, 2865, 2164, 1719, 882, 659. HRMS [ESI] calcd for C17H32NaOSi [M+Na]+ 303.2115, found 303.2110.

**2d**: 39.5 mg, 83%, colorless oil. 1H NMR (400 MHz, CDCl3) δ 2.64-2.59 (m, 2H), 2.51-2.46 (m, 1H), 2.15 (s, 3H), 1.80-1.72 (m, 1H), 1.59-1.53 (m, 1H), 1.17 (d, *J* = 6.8 Hz, 3H), 0.92 (s, 9H), 0.07 (s, 6H). 13C NMR (100 MHz, CDCl3) δ 208.8, 111.5, 83.3, 41.5, 30.6, 30.2, 26.4, 26.2, 21.3, 16.6, -4.3. FT-IR: ν (cm-1) 2955, 2929, 2165, 1718, 1192, 774. HRMS [ESI] calcd for C14H26NaOSi [M+Na]+ 261.1645, found 261.1640.

**2e**: 29.0 mg, 61%, colorless oil. 1H NMR (400 MHz, CDCl3) δ 2.67-2.57 (m, 2H), 2.53-2.45 (m, 1H), 2.15 (s, 3H), 1.80-1.73 (m, 1H), 1.59-1.53 (m, 1H), 1.17 (t, *J* = 6.8 Hz, 3H), 0.98 (t, *J* = 8.0 Hz, 9H), 0.56 (q, *J* = 8.0 Hz, 6H). 13C NMR (100 MHz, CDCl3) δ 208.8, 112.2, 82.3, 41.5, 30.7, 30.2, 26.5, 21.4, 7.6, 4.7. FT-IR: ν (cm-1) 2956, 2934, 2875, 2164, 1718, 724. HRMS [ESI] calcd for C14H26NaOSi [M+Na]+ 261.1645, found 261.1641.

**2f**: 20.6 mg, 40%, colorless oil. 1H NMR (400 MHz, CDCl3) δ 7.66-7.60 (m, 2H), 7.40-7.35 (m, 3H), 2.64-2.58 (m, 2H), 2.58-2.51 (m, 1H), 2.14 (s, 3H), 1.82-1.75 (m, 1H), 1.65-1.61 (m, 1H), 1.21 (d, *J* = 6.8 Hz, 3H), 0.31(s, 3H). 13C NMR (100 MHz, CDCl3) δ 208.7, 137.8, 133.7, 129.4, 127.9, 112.8, 83.2, 41.4, 30.5, 30.2, 26.5, 21.1, -0.5. FT-IR: ν (cm-1) 2965, 2165, 1717,1249, 1115, 816. HRMS [ESI] calcd for C16H22NaOSi [M+Na]+ 281.1332, found 281.1336.

**2g**: 19.2 mg, 36%, colorless oil. 1H NMR (400 MHz, CDCl3) δ 2.61 (t, *J* = 7.2 Hz, 2H), 2.29 (t, *J* = 6.8 Hz, 2H), 2.15 (s, 3H), 1.82-1.75 (m, 2H), 1.08-1.02 (m, 21H). 13C NMR (100 MHz, CDCl3) δ 208.6, 108.0, 81.3, 42.2, 30.2, 22.8, 19.3, 18.8, 11.4. FT-IR: ν (cm-1) 2942, 2865, 2170, 1718, 1463, 919. HRMS [ESI] calcd for C16H30NaOSi [M+Na]+ 289.1958, found 289.1958.

**2h**: 11.8 mg, 20%, colorless oil. 1H NMR (400 MHz, CDCl3) δ 4.05 (t, *J* = 6.0 Hz, 1H), 3.39 (s, 3H), 2.66-2.63 (m, 2H), 2.15 (s, 3H), 2.02-1.96 (m, 2H), 1.07-1.05 (m, 21H). 13C NMR (100 MHz, CDCl3) δ 208.4, 105.7, 87.4, 70.6, 56.5, 39.2, 30.2, 29.6, 18.7, 11.3. FT-IR: ν (cm-1) 2942, 2866, 2167, 1719, 1463, 1110. HRMS [ESI] calcd for C17H32NaO2Si [M+Na]+ 319.2064, found 319.2065

**2i**: 42.3 mg, 72%, colorless oil. 1H NMR (400 MHz, CDCl3) δ 2.75-2.63 (m, 1H), 2.48-2.28 (m, 2H), 2.14 (s, 3H), 2.09-2.00 (m, 1H), 1.16-1.10 (m, 3H), 1.09-1.02 (m, 21H), 1.01-0.97 (m, 3H). 13C NMR (100 MHz, CDCl3) δ 208.6, 111.5, 81.5, 47.3, 34.0, 32.6, 30.5, 26.1, 23.3, 18.6, 11.2. FT-IR: ν (cm-1) 2942, 2865, 2165, 1718, 882. HRMS [ESI] calcd for C18H34NaOSi [M+Na]+ 317.2271, found 317.2269.

**2j**: 53.0 mg, 90%, colorless oil. 1H NMR (400 MHz, CDCl3) δ 2.69-2.60 (m, 2H), 2.35-2.31 (m, 1H), 2.14 (s, 3H), 1.83-1.74 (m, 1H), 1.60-1.53 (m, 1H), 1.52-1.39 (m, 2H), 1.09-1.01 (m, 24H). 13C NMR (100 MHz, CDCl3) δ 208.9, 111.5, 82.0, 41.6, 34.0, 30.2, 28.8, 28.5, 18.8, 11.9, 11.4. FT-IR: ν (cm-1) 2960, 2942, 2865, 2163, 1719, 919. HRMS [ESI] calcd for C18H34NaOSi [M+Na]+ 317.2271, found 317.2270.

**2k**: 28.7 mg, 43%, colorless oil. 1H NMR (400 MHz, CDCl3) δ 2.69-2.65 (m, 2H), 2.15 (s, 3H), 1.73-1.42 (m, 12H), 1.07-1.04 (m, 21H). 13C NMR (100 MHz, CDCl3) δ 209.4, 113.6, 82.9, 39.5, 38.0, 37.4, 36.7, 30.1, 26.3, 23.3, 18.8, 11.4. FT-IR: ν (cm-1) 2927, 2864, 2158, 1719, 882. HRMS [ESI] calcd for C21H38NaOSi [M+Na]+ 357.2584, found 357.2580.

**2l**: 50.4 mg, 67%, colorless oil. 1H NMR (400 MHz, CDCl3) δ 5.85-5.75 (m, 1H), 5.00-4.91 (m, 2H), 2.70-2.57 (m, 2H), 2.43-2.36 (m, 1H), 2.15 (s, 3H), 2.06-2.01 (m, 2H), 1.83-1.75 (m, 1H), 1.57-1.53 (m, 1H), 1.46-1.29 (m, 10H), 1.09-1.01 (m, 21H). 13C NMR (100 MHz, CDCl3) δ 209.0, 139.3, 114.3, 111.7, 82.0, 41.6, 35.4, 33.9, 32.3, 30.2, 29.3, 29.2, 29.1, 29.0, 27.4, 18.8, 11.4. FT-IR: ν (cm-1) 2927, 2864, 2163, 1720, 1463, 909. HRMS [ESI] calcd for C24H44NaOSi [M+Na]+ 399.3054, found 399.3054.

**2m**: 41.2 mg, 70%, colorless oil. 1H NMR (400 MHz, CDCl3) δ 2.63-2.59 (m, 2H), 2.54-2.45 (m, 1H), 2.43 (q, *J* = 7.2 Hz, 2H), 1.83-1.75 (m, 1H), 1.60-1.52 (m, 1H), 1.18 (d, *J* = 7.2 Hz, 3H), 1.11-1.07 (m, 3H), 1.06-1.03 (m, 21H); 13C NMR (100 MHz, CDCl3) δ 211.6, 112.9, 80.8, 40.1, 36.2, 30.9, 26.6, 21.5, 18.8, 11.4, 8.0. FT-IR: ν (cm-1) 2960, 2866, 2164, 1717, 882. HRMS [ESI] calcd for C18H34NaOSi [M+Na]+ 317.2271, found 317.2268.

**2n**: 51.5 mg, 80%, colorless oil. 1H NMR (400 MHz, CDCl3) δ 2.63-2.59 (m, 2H), 2.52-2.46 (m, 1H), 2.42-2.38 (m, 2H), 1.83-1.74 (m, 1H), 1.59-1.52 (m, 3H), 1.33-1.27 (m, 2H), 1.18 (d, *J* = 6.8 Hz, 3H), 1.08-1.02 (m, 21H), 0.90 (t, *J* = 7.2 Hz, 3H). 13C NMR (100 MHz, CDCl3) δ 211.3, 112.9, 80.8, 42.9, 40.5, 30.8, 26.6, 26.2, 22.5, 21.5, 18.8, 14.0, 11.4. FT-IR: ν (cm-1) 2959, 2865, 2163, 1716, 882, 675. HRMS [ESI] calcd for C20H38NaOSi [M+Na]+ 345.2584, found 345.2576.

**2o**: 38.6 mg, 63%, colorless oil. 1H NMR (400 MHz, CDCl3) δ 2.77-2.73 (m, 2H), 2.56-2.47 (m, 1H), 1.96-1.89 (m, 1H), 1.85-1.77 (m, 1H), 1.65-1.59 (m, 1H), 1.19 (d, *J* = 6.8 Hz, 3H), 1.08-1.04 (m, 21H), 1.01-1.00 (m, 2H), 0.87-0.84 (m, 2H). 13C NMR (100 MHz, CDCl3) δ 210.9, 113.0, 80.8, 41.1, 31.0, 26.6, 21.5, 20.8, 18.8, 11.4, 10.6. FT-IR: ν (cm-1) 2941, 2893, 1705, 1400, 882. HRMS [ESI] calcd for C19H34NaOSi [M+Na]+ 329.2271, found 329.2267.

**2p**: 30.1 mg, 47%, colorless oil. 1H NMR (400 MHz, CDCl3) δ 3.29-3.21 (m, 1H), 2.59-2.54 (m, 2H), 2.51-2.45(m, 1H), 2.24-2.09 (m, 4H), 1.99-1.92 (m, 1H), 1.84-1.75 (m, 2H), 1.58-1.52 (m, 1H), 1.18 (d, *J* = 6.8 Hz, 3H), 1.08-1.02 (m, 21H); 13C NMR (100 MHz, CDCl3) δ 211.9, 112.9, 80.7, 45.7, 37.8, 30.8, 26.6, 24.5, 24.4, 21.5, 18.8, 18.6, 17.9, 11.4. FT-IR: ν (cm-1) 2942, 2893, 2865, 2163, 1709, 1407, 882. HRMS [ESI] calcd for C20H36NaOSi [M+Na]+ 343.2428, found 343.2420.

**2r**: 40.1 mg, 60% yellow oil. 1H NMR (400 MHz, CDCl3) δ 7.97-7.95 (m, 2H), 7.65-7.63 (m, 2H), 7.57-7.54 (m, 1H), 7.45-7.41 (m, 2H), 7.37-7.32 (m, 3H), 3.20-3.16 (m, 2H), 1.89-1.85 (m, 2H), 1.30 (s, 6H), 0.40 (s, 6H). 13C NMR (100 MHz, CDCl3) δ 200.5, 137.9, 137.0, 133.8, 133.1, 129.4, 128.7, 128.3, 128.0, 115.7, 82.6, 37.5, 35.4, 32.0, 29.3, -0.4. FT-IR: ν (cm-1) 2959, 2156, 1645, 1251, 1071, 822. HRMS [ESI] calcd for C22H26NaOSi [M+Na]+ 357.1645, found 357.1643.

**2s**: 31.3 mg, 45%, yellow oil. 1H NMR (400 MHz, CDCl3) δ 7.87-7.85 (m, 2H), 7.65-7.63 (m, 2H), 7.39-7.32 (m, 3H), 7.23-7.21 (m, 2H), 7.37-7.32 (m, 3H), 3.16-3.12 (m, 2H), 2.41 (s, 3H), 1.88-1.84 (m, 2H), 1.29 (s, 6H), 0.40 (s, 6H). 13C NMR (100 MHz, CDCl3) δ 200.2, 143.8, 137.9, 134.6, 133.8, 129.4, 129.4, 128.4, 128.0, 115.8, 82.6, 37.6, 35.3, 32.0, 29.3, 21.8, -0.3. FT-IR: ν (cm-1) 2964, 2926, 2158, 1725, 1249, 1116. HRMS [ESI] calcd for C23H28NaOSi [M+Na]+ 371.1802, found 371.1799.

**2t**: 21.1 mg, 30%, yellow oil. 1H NMR (400 MHz, CDCl3) δ 7.99-7.94 (m, 2H), 7.64-7.62 (m, 2H), 7.38-7.32 (m, 3H), 7.10-7.05 (m, 2H), 3.15-3.11 (m, 2H), 1.87-1.83 (m, 2H), 1.29 (s, 6H), 0.39 (s, 6H). 13C NMR (100 MHz, CDCl3) δ 198.9, 165.8(d, *J*C-F = 252.8 Hz), 137.9, 133.8, 133.4(d, *J*C-F = 3.1 Hz), 130.9(d, *J*C-F = 9.1 Hz), 129.4, 128.0, 115.8(d, *J*C-F = 21.8 Hz), 115.6, 82.8, 37.5, 35.4, 32.0, 29.3, -0.4. 19F NMR (377 MHz, CDCl3) δ -105.6. FT-IR: ν (cm-1) 2961, 2928, 2158, 1727, 1686, 1230. HRMS [ESI] calcd for C22H26FOSi [M+H]+ 353.1731, found 353.1731.

**2u**: 29.5 mg, 40%, yellow oil. 1H NMR (400 MHz, CDCl3) δ 7.89-7.85 (m, 2H), 7.64-7.61 (m, 2H), 7.39-7.34 (m, 5H), 3.14-3.10 (m, 2H), 1.87-1.83 (m, 2H), 1.29 (s, 6H), 0.39 (s, 6H). 13C NMR (100 MHz, CDCl3) δ 199.2, 139.5, 137.8, 135.3, 133.7, 129.7, 129.4, 129.0, 128.0, 115.5, 82.8, 37.4, 35.4, 32.0, 29.3, -0.4. FT-IR: ν (cm-1) 2965, 2926, 2158, 1728, 1249, 1092. HRMS [ESI] calcd for C22H26ClOSi [M+H]+ 369.1436, found 369.1435.

**2v**: 40.5 mg, 49%, yellow oil. 1H NMR (400 MHz, CDCl3) δ 7.81-7.79 (m, 2H), 7.64-7.62 (m, 2H), 7.55-7.53 (m, 2H), 7.40-7.32 (m, 3H), 3.14-3.10 (m, 2H), 1.87-1.83 (m, 2H), 1.29 (s, 6H), 0.39 (s, 6H). 13C NMR (100 MHz, CDCl3) δ 199.4, 137.8, 135.7, 133.7, 132.0, 129.8, 129.4, 128.2, 128.0, 115.5, 82.8, 37.4, 35.4, 32.0, 29.3, -0.4. FT-IR: ν (cm-1) 2967, 2926, 2157, 1687, 1586, 1289. HRMS [ESI] calcd for C22H25BrNaOSi [M+Na]+ 435.0750, found 435.0750.

**2w**: 41.4 mg, 45%, yellow oil. 1H NMR (400 MHz, CDCl3) δ 7.77-7.75 (m, 2H), 7.65-7.62 (m, 4H), 7.38-7.33 (m, 3H), 3.12-3.08 (m, 2H), 1.86-1.82 (m, 2H), 1.29 (s, 6H), 0.39 (s, 6H). 13C NMR (100 MHz, CDCl3) δ 199.8, 138.0, 137.8, 136.2, 133.7, 129.7, 129.5, 128.0, 115.5, 101.0, 82.8, 37.4, 35.4, 32.0, 29.3, -0.4. FT-IR: ν (cm-1) 2965, 2924, 2157, 1686, 1581, 1248. HRMS [ESI] calcd for C22H25INaOSi [M+Na]+ 483.0612, found 483.0611.

**2x**: 34.6 mg, 43%, yellow oil. 1H NMR (400 MHz, CDCl3) δ 8.03-8.01 (m, 2H), 7.66-7.61 (m, 4H), 7.37-7.31 (m, 3H), 3.19-3.15 (m, 2H), 1.88-1.84 (m, 2H), 1.30 (s, 6H), 0.39 (s, 6H). 13C NMR (100 MHz, CDCl3) δ 199.4, 139.6, 137.8, 133.7, 134.4 (q, *J*C-F = 32.4 Hz), 133.7, 129.5, 128.6, 128.0, 125.8 (q, *J*C-F = 3.7 Hz), 123.8 (q, *J*C-F = 271.0 Hz), 115.4, 83.0, 37.2, 35.8, 32.0, 29.3, -0.4. 19F NMR (377 MHz, CDCl3) δ -63.1. FT-IR: ν (cm-1) 2959, 2929, 2159, 1739, 1324, 1127. HRMS [ESI] calcd for C23H26F3OSi [M+H]+ 403.1700, found 403.1702.

**2y**: 28.7 mg, 35%, yellow solid. 1H NMR (400 MHz, CDCl3) δ 8.04-8.02 (m, 2H), 7.67-7.62 (m, 6H), 7.50-7.47 (m, 2H), 7.43-7.40 (m, 1H), 7.38-7.34 (m, 3H), 3.23-3.18 (m, 2H), 1.92-1.88 (m, 2H), 1.32 (s, 6H), 0.41 (s, 6H). 13C NMR (100 MHz, CDCl3) δ 200.1, 145.8, 140.1, 137.9, 135.7, 133.8, 129.4, 129.1, 128.9, 128.3, 128.0, 127.4, 127.4, 115.7, 82.7, 37.6, 35.5, 32.1, 29.3, -0.3. FT-IR: ν (cm-1) 2964, 2927, 2157, 1682, 1603, 1249. HRMS [ESI] calcd for C28H30NaOSi [M+Na]+ 433.1958, found 433.1960.

**2z**: 20.9 mg, 30%, yellow oil. 1H NMR (400 MHz, CDCl3) δ 7.79-7.76 (m, 2H), 7.66-7.63 (m, 2H), 7.38-7.32 (m, 5H), 3.20-3.16 (m, 2H), 2.40 (s, 3H), 1.90-1.86 (m, 2H), 1.31 (s, 6H), 0.40 (s, 6H). 13C NMR (100 MHz, CDCl3) δ 200.7, 138.5, 137.9, 137.1, 133.9, 133.7, 129.4, 128.7, 128.6, 127.9, 125.5, 115.7, 82.6, 37.4, 35.4, 32.0, 29.3, 21.5, -0.3. FT-IR: ν (cm-1) 2958, 2925, 2158, 1686, 1290, 1116. HRMS [ESI] calcd for C23H28NaOSi [M+Na]+ 371.1802, found 371.1804.

**2aa**: 37.6 mg, 51%, yellow oil. 1H NMR (400 MHz, CDCl3) δ 7.94-7.92 (m, 1H), 7.82-7.80 (m, 1H), 7.63-7.61 (m, 2H), 7.53-7.51 (m, 1H), 7.38-7.32 (m, 4H), 3.15-3.11 (m, 2H), 1.87-1.83 (m, 2H), 1.29 (s, 6H), 0.39 (s, 6H). 13C NMR (100 MHz, CDCl3) δ 199.1, 138.6, 137.8, 135.1, 133.7, 133.1, 130.1, 129.4, 128.3, 128.0, 126.4, 115.5, 82.9, 37.2, 35.5, 31.9, 29.3, -0.4. FT-IR: ν (cm-1) 2960, 2926, 2158, 1691, 1259, 1116. HRMS [ESI] calcd for C22H26ClOSi [M+H]+ 369.1436, found 369.1431.

**2ab**: 44.6 mg, 54%, yellow oil. 1H NMR (400 MHz, CDCl3) δ 8.09-8.08 (m, 1H), 7.86-7.84 (m, 1H), 7.69-7.67 (m, 1H), 7.63-7.61 (m, 2H), 7.35-7.29 (m, 4H), 3.15-3.11 (m, 2H), 1.87-1.83 (m, 2H), 1.29 (s, 6H), 0.39 (s, 6H). 13C NMR (100 MHz, CDCl3) δ 199.0, 138.8, 137.8, 136.0, 133.7, 131.3, 130.3, 129.4, 128.0, 126.8, 123.2, 115.5, 82.8, 37.2, 35.5, 31.9, 29.3, -0.4. FT-IR: ν (cm-1) 2959, 2925, 2166, 1691, 1294, 1294, 1157. HRMS [ESI] calcd for C22H25BrNaOSi [M+Na]+ 435.0750, found 435.0745.

**2ac**: 56.0 mg, 73%, yellow oil. 1H NMR (400 MHz, CDCl3) δ 8.47 (m, 1H), 8.05-8.03 (m, 1H), 7.90-7.86 (m, 3H), 7.67-7.65 (m, 2H), 7.62-7.58 (m, 1H), 7.56-7.52 (m, 1H), 7.34-7.31 (m, 3H), 3.34-3.30 (m, 2H), 1.96-1.92 (m, 2H), 1.34 (s, 6H), 0.42 (s, 6H). 13C NMR (100 MHz, CDCl3) δ 200.5, 137.9, 135.7, 134.4, 133.8, 132.7, 129.8, 129.8, 129.4, 128.6, 128.5, 128.0, 127.9, 126.8, 124.1, 115.8, 82.7, 37.6, 35.5, 32.0, 29.4, -0.3. FT-IR: ν (cm-1) 2964, 2925, 2158, 1682, 1117, 822. HRMS [ESI] calcd for C26H28NaOSi [M+Na]+ 407.1802, found 407.1803.

**2ad**: 13.8 mg, 26%, colorless oil. 1H NMR (400 MHz, CDCl3) δ 9.82 (t, *J* = 1.2 Hz, 1H), 2.67-2.62 (m, 2H), 2.57-2.52 (m, 1H), 1.86-1.81 (m, 1H), 1.69-1.65 (m, 1H), 1.21 (d, *J* = 6.8 Hz, 3H), 1.06-1.05 (m, 21H). 13C NMR (100 MHz, CDCl3) δ 202.3, 112.3, 81.3, 42.1, 29.2, 26.6, 21.5, 18.8, 11.3. FT-IR: ν (cm-1) 2941, 2865, 2164, 1728, 1462, 882. HRMS [ESI] calcd for C16H30NaOSi [M+Na]+ 289.1958, found 289.1955.

**5. Scaled-up preparation**

To a reaction flask was added **1c** (1.0 mmol, 1.0 equiv.) and stirred for 3 h at rt under air. Fe(OTf)2 (10 mol %) and EtOAc (10 mL) were added and the mixture was stirred under N2 for 12 h. Upon completion, the reaction solvent was evaporated and the residue was purified by column chromatography on silica gel (eluent: EtOAc/Petroleum ether) to afford the desired product.

**6. Synthetic transformations**

A mixture of **2c** (0.2 mmol, 1.0 equiv.) in MeOH (0.5 mL) was added with NaBH4 (0.2 mmol, 1.0 equiv) at room temperature, and the reaction was stirred for 30 min. After completion, the reaction mixture was concentrated to remove MeOH under reduced pressure to give a crude alcohol product, which was diluted with saturated aqueous solution of NH4Cl and extracted with EtOAc. The combined organic layers were dried over anhydrous Na2SO4 and filtered. The filtrate was concentrated under reduced pressure to give a crude product, which was purified by silica gel column chromatography (eluent: EtOAc/Petroleum ether) to afford product **3** as a yellow oil.

**3**: 50.2 mg, 89%, yellow oil. 1H NMR (400 MHz, CDCl3) δ 3.85-3.79 (m, 1H), 2.55-2.41 (m, 1H), 1.62-1.43 (m, 4H), 1.20-1.17 (m, 6H), 1.07-1.02 (m, 21H). 13C NMR (100 MHz, CDCl3) δ 113.8, 113.6, 80.2, 80.2, 68.3, 67.8, 37.4, 36.9, 33.6, 32.9, 27.2, 26.8, 23.8, 23.7, 21.6, 21.5, 18.8, 11.4. FT-IR: ν (cm-1) 3344, 2941, 2892, 2164, 1462, 882. HRMS [ESI] calcd for C17H34OSi [M]+ 282.2379, found 282.2376.

Methyltriphenylphosphonium bromide (0.4 mmol, 2.0 equiv.) was placed in a 10 mL Schlenk tube. The tube was evacuated and refilled with nitrogen. THF (1.0 mL) and NaH (0.4 mmol, 2.0 equiv.) were successively added into the tube under N2. The bright yellow ylide solution was stirred for 30 min before **2a** (0.2 mmol, 1.0 equiv.) in THF (1 mL) was added. The solution was stirred for 1 hour, after which the reaction's completion was confirmed by TLC analysis. Quench the mixture with saturated aqueous NH4Cl. The resulting mixture was extracted with EtOAc. The combined organic layers were dried over anhydrous Na2SO4, filtered and concentrated. The residue was purified by silica gel column chromatography (eluent: EtOAc/Petroleum ether) to deliver the product **4** as a pale yellow oil.

**4**: 41.7 mg, 75%, yellow oil. 1H NMR (400 MHz, CDCl3) δ 4.71-4.70 (m, 2H), 2.51-2.43 (m, 1H), 2.28-2.11 (m, 2H), 1.73 (s, 3H), 1.59-1.54 (m, 2H), 1.19 (d, *J* = 6.8 Hz, 3H), 1.09-1.04 (m, 21H). 13C NMR (100 MHz, CDCl3) δ 145.8, 113.7, 110.2, 80.1, 35.7, 35.4, 26.8, 22.6, 21.5, 18.8, 11.4. FT-IR: ν (cm-1) 2959, 2865, 2165, 1462, 996, 883. HRMS [ESI] calcd for C18H34Si [M]+ 278.2430, found 278.2428.

To a solution of **2c** (0.2 mmol, 1.0 equiv.) in THF (2 mL) was added tetrabutylammonium fluoride (TBAF) (0.24 mL, 1 M in THF), then the reaction was stirred at room temperature for one hour. After completion, the reaction mixture was concentrated to remove solvent under reduced pressure to give a crude product.

And then, to a solution of crude product in H2O/*t*BuOH (1:1, 0.3 M) was added benzyl azide (0.24 mmol, 1.2 equiv.), CuSO4 (0.01 mmol, 5 mol %), sodium ascorbate (0.02 mmol, 10 mol %) sequentially and heat up the reaction mixture at 60 °C in an oil bath for 2 h. After the reaction was completed (monitored by TLC), extracted with ethyl acetate for three times. The organic layers were combined and dried over Na2SO4, filtered and concentrated by rotary evaporation. Then the residue was purified by silica gel column chromatography (eluent: EtOAc/Petroleum ether) to afford product **5** as a colorless oil.

**5**: 33.4 mg, 65%, yellow oil. 1H NMR (400 MHz, CDCl3) δ 7.38-7.31 (m, 3H), 7.25-7.22 (m, 2H), 7.18 (s, 1H), 5.47 (s, 2H), 2.96-2.87 (m, 1H), 2.45-2,41 (m, 2H), 2.06 (s, 3H), 1.85 (q, *J* = 7.6 Hz, 2H), 1.24 (d, *J* = 7.2 Hz, 3H). 13C NMR (100 MHz, CDCl3) δ 209.0, 153.2, 134.9, 129.2, 128.7, 128.1, 119.9, 54.1, 41.5, 30.9, 30.6, 30.0, 20.7. FT-IR: ν (cm-1) 2963, 2928, 1711, 1456, 1049, 723. HRMS [ESI] calcd for C15H20N3O [M+H]+ 258.1601, found 258.1602.

**2c** (0.2 mmol, 1.0 equiv.), PdCl2(PPh3)2 (0.009 mmol, 4.5 mol%), CuI (0.009 mmol, 4.5 mol%) were placed in a 10 mL Schlenk tube. The tube was evacuated and refilled with nitrogen. THF (1.0 mL), Et3N (0.2 mL), TBAF (0.40 mL, 1 M in THF) and 4-bromoiodobenzene (0.24 mmol, 1.2 equiv.) were successively added into the tube through syringes. The reaction was stirred at 45 ℃ for 4 h. The volatiles were removed on a rotary evaporator. Further purification by silica gel chromatography (eluent: EtOAc/Petroleum ether) gave product **6** as a yellow solid.

**6**: 50.2 mg, 90%, yellow oil. 1H NMR (400 MHz, CDCl3) δ 7.42-7.40 (m, 2H), 7.25-7.23 (m, 2H), 2.69-2.62 (m, 3H), 2.17 (s, 3H), 1.87-1.81 (m, 1H), 1.73-1.67 (m, 1H), 1.26 (d, *J* = 6.8 Hz, 3H). 13C NMR (100 MHz, CDCl3) δ 208.7, 133.2, 131.6, 122.8, 121.9, 94.9, 80.6, 41.6, 30.6, 30.3, 26.2, 21.1. FT-IR: ν (cm-1) 2969, 2932, 1715, 1486, 1070, 1011. HRMS [ESI] calcd for C14H15BrNaO [M+Na]+ 301.0198, found 301.0196.

To a reaction flask was added **2c** (0.2 mmol, 1.0 equiv.), Et2O (2 mL) and DIBAL-H (1.0 mmol, 5.0 equiv.) under N2 and stirred at 50 ℃ for 12 h. The resulting mixture was extracted with ethyl acetate, and the combined organic layer was washed with brine, dried over MgSO4, filtered, concentrated in vacuum, and purified by flash column chromatography on silica gel (eluent: EtOAc/Petroleum ether) to give final product **7**.

**7**: 28.4 mg, 50%, yellow oil. dr = 1:1. 1H NMR (400 MHz, CDCl3) δ 6.19 (dd, *J* = 14.4, 10.4 Hz, 1H), 5.27 (d, *J* = 14.4 Hz, 1H), 3.79-3.72 (m, 1H, two isomers), 2.22-2.14 (m, 1H, two isomers), 1.42-1.27 (m, 4H, two isomers), 1.19-1.17 (m, 3H, two isomers), 1.11-1.04 (m, 21H, two isomers), 0.99-0.97 (m, 3H, two isomers). 13C NMR (100 MHz, CDCl3) δ 156.3 (one isomer) & 156.2 (one isomer), 121.4 (one isomer) & 121.3 (one isomer), 68.6 (one isomer) & 68.6 (one isomer), 38.7 (one isomer) & 38.7 (one isomer), 37.2 (one isomer) & 37.1 (one isomer), 33.5 (one isomer) & 33.4 (one isomer), 23.7 (one isomer) & 23.5 (one isomer), 20.7 (one isomer) & 20.6 (one isomer), 19.1 (one isomer) & 19.1 (one isomer), 12.3 (overlap, two isomers). FT-IR: ν (cm-1) 3336, 2941, 2865, 1605, 1462, 882. HRMS [EI] calcd for C17H36OSi [M]+ 284.2535, found 284.2531.

**7. Mechanism Studies**

**7.1 Radical trapping experiments**

Following the standard procedure, additional 1.2 equiv. TEMPO was added. The corresponding peroxide intermediate **8** cannot be obtained. The resulting compound **9** was detected by HRMS. HRMS [ESI] calcd for C26H51NOSi [M+H]+ 422.3813, found 422.3812.

To a reaction flask was added **1c** (0.2 mmol, 1.0 equiv.) and stirred for 1.5 h at rt under air. Then additional 1.0 equiv. TEMPO was added. The corresponding product **2c** cannot be obtained. The reaction was completely suppressed, and only the peroxide intermediate was recovered at 75% yield.

**8**: colorless oil. 1H NMR (400 MHz, CDCl3) δ 7.73 (s, 1H), 1.80-1.76 (m, 1H), 1.68-1.64 (m, 1H), 1.49 (s, 3H), 1.47-1.42 (m, 2H), 1.37-1.31 (m, 2H), 1.07-1.06 (m, 21H), 0.91 (t, *J* = 7.2 Hz, 3H). 13C NMR (100 MHz, CDCl3) δ 107.8, 86.6, 81.7, 38.7, 26.8, 24.6, 23.0, 18.7, 14.1, 11.2. FT-IR: ν (cm-1) 3423, 2942, 2866, 1463, 1017, 882. HRMS [ESI] calcd for C17H34NaO2Si [M+Na]+ 321.2220, found 321.2224.

**7.2 Control experiments**

The starting material **1a-1** was prepared based on the reported procedure5. To a reaction flask was added **1a-1** (0.2 mmol, 1.0 equiv.) and stirred for 1.5 h at rt under air, no peroxide intermediate was detected.

The starting material **1a-2** was prepared according the Method A. To a reaction flask was added **1a-2** (0.2 mmol, 1.0 equiv.) and stirred for 1.5 h at rt under air, no peroxide intermediate was detected.

**7.3 Intermediate validation experiments**

To a reaction flask was added **1c** (0.2 mmol, 1.0 equiv.) and stirred for 1.5 h at rt under air, then additional 1 mL CH3CN and 1.0 equiv. KI were added and stirred for 5 min. The color of the solution was changed from colorless to yellow.

**7.4 Crossover experiments**

To a reaction flask was added **1a** (0.1 mmol, 1.0 equiv.) and **1m** (0.1 mmol, 1.0 equiv.) and stirred for 1.5 h at rt under air. Fe(OTf)2 (10 mol %) and EtOAc (1 mL) were added under N2 and the mixture was stirred for 12 h. Upon completion, the reaction solvent was evaporated and the residue was purified by column chromatography on silica gel (eluent: EtOAc/Petroleum ether) to afford the desired product **2a** (86% yield) and **2m**(50% yield).

**8. DFT calculations**

The M06 density functional method6 was employed to carry out geometry optimization. The 6-31+G(d) basis set7 was used for other atoms. Natural bond orbital (NBO) analyses8 were used to obtain the atomic orbital populations.

**Cartesian coordinates and energies**

C 4.36614200 -0.94203200 0.51637900

C 3.34979400 -0.23936700 1.15674900

C 2.21426800 0.18091600 0.45548000

C 2.11959600 -0.12722600 -0.90829000

C 3.13297800 -0.82785900 -1.54816000

C 4.26265600 -1.23878600 -0.83947400

H 5.24256400 -1.25890700 1.08026300

H 3.43300800 -0.00781700 2.21961200

H 1.23605500 0.19071600 -1.46350700

H 3.04239400 -1.05869600 -2.60895400

H 5.05591400 -1.78904100 -1.34315400

C 1.15856500 0.91970400 1.16341700

H 1.30470600 1.04074500 2.24201500

C 0.07801300 1.42664900 0.61202100

C -0.99370500 1.91805300 0.03989300

C -1.03246400 3.32570800 -0.49223800

H -1.25750200 3.32599200 -1.56903700

H -1.82944900 3.90188100 0.00097600

H -0.08253900 3.84820800 -0.33725800

C -2.26227000 1.11786900 -0.13608100

H -3.08436300 1.65165400 0.37593300

H -2.52241900 1.15043700 -1.20818600

C -2.19971100 -0.31999200 0.35151600

H -1.43437800 -0.87145600 -0.22526400

H -1.84825400 -0.32893300 1.39605200

C -3.52578600 -1.07439300 0.26857900

H -4.27054800 -0.51696300 0.86614400

C -4.04294200 -1.17902900 -1.16168400

H -4.95584700 -1.78858000 -1.20833700

H -4.28127000 -0.19976800 -1.59724400

H -3.29064800 -1.65977700 -1.80716800

C -3.37160900 -2.46405100 0.87356500

H -3.01367900 -2.41725100 1.91123800

H -4.32234000 -3.01446800 0.86818500

H -2.64256400 -3.05496500 0.29765600

Zero-point correction= 0.306331 (Hartree/Particle)

Thermal correction to Energy= 0.322525

Thermal correction to Enthalpy= 0.323469

Thermal correction to Gibbs Free Energy= 0.261064

Sum of electronic and zero-point Energies= -582.837907

Sum of electronic and thermal Energies= -582.821714

Sum of electronic and thermal Enthalpies= -582.820769

Sum of electronic and thermal Free Energies= -582.883174

C -4.78372200 0.24730900 0.08326200

C -3.55608700 0.89138000 0.04995800

C -2.35886900 0.14604000 0.01356000

C -2.43974800 -1.26290600 0.01203100

C -3.67319500 -1.89582400 0.04522200

C -4.85052700 -1.14673800 0.08097500

H -5.69967000 0.83590200 0.11121700

H -3.49868100 1.97883400 0.05140400

H -1.51655700 -1.84112100 -0.01563700

H -3.72024700 -2.98393400 0.04342000

H -5.81670600 -1.64796300 0.10703100

C -1.10708500 0.78877600 -0.02118900

C 0.00257600 1.33446800 -0.05208300

C 1.23164800 1.92966900 -0.08669000

C 1.36821700 3.41922500 -0.08789200

H 1.94821600 3.76147800 0.78452100

H 1.91776100 3.76273800 -0.97916800

H 0.39506400 3.92142400 -0.07032700

C 2.50328700 1.13277100 -0.11085200

H 3.09839500 1.45143700 -0.98929500

H 3.10970200 1.44063700 0.76101900

C 2.33623300 -0.37858400 -0.13119000

H 1.84227200 -0.70704800 0.80082200

H 1.64706500 -0.65117200 -0.94716300

C 3.64038900 -1.15534900 -0.30467900

H 4.10416800 -0.83085200 -1.25443800

C 4.62822100 -0.88722800 0.82500200

H 5.52520500 -1.51341300 0.72268700

H 4.96161900 0.15848100 0.85494100

H 4.17010700 -1.12141100 1.79918400

C 3.34685100 -2.64703100 -0.40213200

H 2.64585400 -2.86978700 -1.21841500

H 4.26261100 -3.22869200 -0.57513600

H 2.89468800 -3.01140900 0.53352800

Zero-point correction= 0.293269 (Hartree/Particle)

Thermal correction to Energy= 0.309660

Thermal correction to Enthalpy= 0.310604

Thermal correction to Gibbs Free Energy= 0.246770

Sum of electronic and zero-point Energies= -582.213315

Sum of electronic and thermal Energies= -582.196924

Sum of electronic and thermal Enthalpies= -582.195979

Sum of electronic and thermal Free Energies= -582.259814

C -1.84152600 0.10691700 -0.87861200

C -0.87047400 0.93255700 -0.58232700

C 0.10297400 1.75571700 -0.27018100

C -0.14387000 3.22324900 -0.04825600

H 0.14971600 3.51670300 0.97098200

H 0.46054500 3.82895300 -0.74041300

H -1.19786900 3.48566200 -0.19192900

C 1.53383300 1.30458000 -0.10382800

H 2.16074700 1.86769500 -0.82062400

H 1.87218500 1.63544400 0.89354000

C 1.77658500 -0.18552200 -0.27562100

H 1.24842000 -0.73837700 0.52297400

H 1.31728900 -0.51767800 -1.22108300

C 3.24915500 -0.59276500 -0.26876400

H 3.75276700 -0.05457600 -1.09285400

C 3.94441300 -0.22380900 1.03664100

H 4.98017700 -0.59026500 1.05082700

H 3.97819400 0.86084500 1.20376000

H 3.42037900 -0.67883400 1.89239900

C 3.37660600 -2.08859900 -0.52736600

H 2.89351200 -2.37957500 -1.47037800

H 4.42833300 -2.40264200 -0.57515500

H 2.89654600 -2.66059100 0.28205200

C -2.68222700 -0.67943100 0.10900900

C -4.15721600 -0.37479500 -0.16085000

H -4.80459800 -0.96553400 0.50428400

H -4.37624300 0.68938700 0.00494000

H -4.43028700 -0.61790400 -1.19825800

C -2.34051900 -0.31965700 1.54930400

H -1.28611800 -0.53166700 1.77644800

H -2.51576300 0.74786900 1.74521700

H -2.96203300 -0.90133400 2.24528000

C -2.42073000 -2.16951200 -0.12680100

H -2.65387800 -2.45503100 -1.16310100

H -1.36626100 -2.41771900 0.06135100

H -3.04330900 -2.78468600 0.54017700

H -2.08448000 -0.06972300 -1.93453100

Zero-point correction= 0.337374 (Hartree/Particle)

Thermal correction to Energy= 0.354441

Thermal correction to Enthalpy= 0.355385

Thermal correction to Gibbs Free Energy= 0.292450

Sum of electronic and zero-point Energies= -509.056619

Sum of electronic and thermal Energies= -509.039553

Sum of electronic and thermal Enthalpies= -509.038609

Sum of electronic and thermal Free Energies= -509.101543

C -1.75425700 0.33223200 0.00252400

C -0.77086300 1.06980700 -0.04600300

C 0.35218600 1.87030700 -0.10084700

C 0.24448700 3.36104500 -0.11700100

H 0.76599000 3.80567900 0.74698400

H 0.72359200 3.78341100 -1.01580700

H -0.79780900 3.69750600 -0.09568200

C 1.73431200 1.28571800 -0.13030100

H 2.26687400 1.68235200 -1.01786700

H 2.29526200 1.69193800 0.73245100

C 1.80521500 -0.23402300 -0.13524800

H 1.37776600 -0.62591700 0.80541800

H 1.15616500 -0.61943600 -0.93878700

C 3.21132600 -0.80223600 -0.31827300

H 3.60862400 -0.42150300 -1.27733300

C 4.15904600 -0.37103100 0.79509600

H 5.14130200 -0.85150700 0.68701900

H 4.32531600 0.71415800 0.81021000

H 3.75418300 -0.66191100 1.77761000

C 3.15065800 -2.32247500 -0.39655700

H 2.48210900 -2.66040200 -1.20048400

H 4.14299300 -2.75850800 -0.57616200

H 2.77082800 -2.74073800 0.54873600

C -2.88984800 -0.59409000 0.06292500

C -3.79936700 -0.38046100 -1.15314200

H -4.64927000 -1.07779500 -1.11508600

H -4.19439600 0.64384100 -1.17375900

H -3.25177700 -0.55371200 -2.08894500

C -3.68973900 -0.35054400 1.34848800

H -3.06240900 -0.50277300 2.23667300

H -4.08186000 0.67460300 1.37941800

H -4.53943100 -1.04719400 1.40097800

C -2.35067900 -2.02956800 0.05657400

H -1.77441800 -2.22816400 -0.85738000

H -1.69167600 -2.20479800 0.91790100

H -3.18281800 -2.74721400 0.10448400

Zero-point correction= 0.324136 (Hartree/Particle)

Thermal correction to Energy= 0.341735

Thermal correction to Enthalpy= 0.342679

Thermal correction to Gibbs Free Energy= 0.276013

Sum of electronic and zero-point Energies= -508.426573

Sum of electronic and thermal Energies= -508.408974

Sum of electronic and thermal Enthalpies= -508.408030

Sum of electronic and thermal Free Energies= -508.474696

C -0.85224500 1.14537000 -1.13391500

C 0.31778400 1.61960300 -0.78450200

C 1.46844000 2.08811200 -0.35814000

C 1.65252300 3.54835700 -0.04586400

H 1.92301300 3.68686400 1.01225300

H 2.47139600 3.97673000 -0.64365800

H 0.74384000 4.12734400 -0.24596800

C 2.67339100 1.20638500 -0.13572100

H 3.49115800 1.54834100 -0.79757600

H 3.03486100 1.39363900 0.89059700

C 2.42688800 -0.27805700 -0.34354800

H 1.67401900 -0.62591100 0.38753400

H 1.96940600 -0.42970000 -1.33546800

C 3.66468600 -1.16505300 -0.23222100

H 4.38950100 -0.83776600 -1.00023200

C 4.33328100 -1.05615500 1.13305100

H 5.17266900 -1.75979400 1.22001500

H 4.72690600 -0.05022700 1.32975600

H 3.61449100 -1.29753000 1.93250400

C 3.28311100 -2.61251600 -0.51737000

H 2.80383300 -2.71920700 -1.50068900

H 4.15866600 -3.27569400 -0.49337800

H 2.56932000 -2.97634400 0.23894200

C -2.34996500 -1.33411700 -0.04828500

C -3.70754400 1.46465700 -0.09793200

H -3.56903400 2.53623800 0.09980200

H -4.07092600 1.36528800 -1.12979000

H -4.49745300 1.10181600 0.57436300

C -1.39555800 0.95082500 1.86170200

H -0.45719200 0.41870200 2.07006000

H -1.18400400 2.02682400 1.93708500

H -2.11522100 0.69573800 2.65162200

H -1.10704900 1.09563700 -2.19999400

Si -2.08174400 0.54729700 0.15830000

C -2.98958600 -1.61451300 -1.40906600

H -2.36554200 -1.25451400 -2.24126900

H -3.12633300 -2.70003600 -1.55263900

H -3.98121700 -1.14774200 -1.50359300

C -1.01294700 -2.07125900 0.03574200

H -0.51380800 -1.91344600 1.00452900

H -1.16677200 -3.15828600 -0.07687400

H -0.31660700 -1.75174700 -0.75423600

C -3.27467300 -1.84923200 1.05612500

H -4.25511800 -1.34948300 1.04592700

H -3.46066200 -2.92930500 0.92744000

H -2.83724100 -1.71302900 2.05640900

Zero-point correction= 0.410844 (Hartree/Particle)

Thermal correction to Energy= 0.434214

Thermal correction to Enthalpy= 0.435158

Thermal correction to Gibbs Free Energy= 0.358468

Sum of electronic and zero-point Energies= -878.246396

Sum of electronic and thermal Energies= -878.223026

Sum of electronic and thermal Enthalpies= -878.222082

Sum of electronic and thermal Free Energies= -878.298772

C -0.63056500 1.06732900 0.39124800

C 0.46736200 1.56321300 0.09279000

C 1.70482500 2.06028300 -0.23189500

C 1.92047900 3.51487600 -0.49939600

H 2.65781200 3.93839500 0.20184800

H 2.32893300 3.67273900 -1.51070800

H 0.99329700 4.09102200 -0.41013900

C 2.90204300 1.15679500 -0.31402700

H 3.37607700 1.29149400 -1.30615700

H 3.65526400 1.52494700 0.40723800

C 2.62065700 -0.31992400 -0.07870900

H 2.24723800 -0.46355100 0.95129300

H 1.79581200 -0.63562300 -0.73864700

C 3.81636200 -1.24184000 -0.30770900

H 4.15413400 -1.10794500 -1.35196400

C 4.98337000 -0.91659300 0.61731600

H 5.80179800 -1.63867200 0.49089700

H 5.39871800 0.08360300 0.43605300

H 4.66220600 -0.96078200 1.67024800

C 3.38871600 -2.69284100 -0.12570600

H 2.55218500 -2.95452200 -0.78881200

H 4.21422600 -3.38775500 -0.33200500

H 3.05840900 -2.86817000 0.91018300

C -2.81218900 -0.63379200 -0.83483500

C -3.41133300 1.22612800 1.59991800

H -3.04640700 1.57741200 2.57403900

H -3.61729800 2.11051700 0.98325900

H -4.36107600 0.69987100 1.76966200

C -1.62735300 -1.25799100 1.98393400

H -0.87678800 -1.92231500 1.53299200

H -1.18004800 -0.82119600 2.88668400

H -2.48514000 -1.86977600 2.29567800

Si -2.13927700 0.10410300 0.79133600

C -3.37613100 0.48630100 -1.70942400

H -2.62226100 1.26064400 -1.91860800

H -3.71308000 0.08271200 -2.67942300

H -4.24308800 0.97653200 -1.24224500

C -1.68692600 -1.34147300 -1.59074100

H -1.21764400 -2.13702500 -0.99114600

H -2.08058100 -1.81272100 -2.50745900

H -0.89603500 -0.63872300 -1.89093800

C -3.92004600 -1.64071800 -0.52079100

H -4.74398700 -1.19054600 0.05420200

H -4.35528100 -2.03351400 -1.45534700

H -3.54314300 -2.50301000 0.04878700

Zero-point correction= 0.398414 (Hartree/Particle)

Thermal correction to Energy= 0.422110

Thermal correction to Enthalpy= 0.423054

Thermal correction to Gibbs Free Energy= 0.342864

Sum of electronic and zero-point Energies= -877.624811

Sum of electronic and thermal Energies= -877.601115

Sum of electronic and thermal Enthalpies= -877.600171

Sum of electronic and thermal Free Energies= -877.680361

**9. References**

1. (a) Sabbasani, V. R.; Huang, G.; Xia, Y.; Lee, D., *Chem. Eur. J.* **2015**, 21, 17210; (b) Guintchin, B. K.; Bienz, S. *Organometallics* **2004**, 23, 4944; (c) LaLonde, R. L.; Wang, Z. J.; Mba, M.; Lackner, A. D.; Toste, F. D. *Angew. Chem., Int. Ed.* **2010**, 49, 598.

2.Wang, Z.-X.; Bai, X.-Y.; Yao, H.-C.; Li, B.-J. *J. Am. Chem. Soc.* **2016**, 138, 14872.

3. Das, B. G.; Shah, S.; Das, A.; Singh, V. K. *Org. Lett.* **2021**, 23, 6262.

4. Rodphon, W.; Linkhum, S.; Thongsornkleeb, C.; Tummatorn, J.; Ruchirawat, S. *J. Org. Chem.* 2023, 88, 4172.

5. Wei, Y.; Wang, Z.; Wang, K.; Qiu, J.-K.; Wang, Z.; Li, H.; Duan, X.; Guo, K.; Bao, X.; Wu, X. *Angew. Chem., Int. Ed*. **2024**, *63*, e202317132.

6. Zhao, Y.; Truhlar, D. G. *Theor. Chem. Acc.* **2008**, *120*, 215−241.

7. Hariharan, P. C.; Pople, J. A. *Theoret. Chim. Acta*. **1973**, *28*, 213−222.

8. Glendening, E. D.; Badenhoop, J. K.; Reed, A. E.; Carpenter, J. E.; Bohmann, J. A.; Morales, C. M.; Weinhold, F. *NBO 5.0*; Theoretical Chemistry Institute, University of Wisconsin: Madison, 2001.

**10. NMR Spectra**


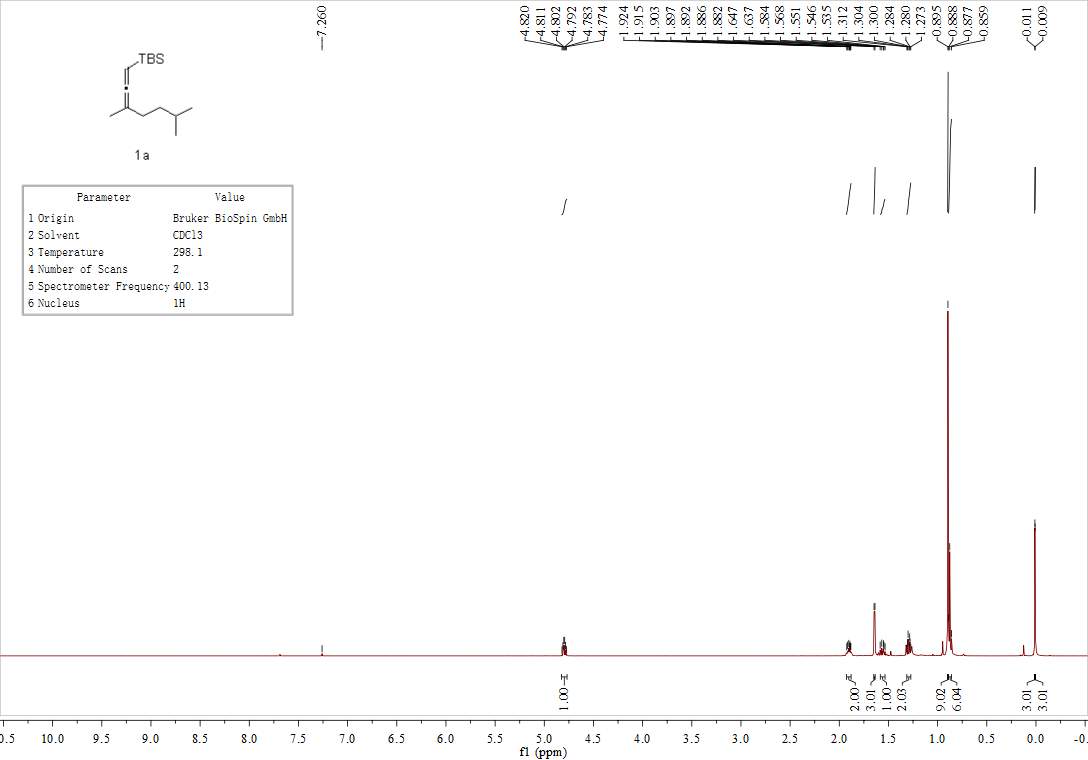


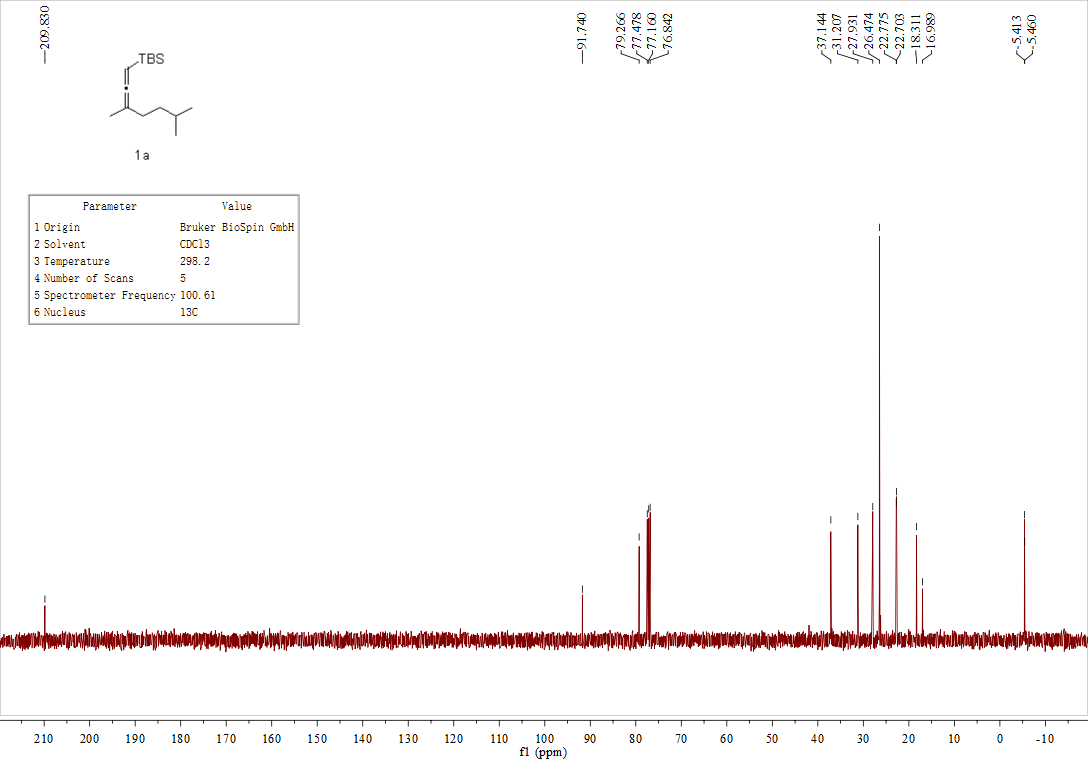


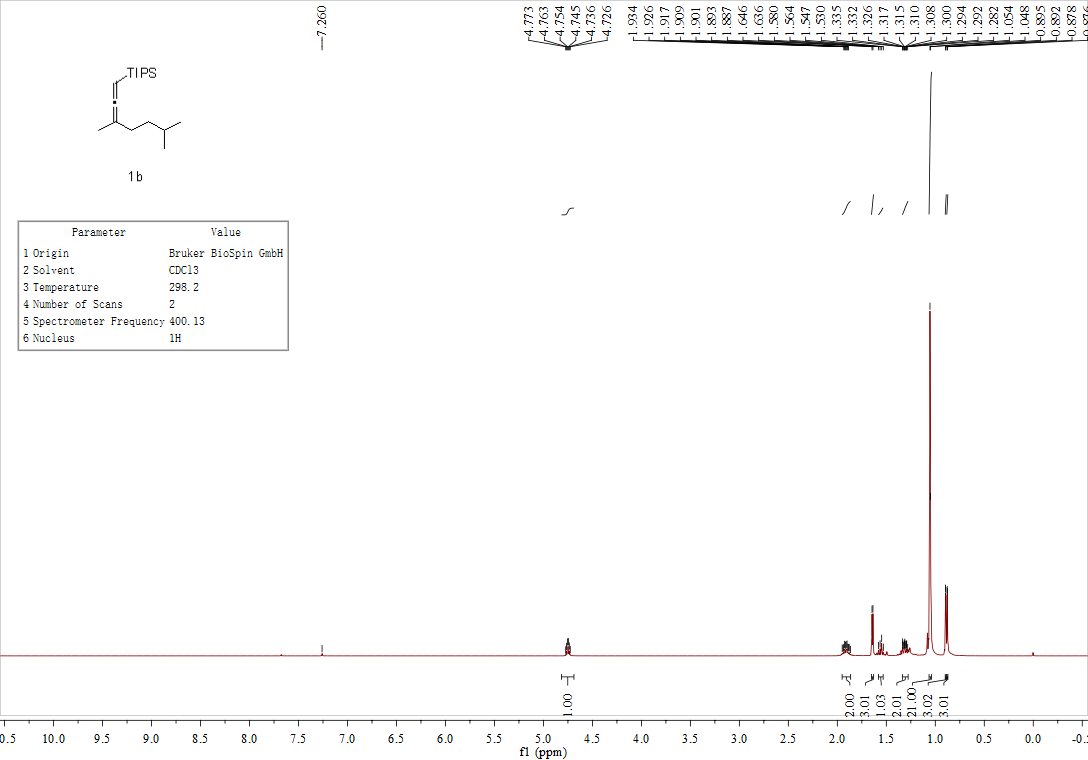


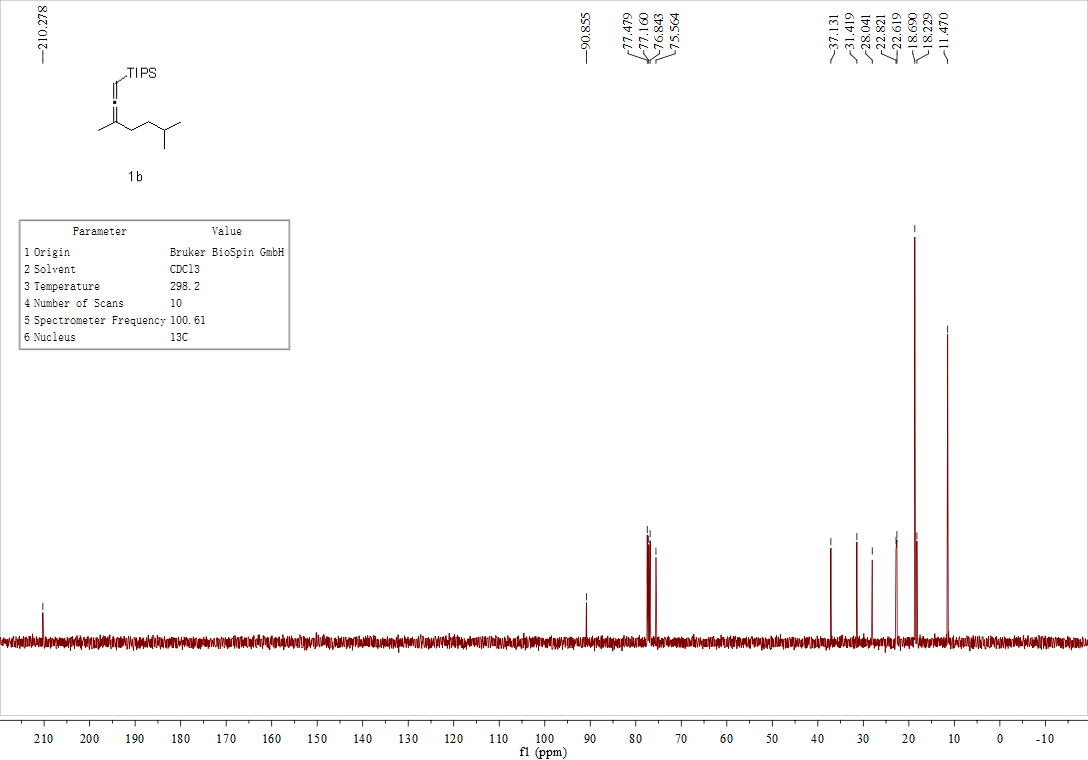


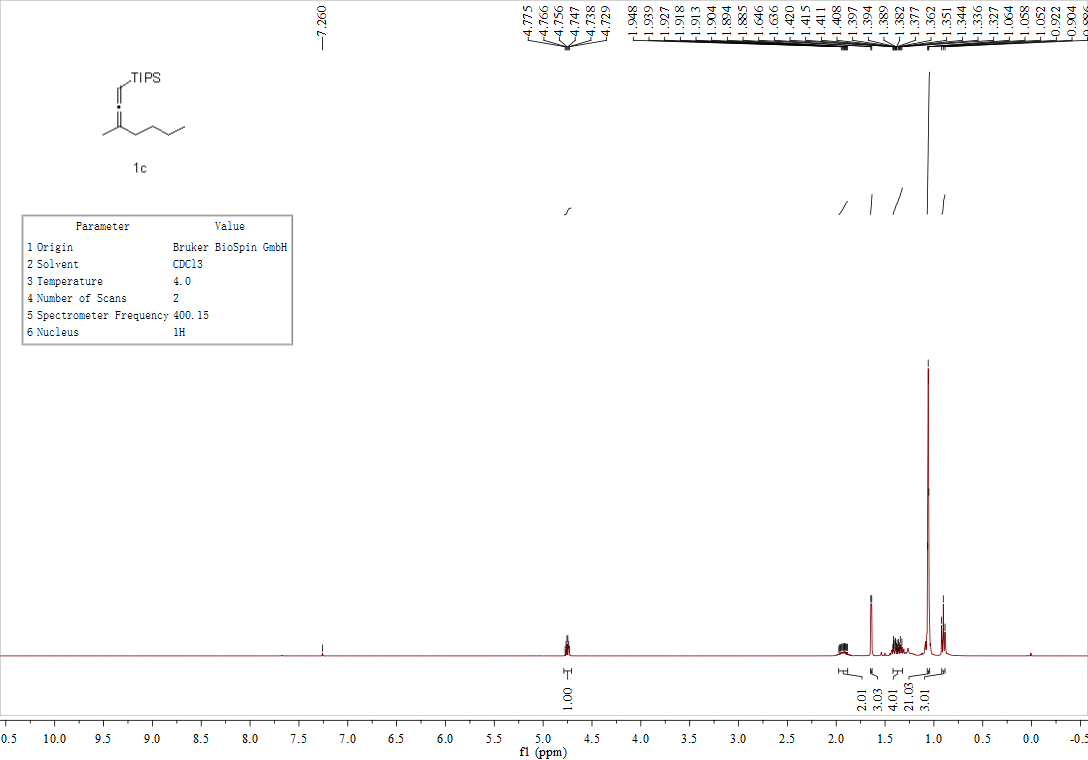


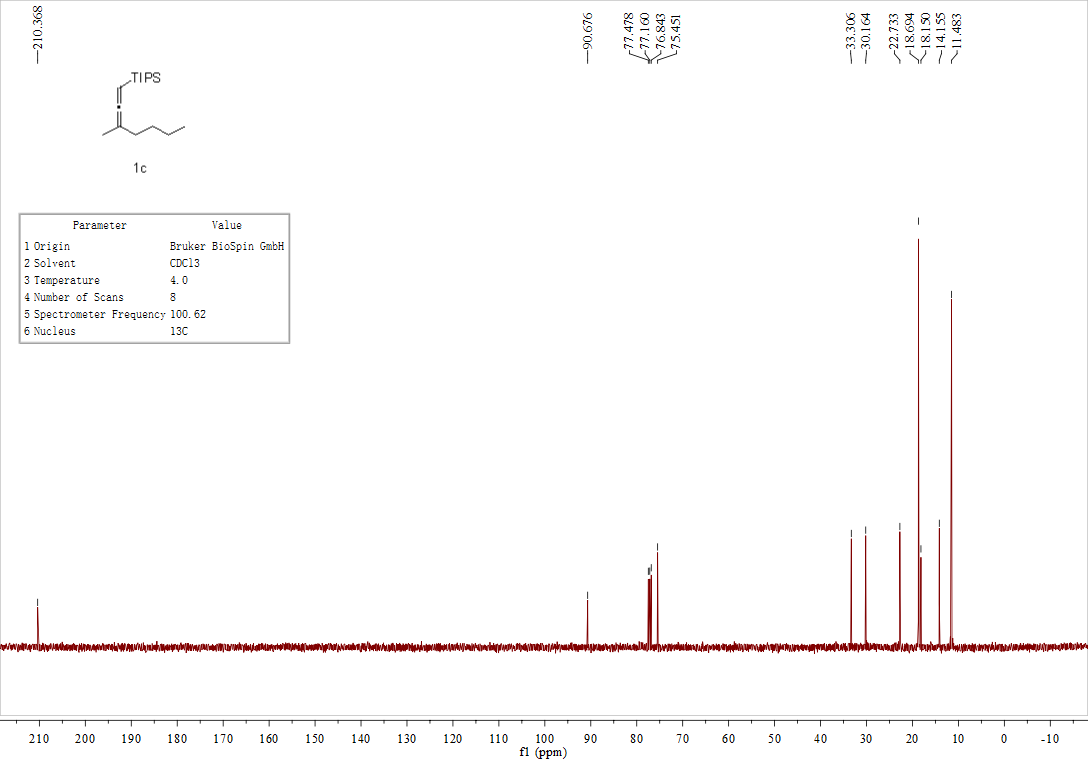


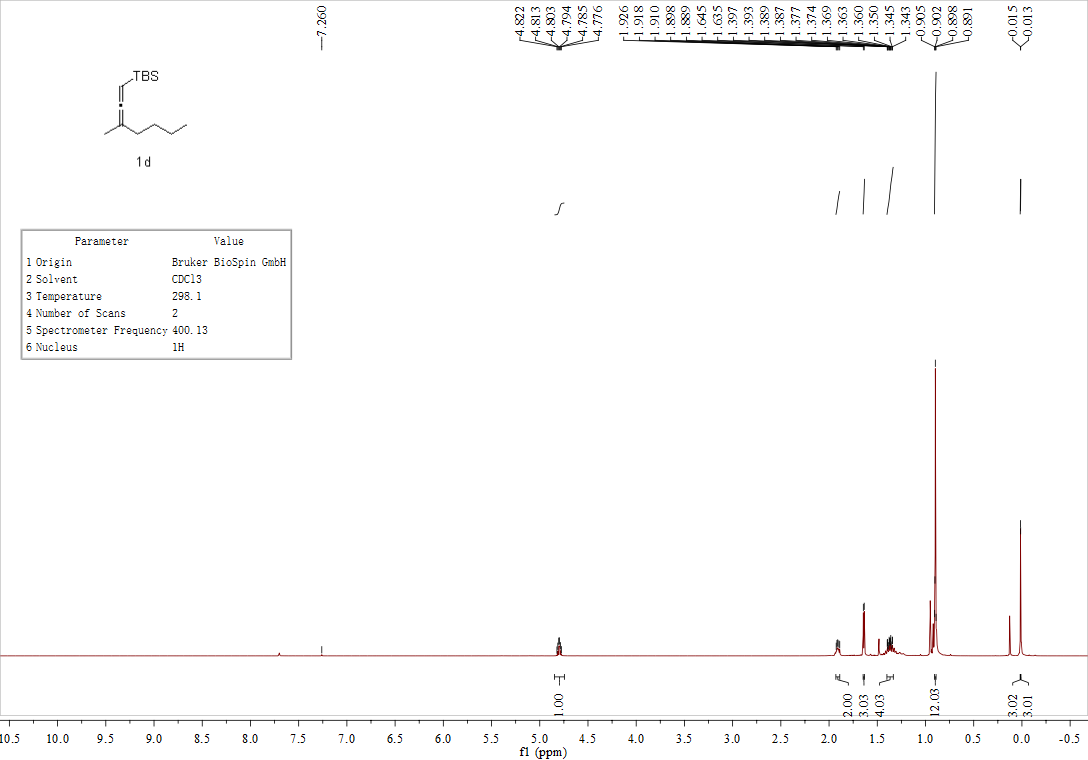


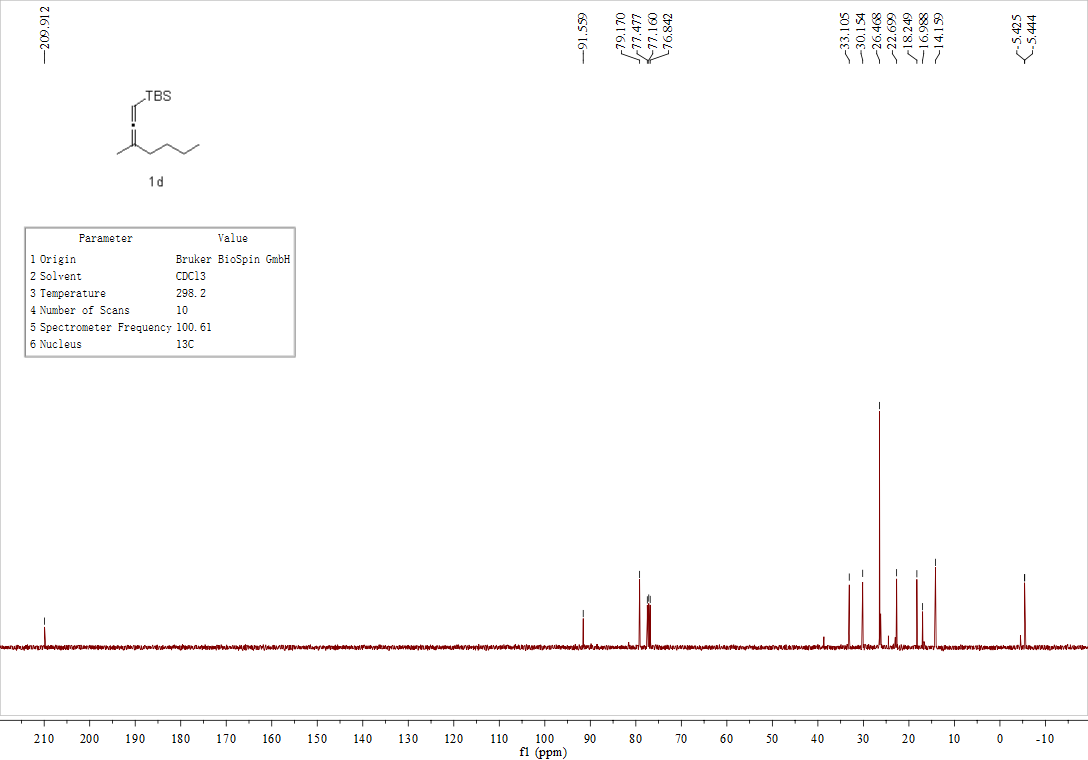


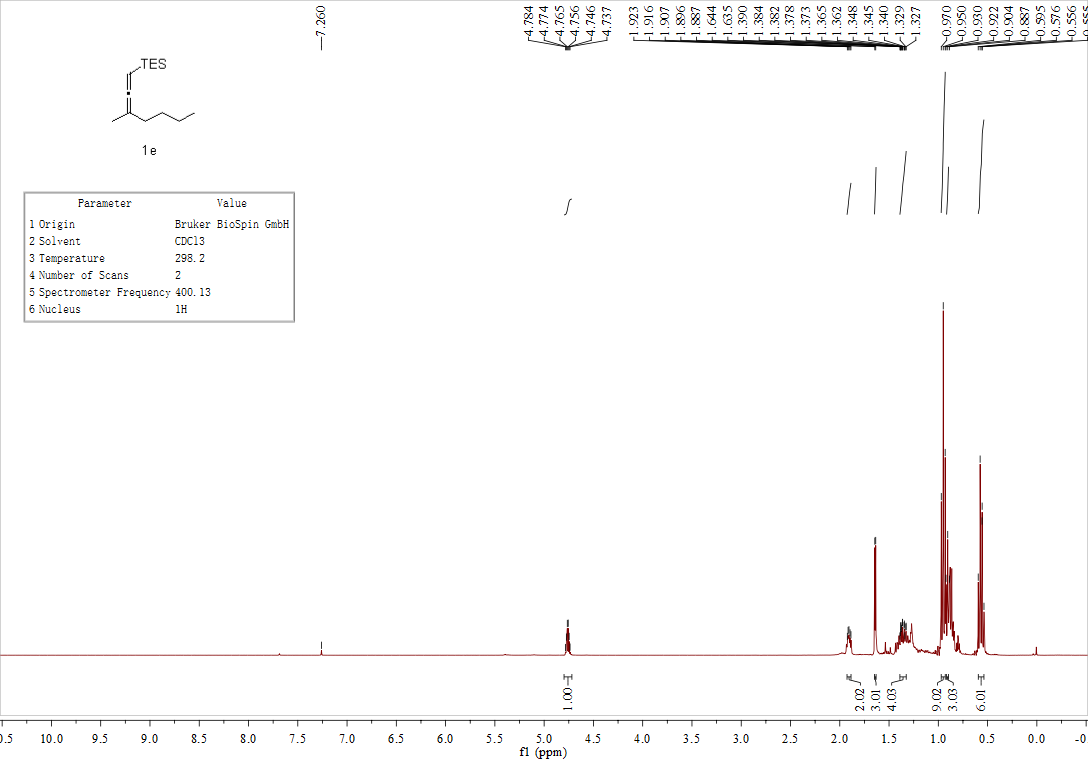


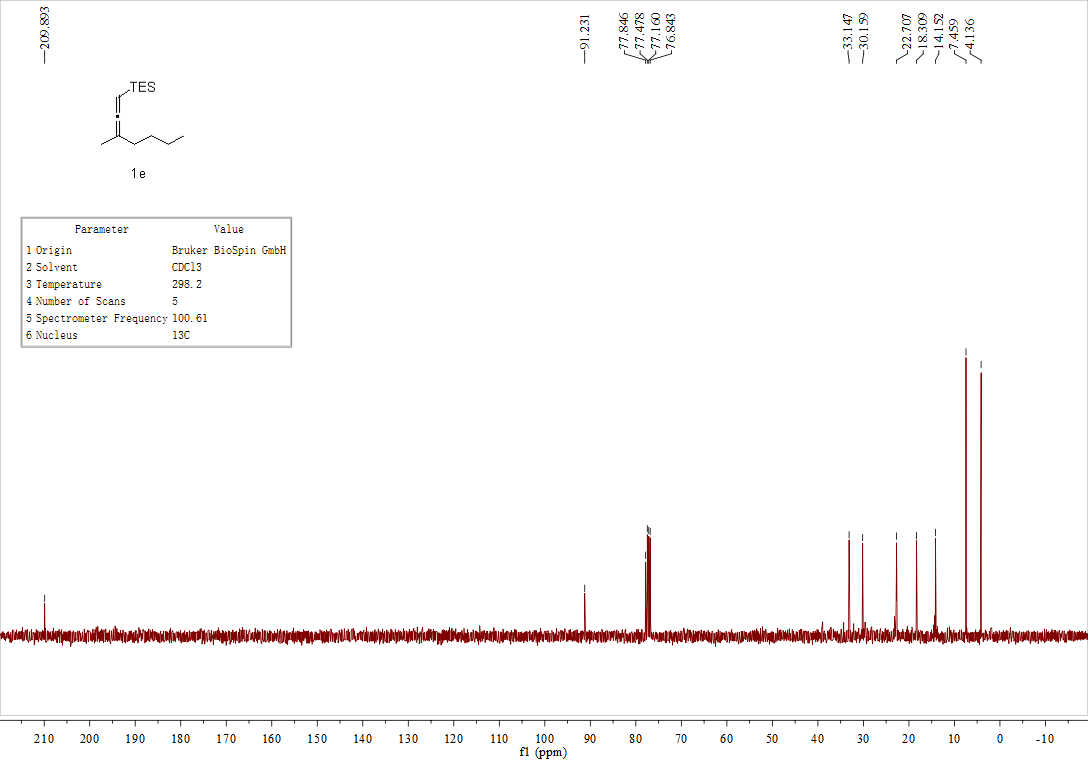


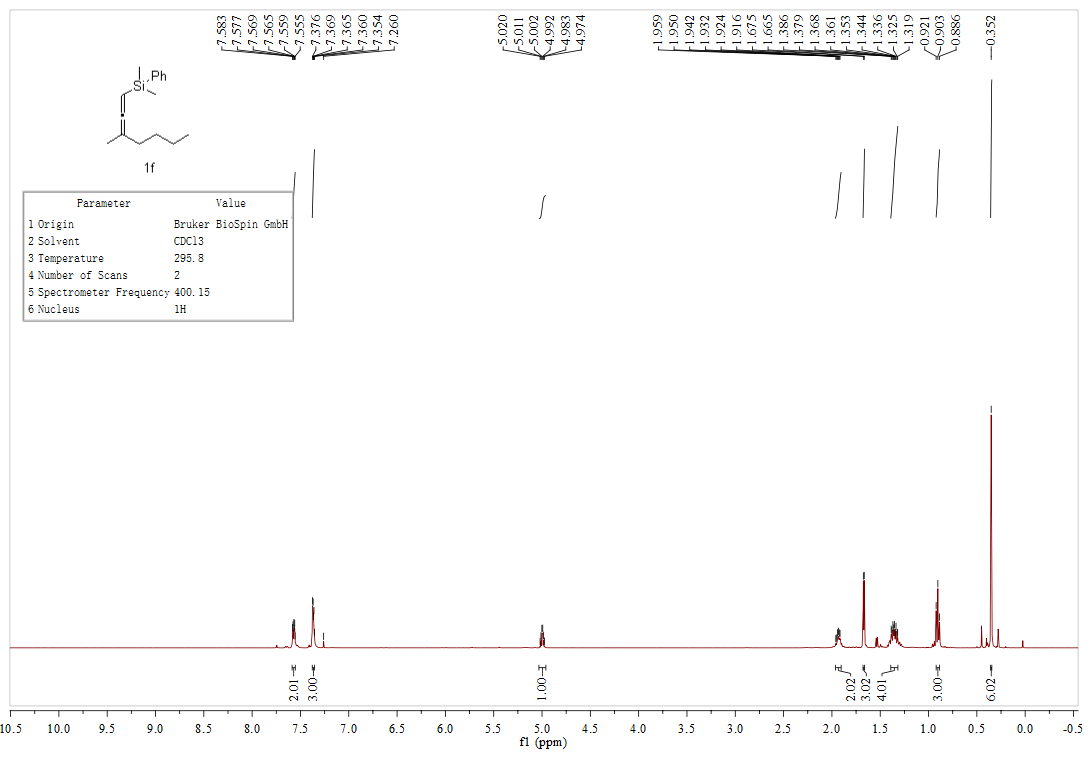


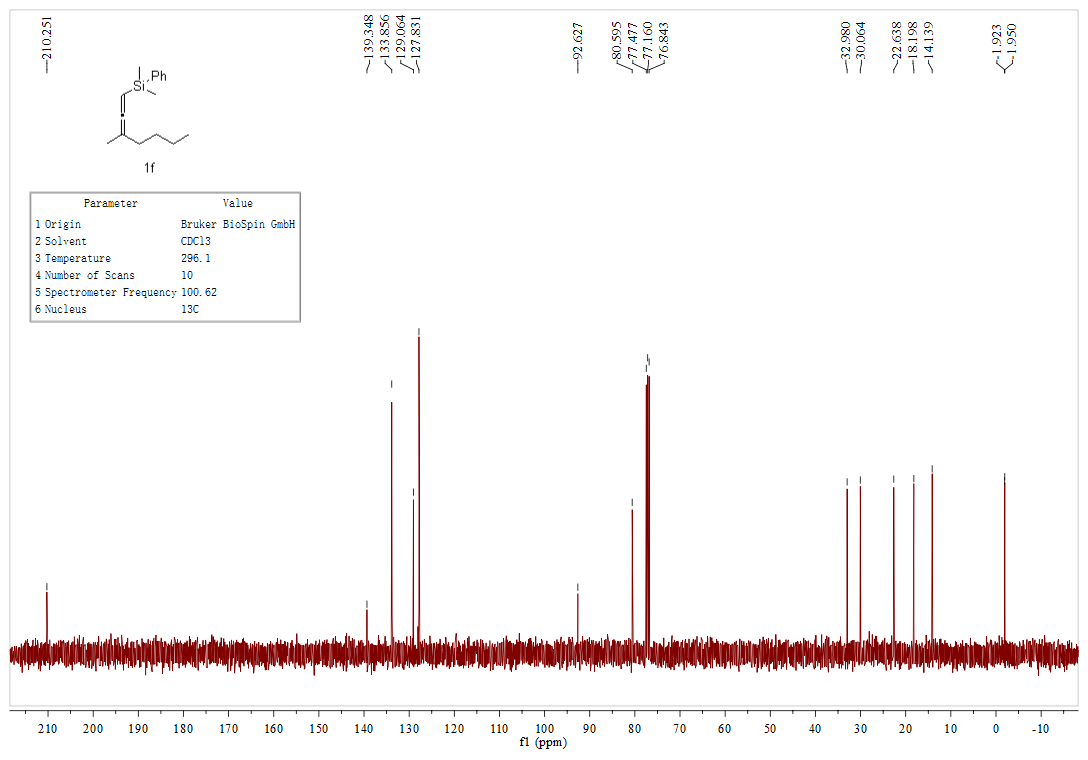


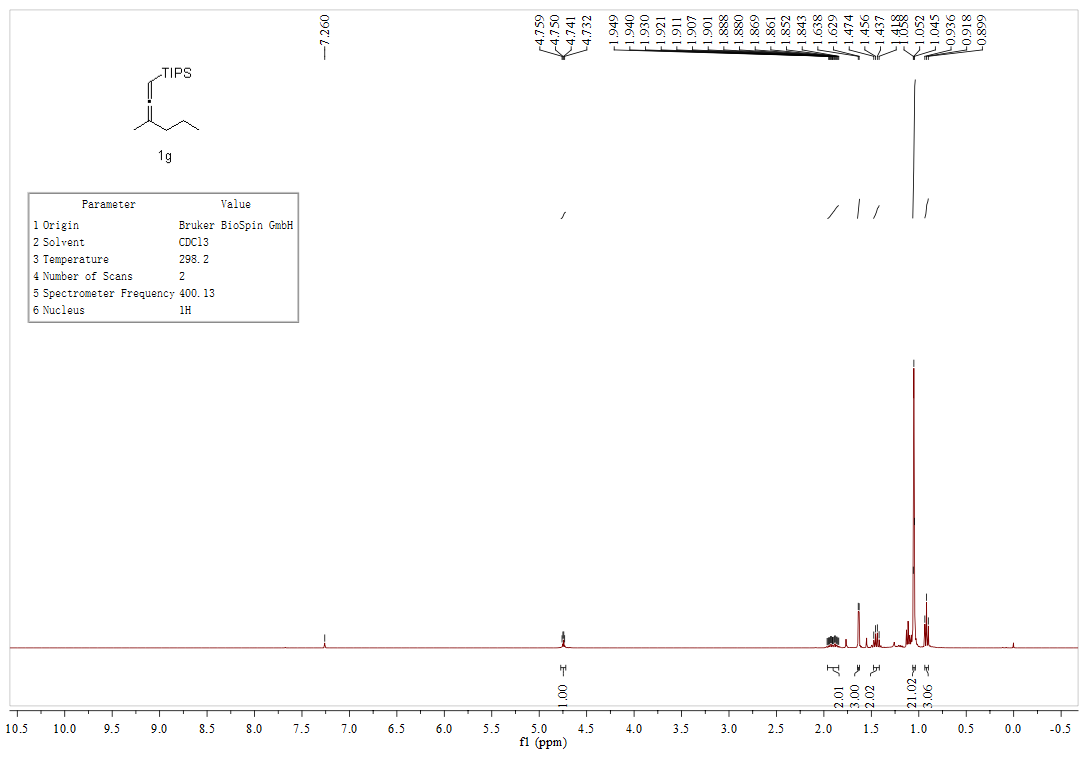


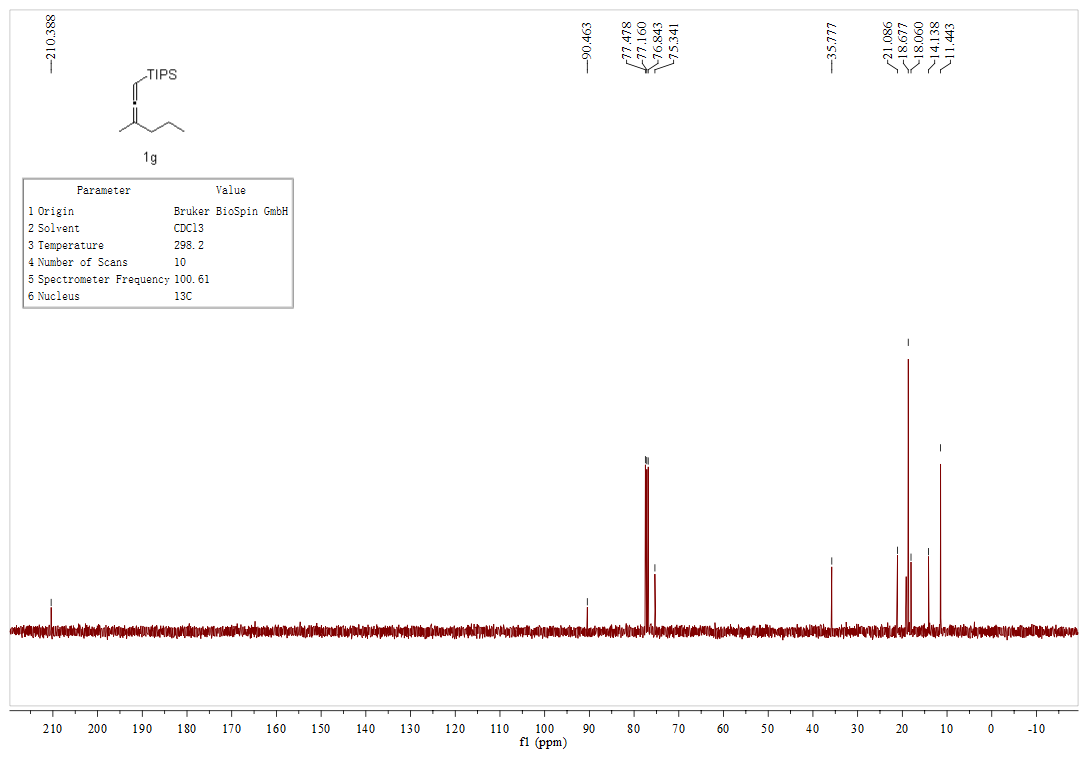


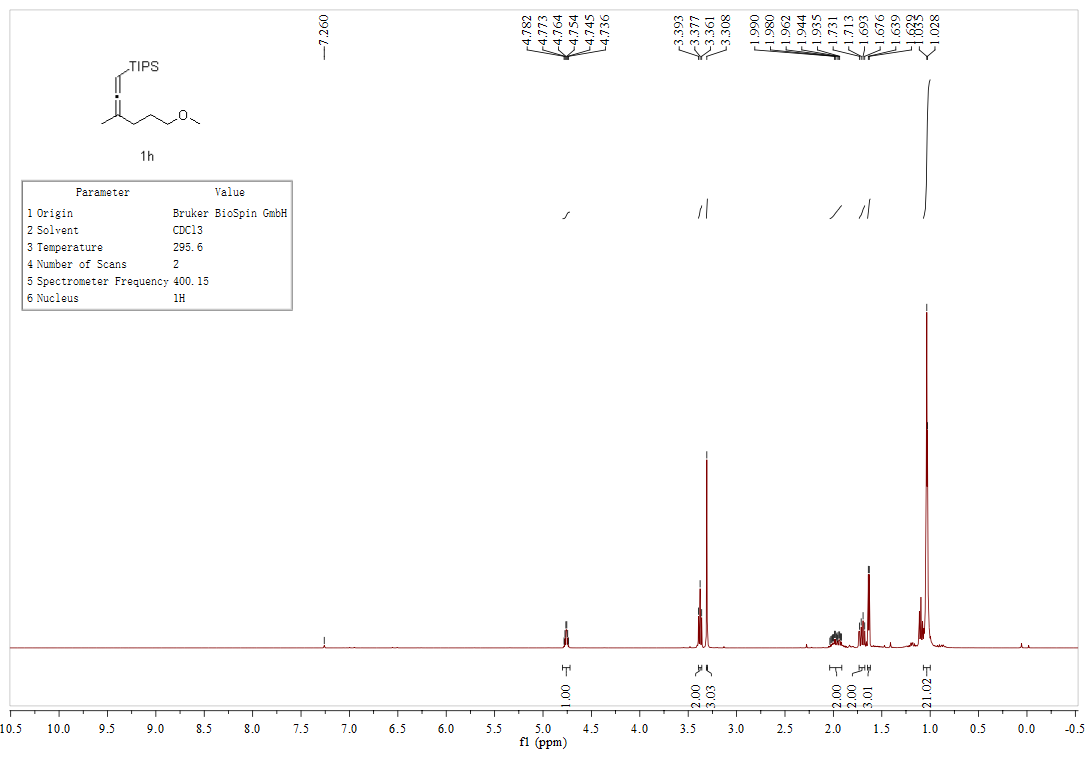


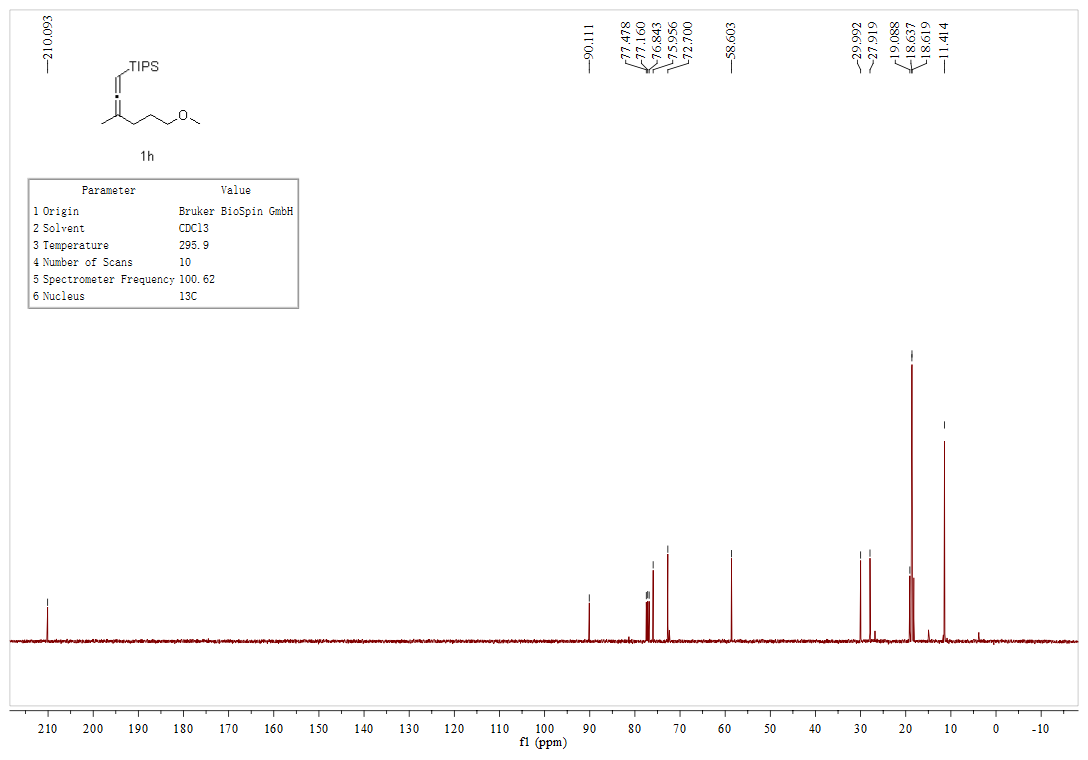


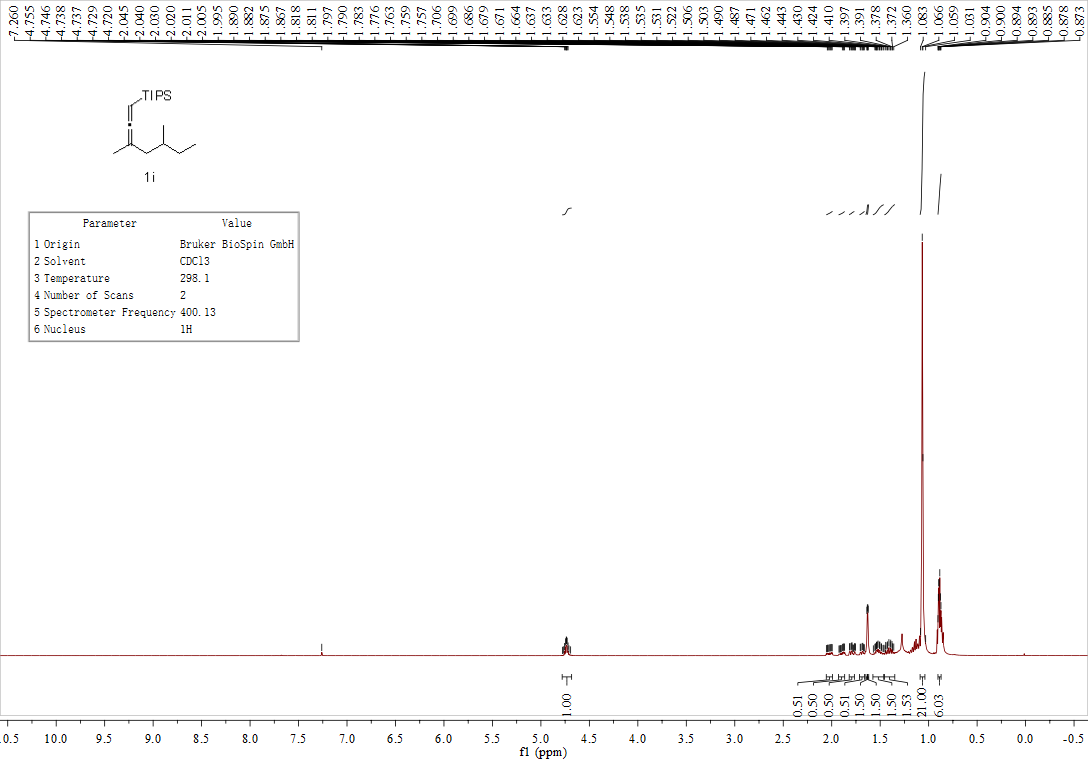


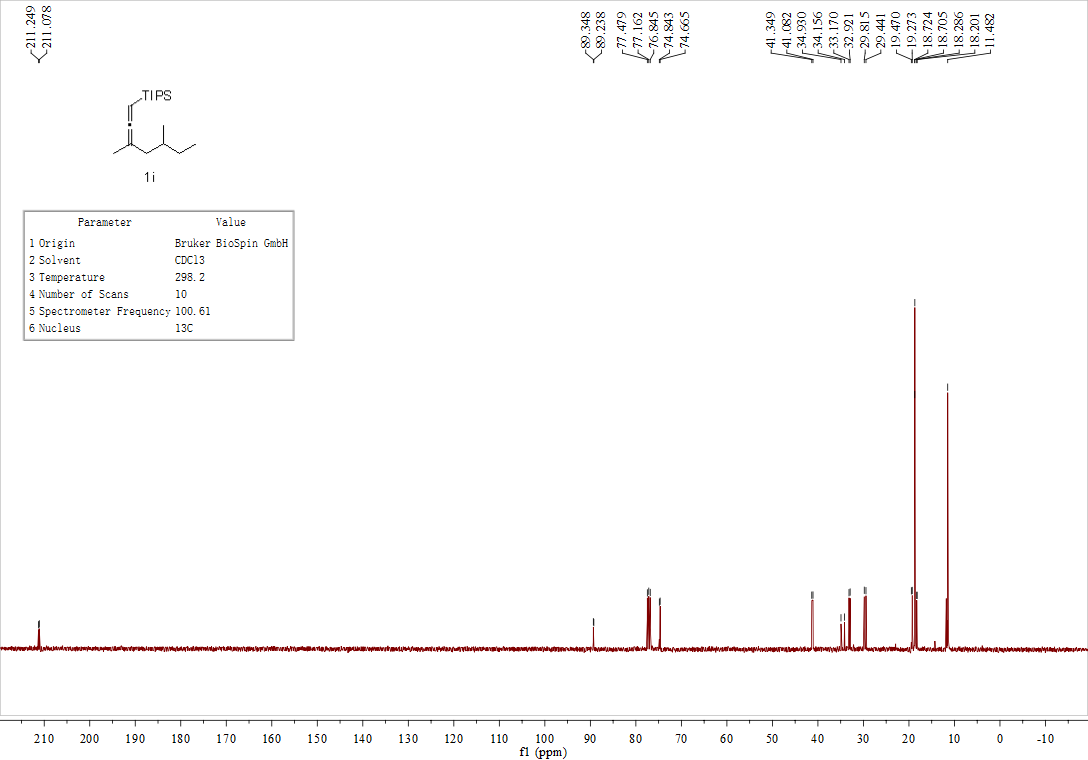


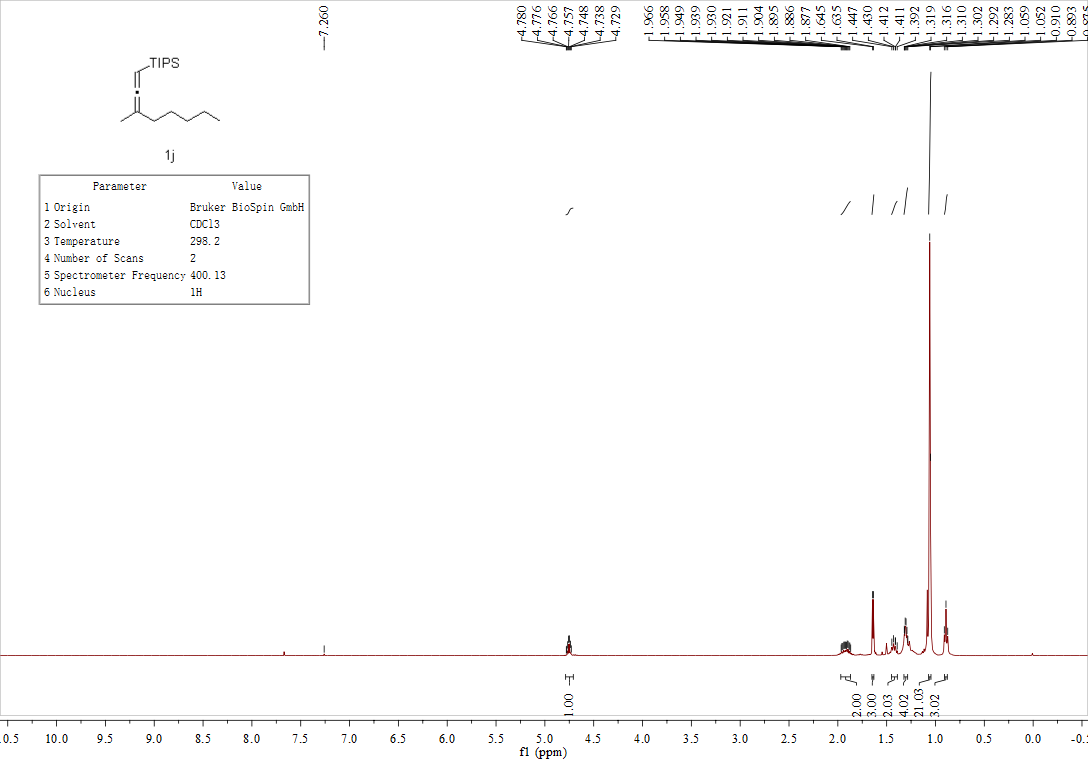


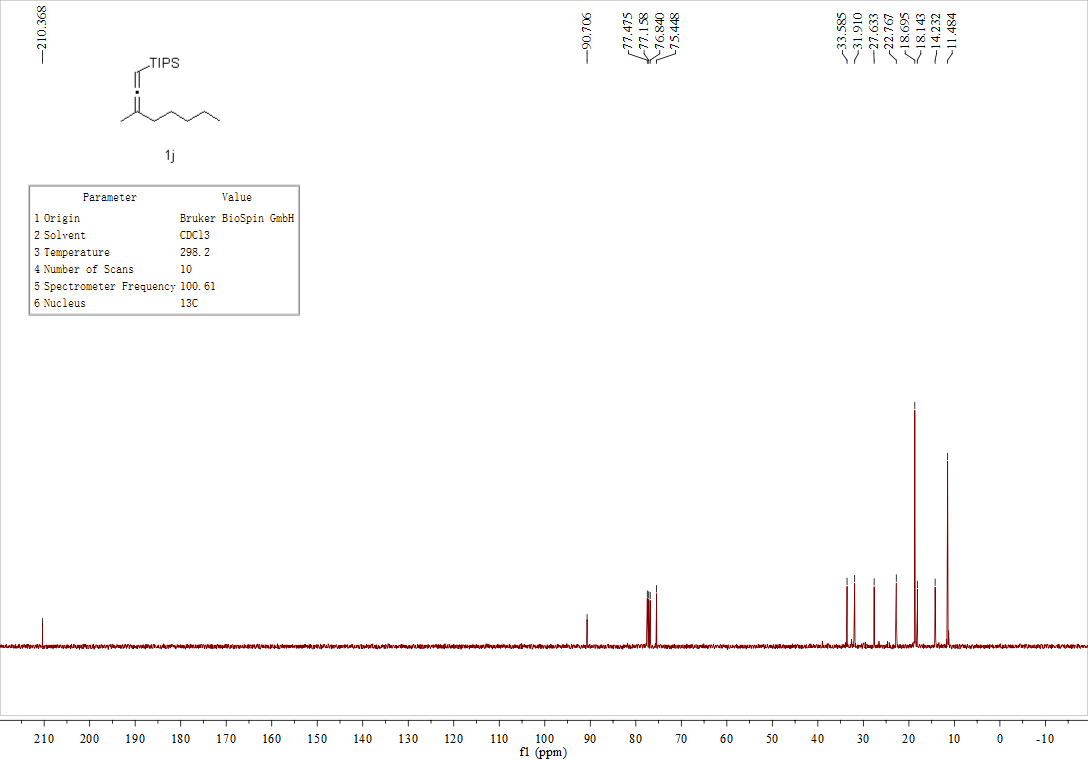


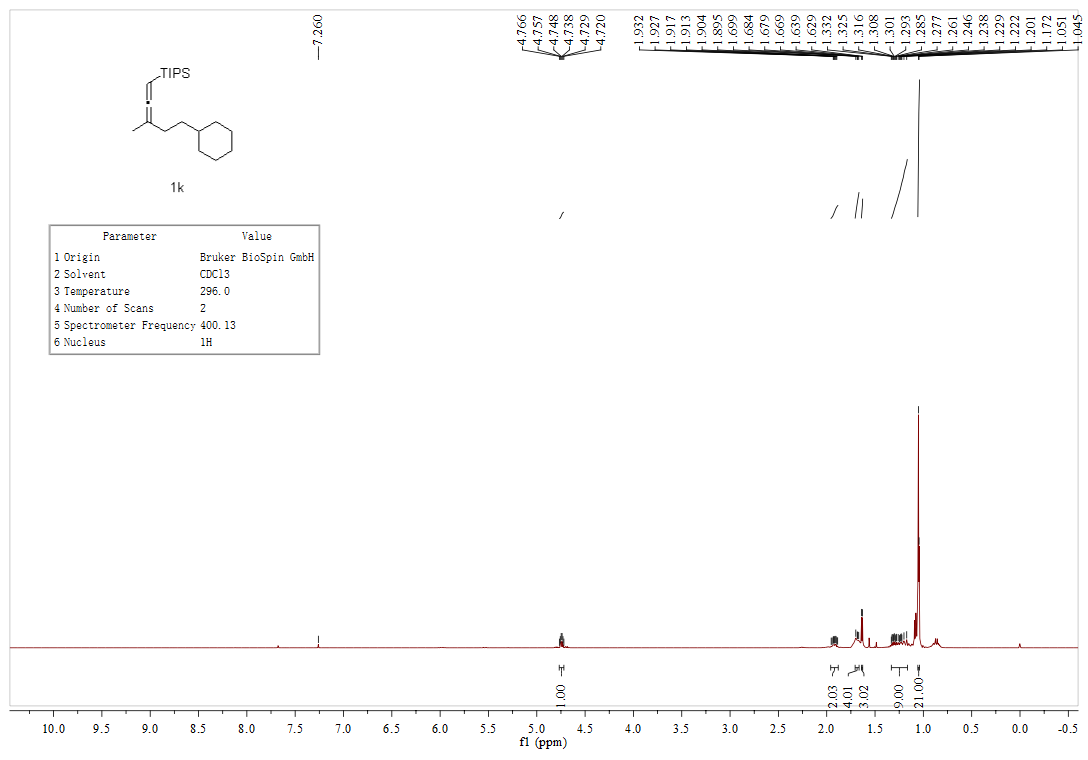


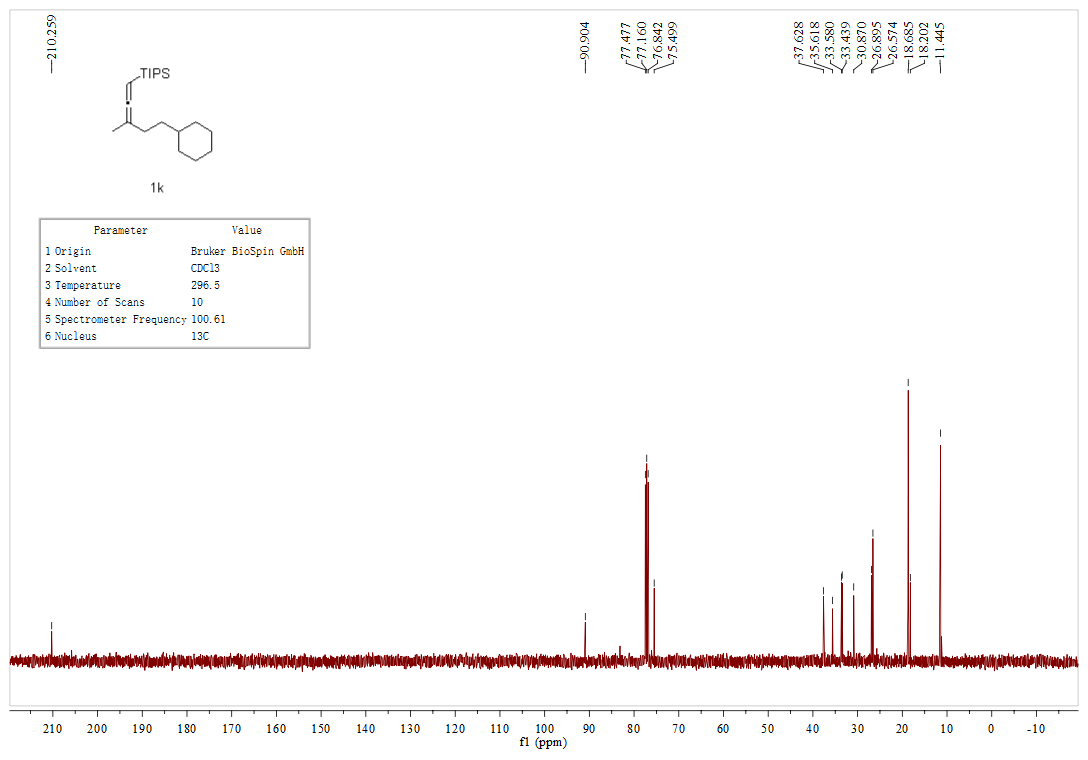


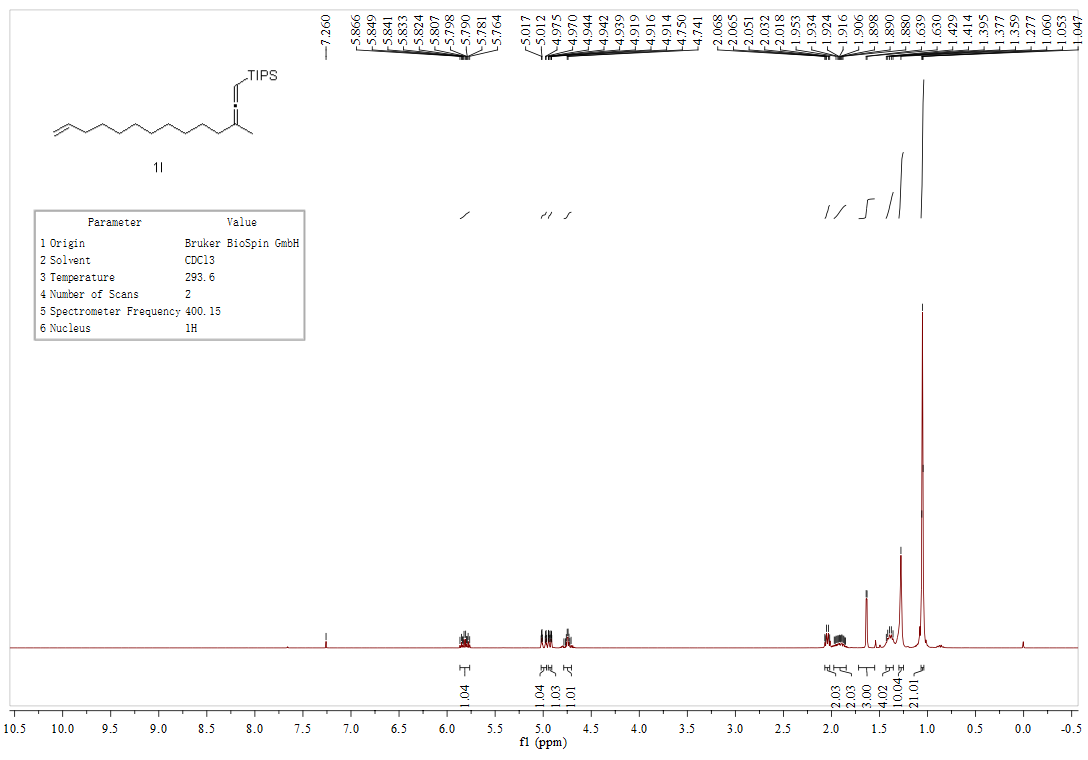


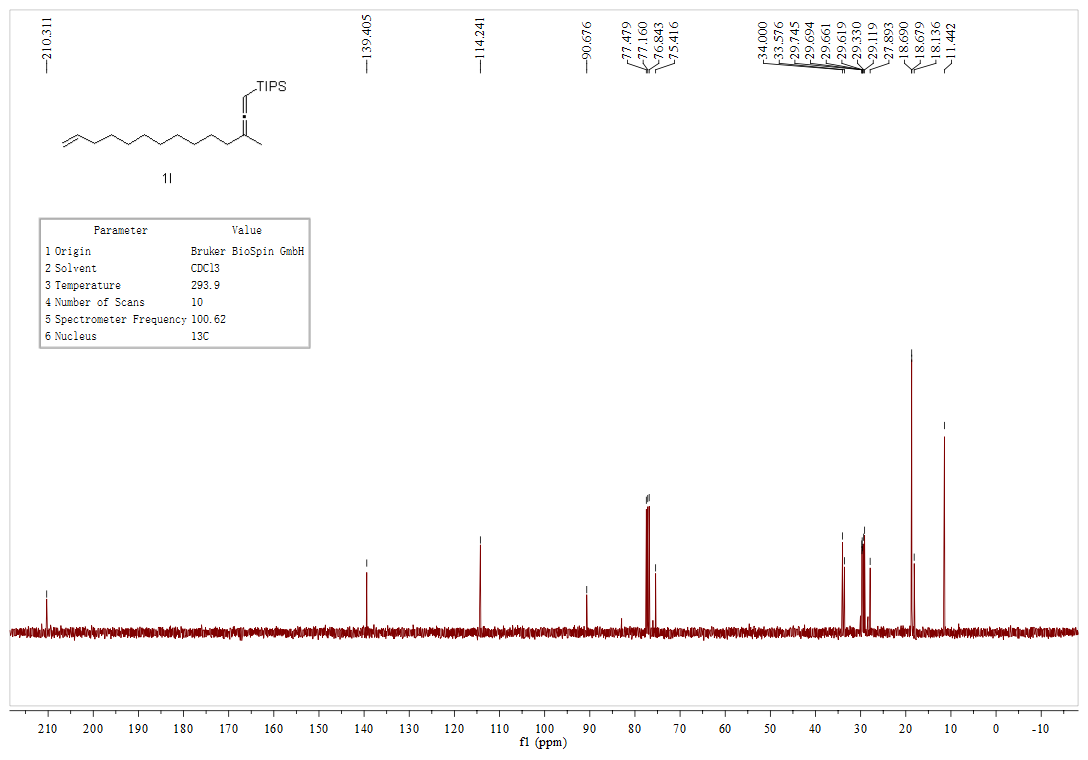


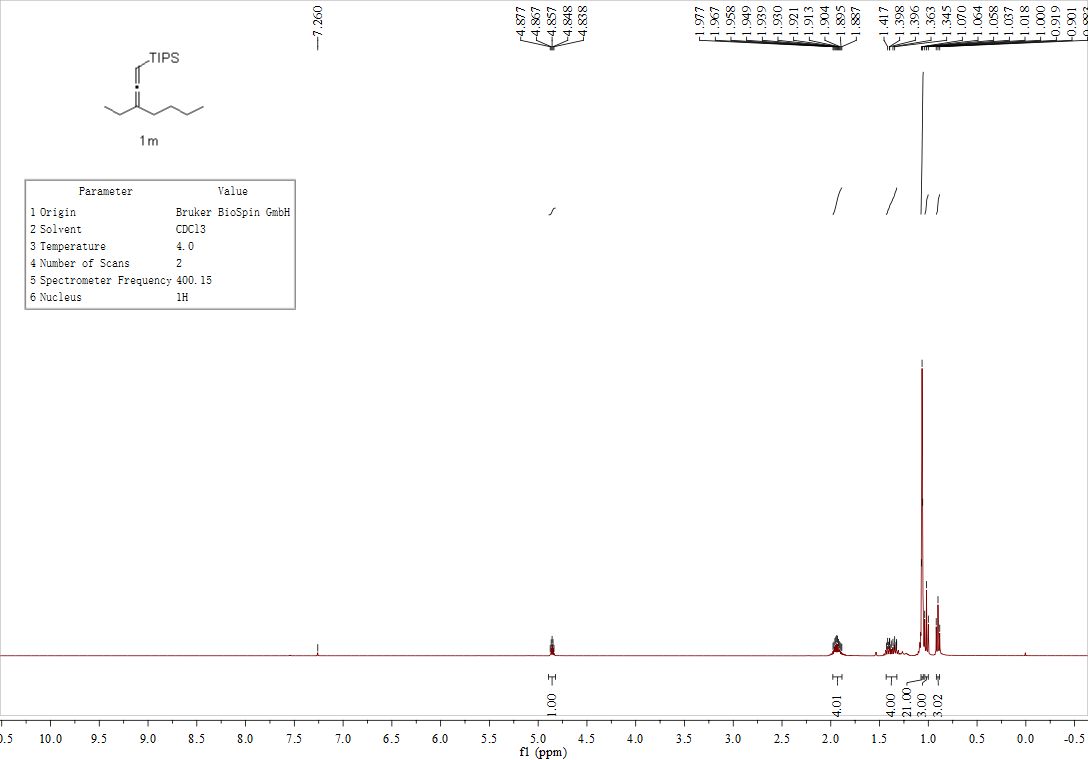


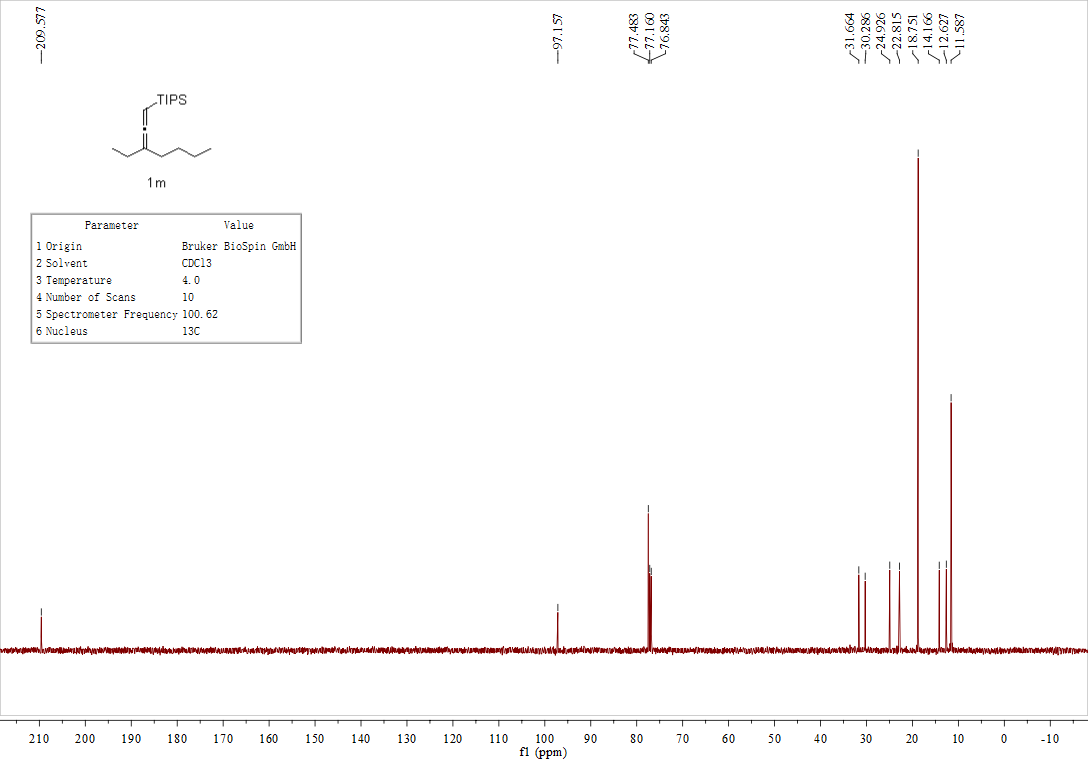


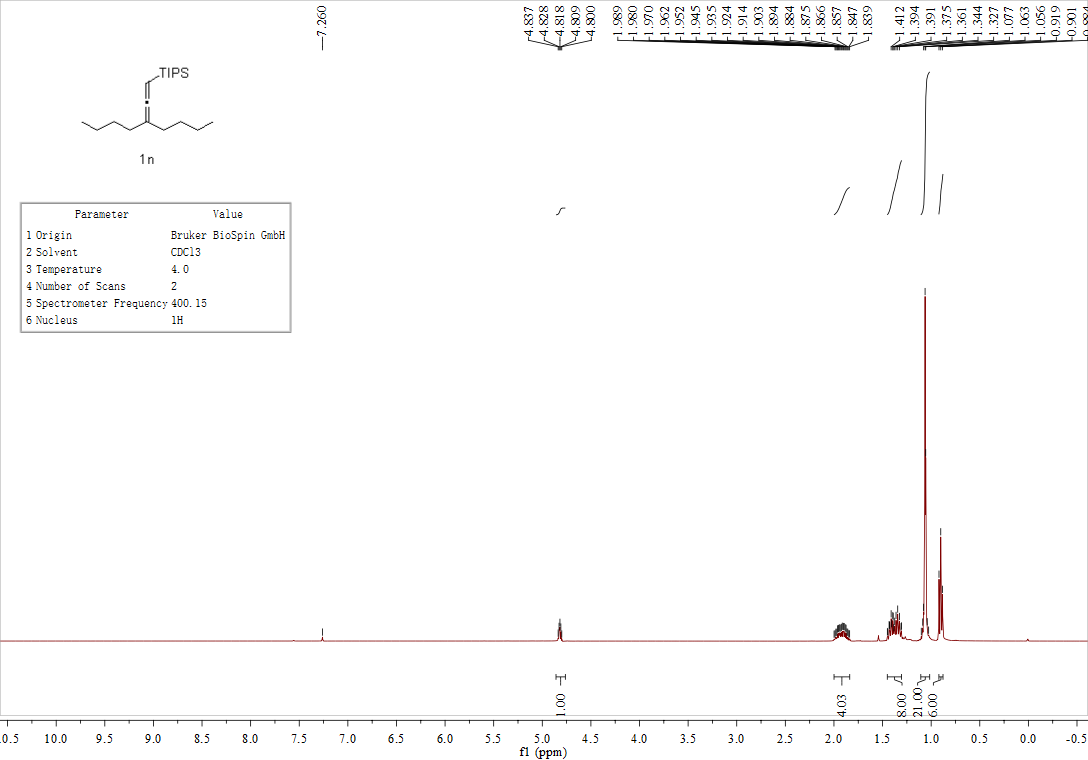


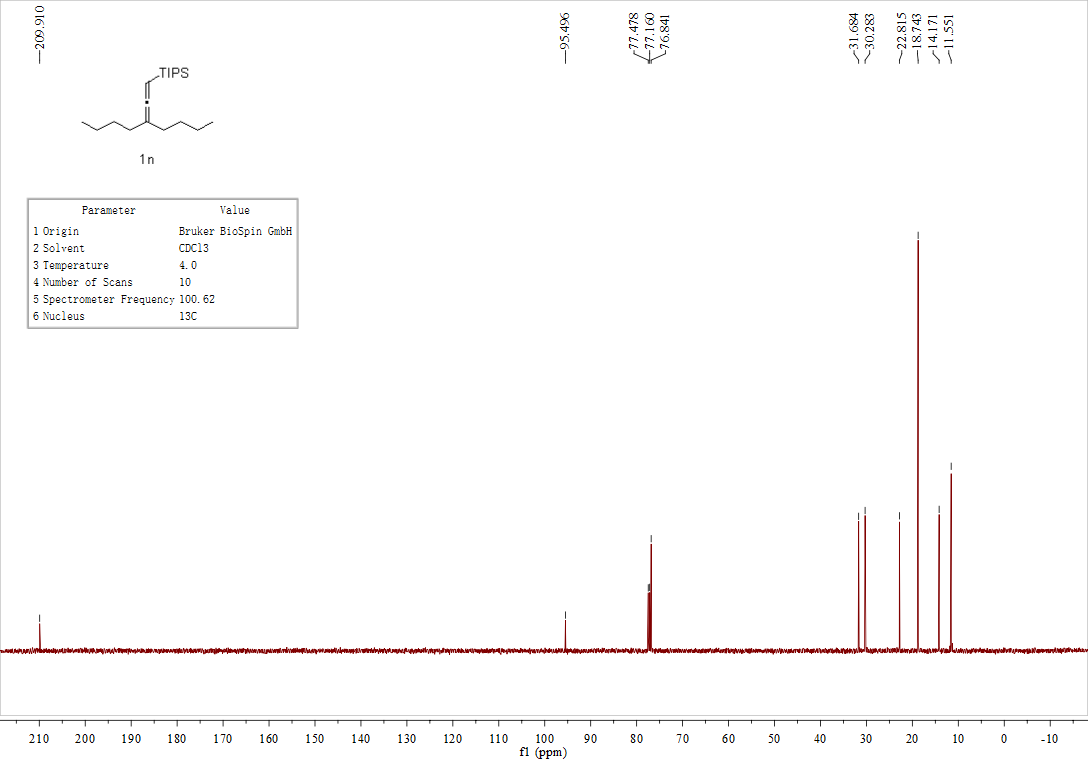


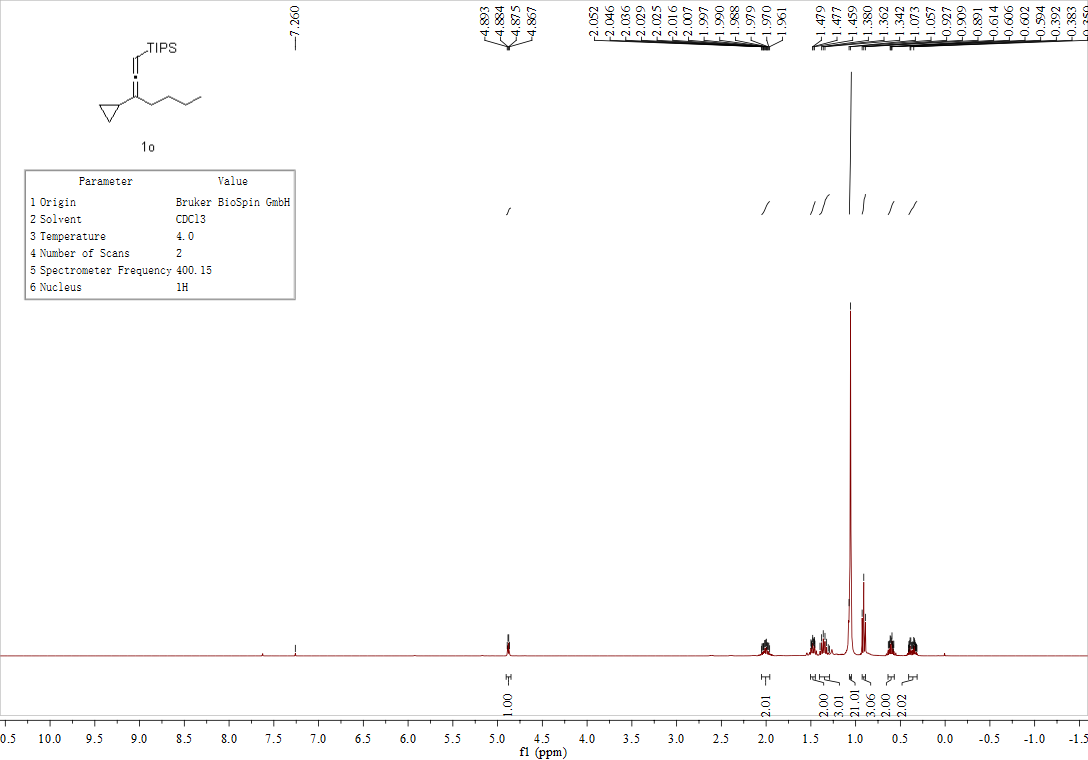


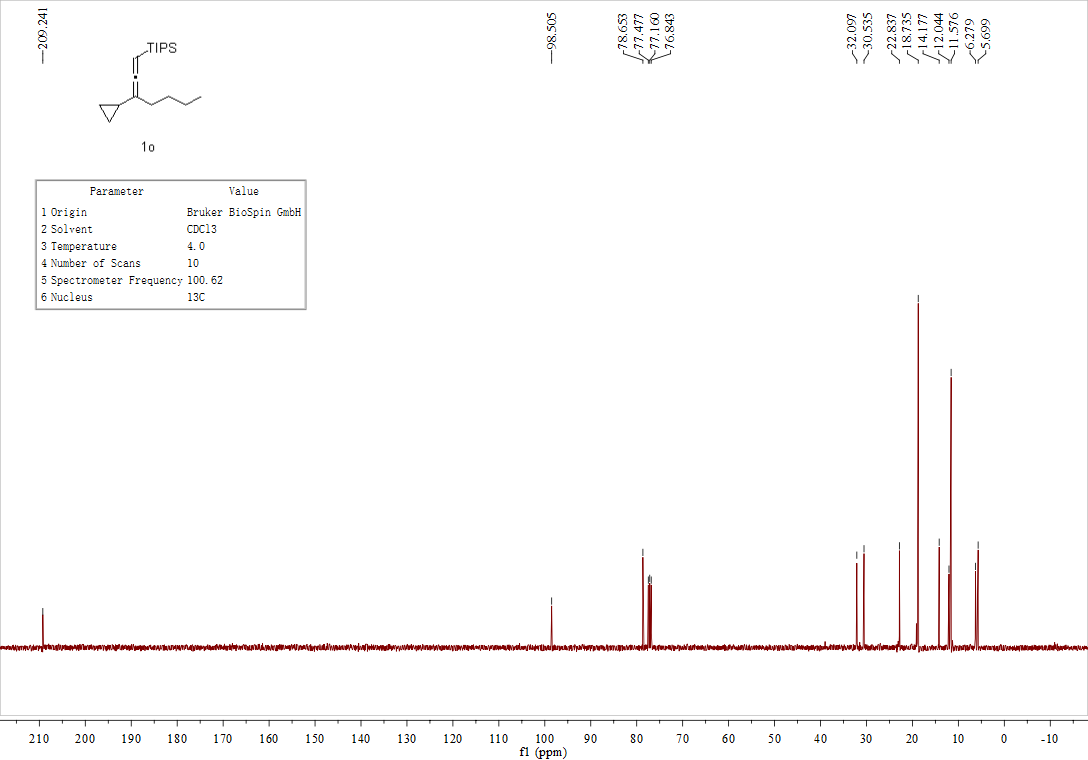


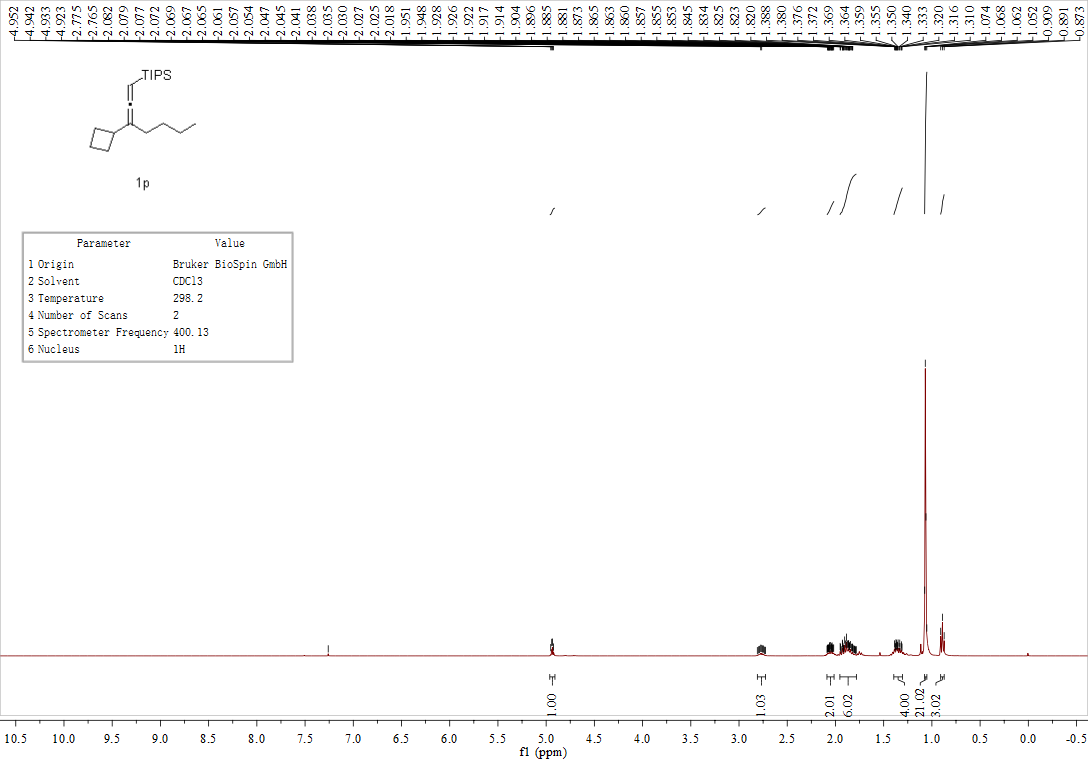


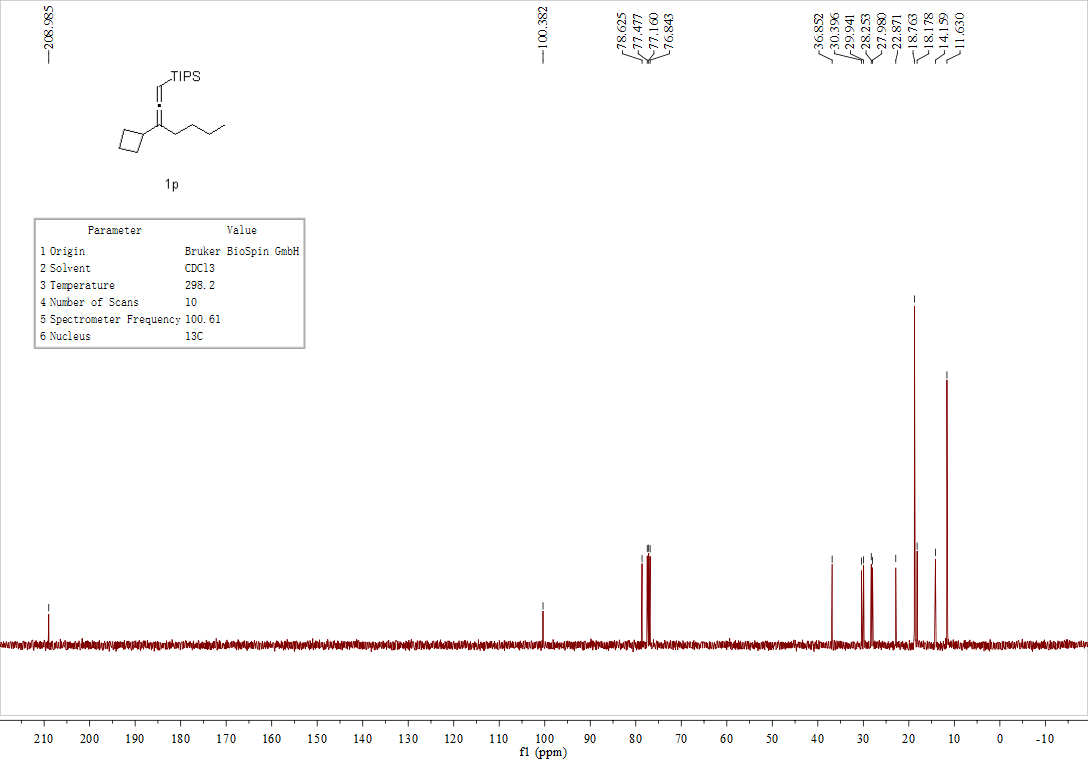


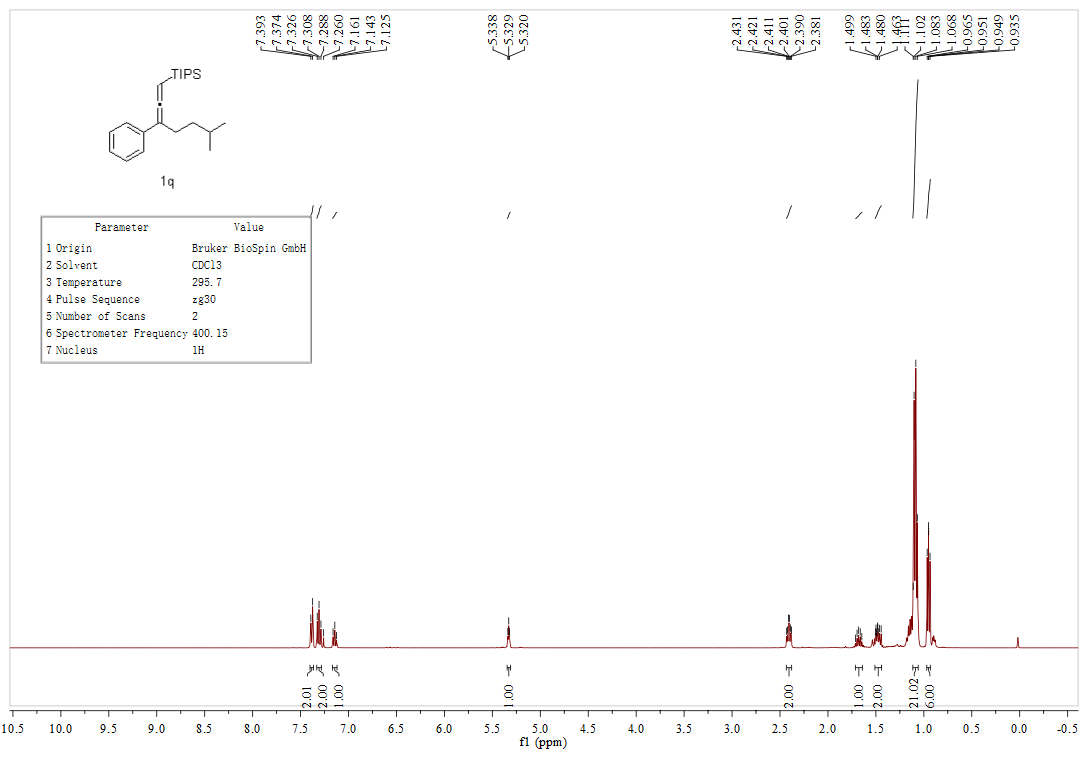


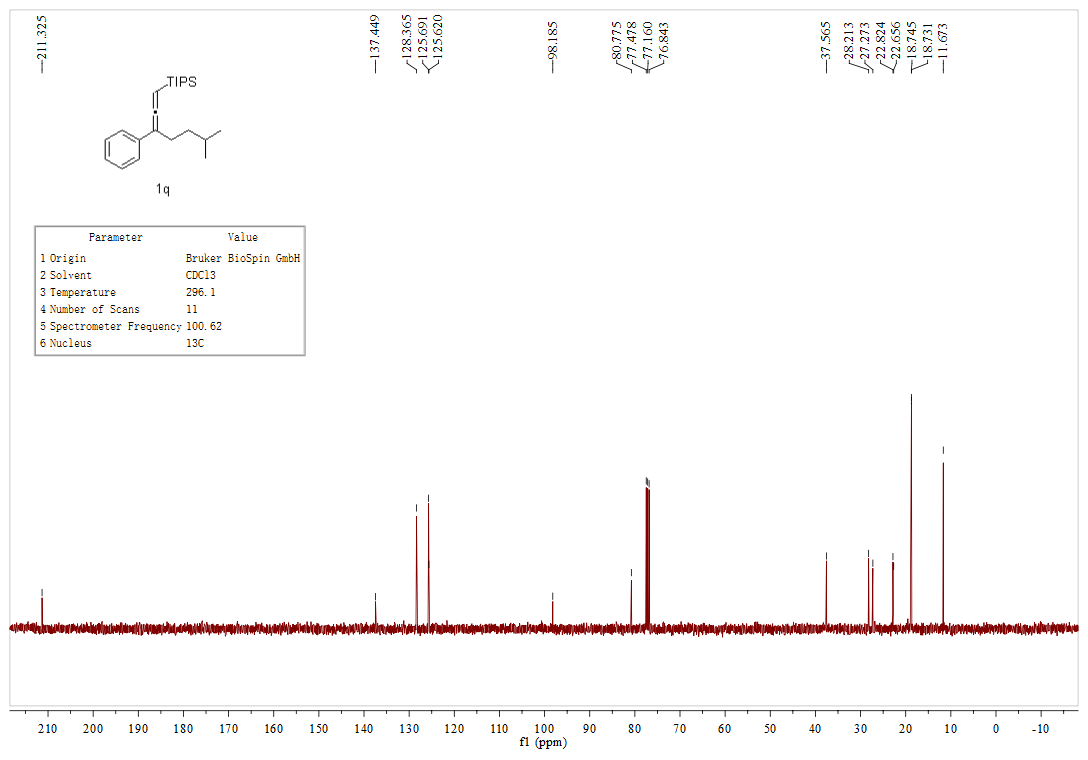


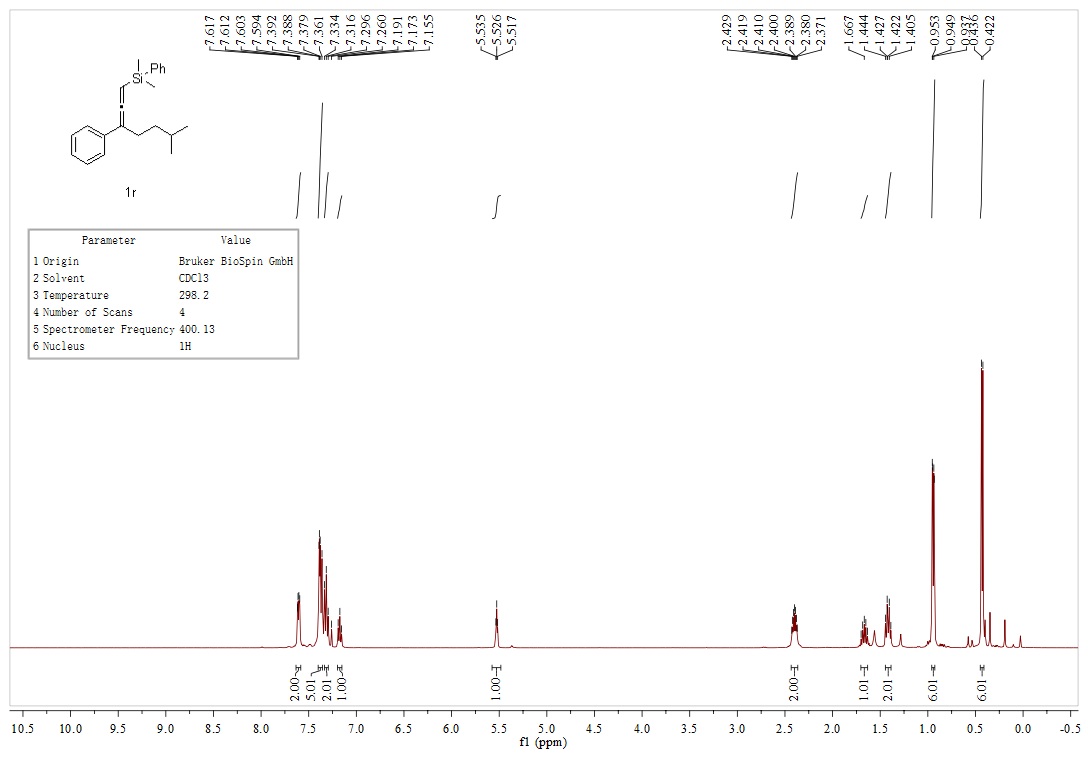


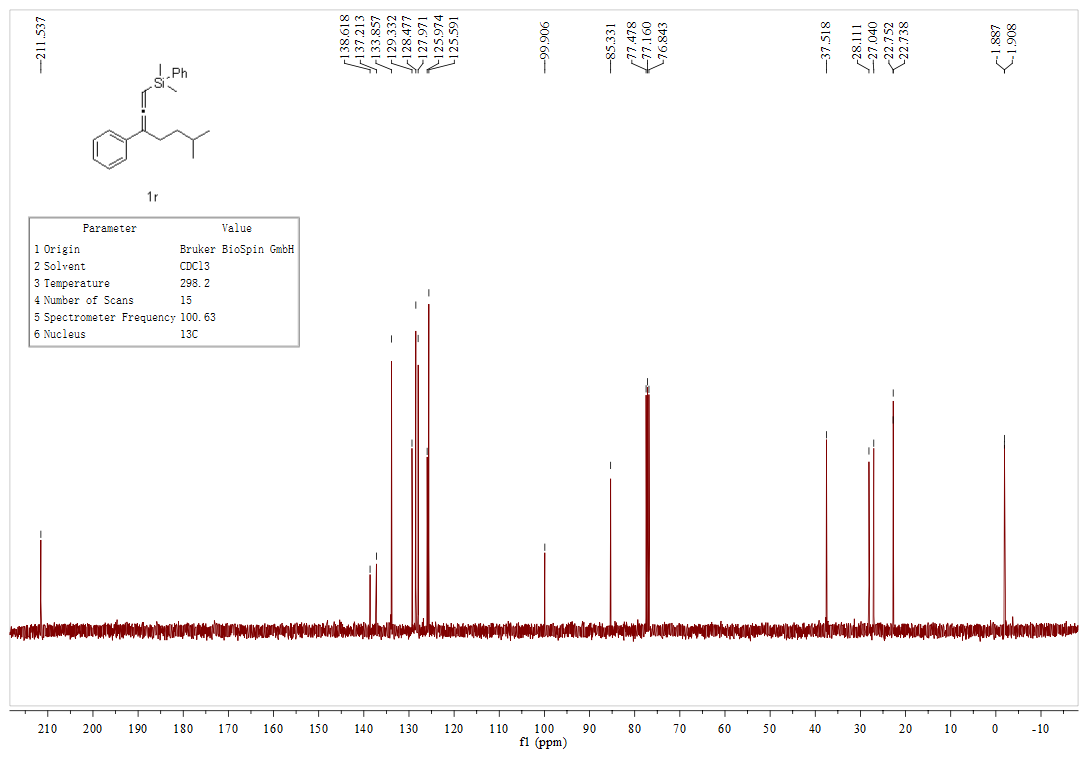


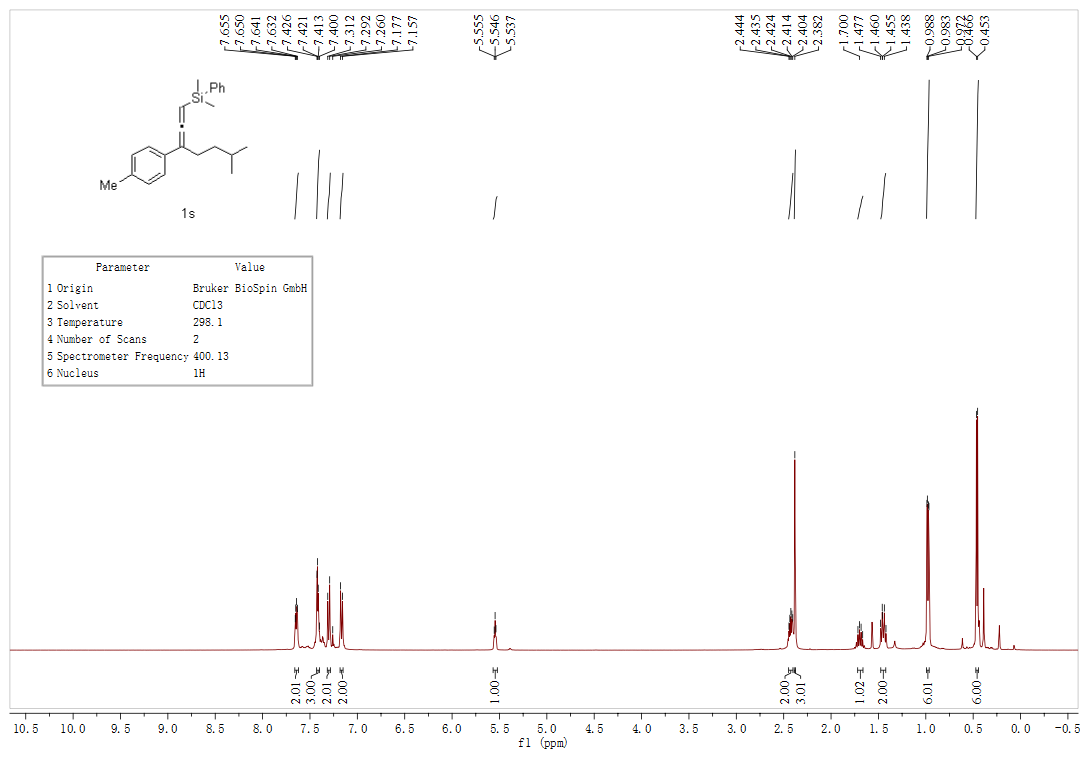


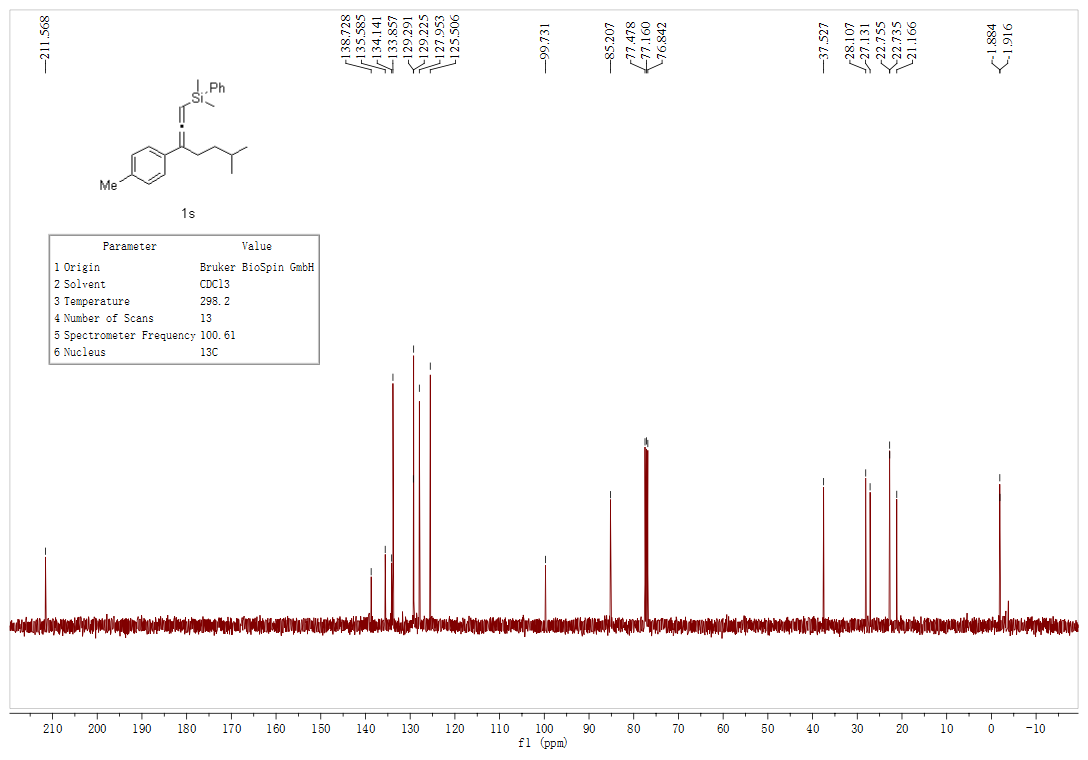


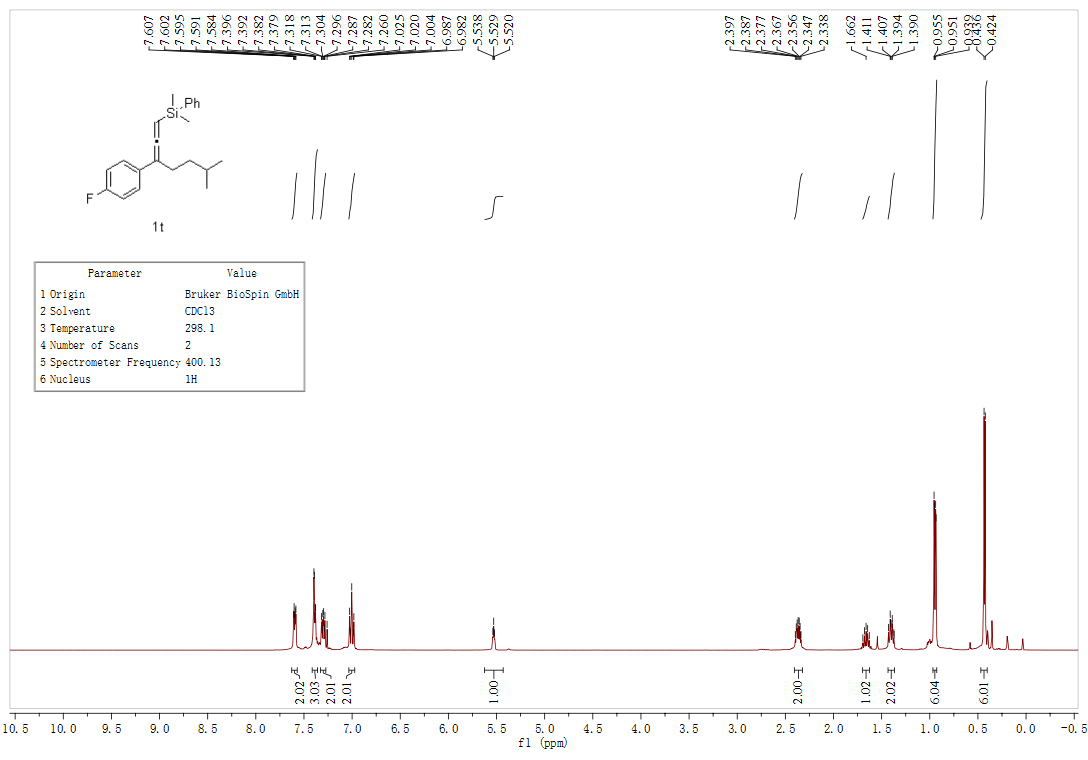


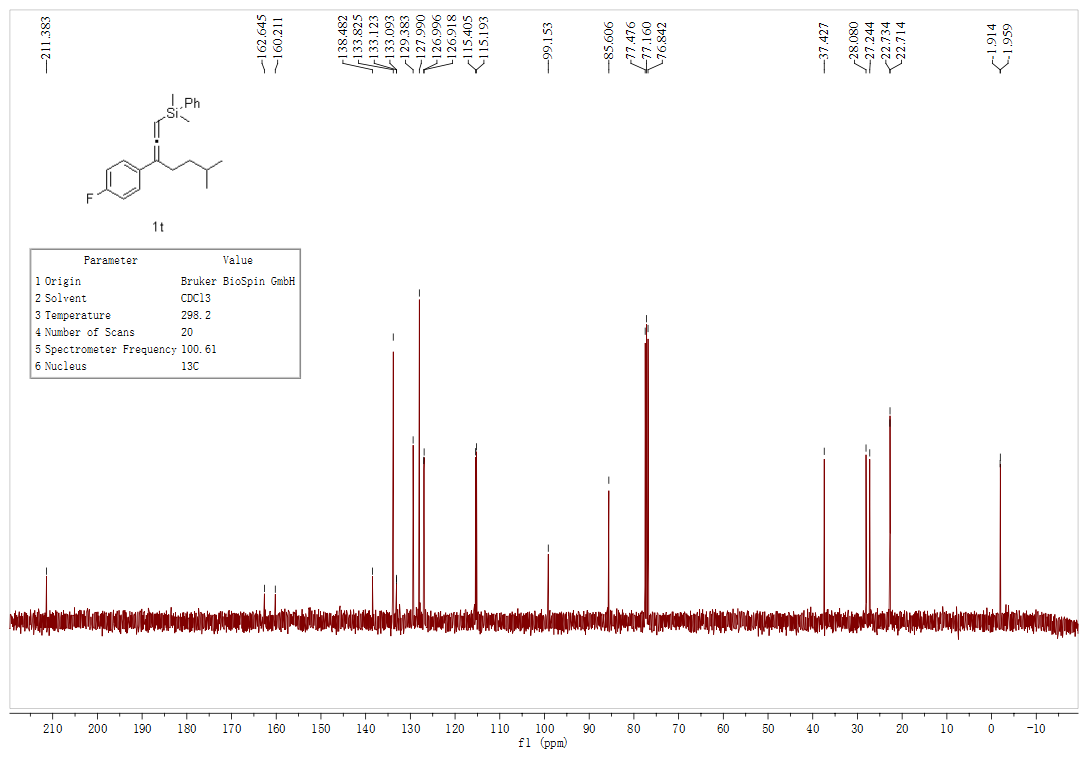


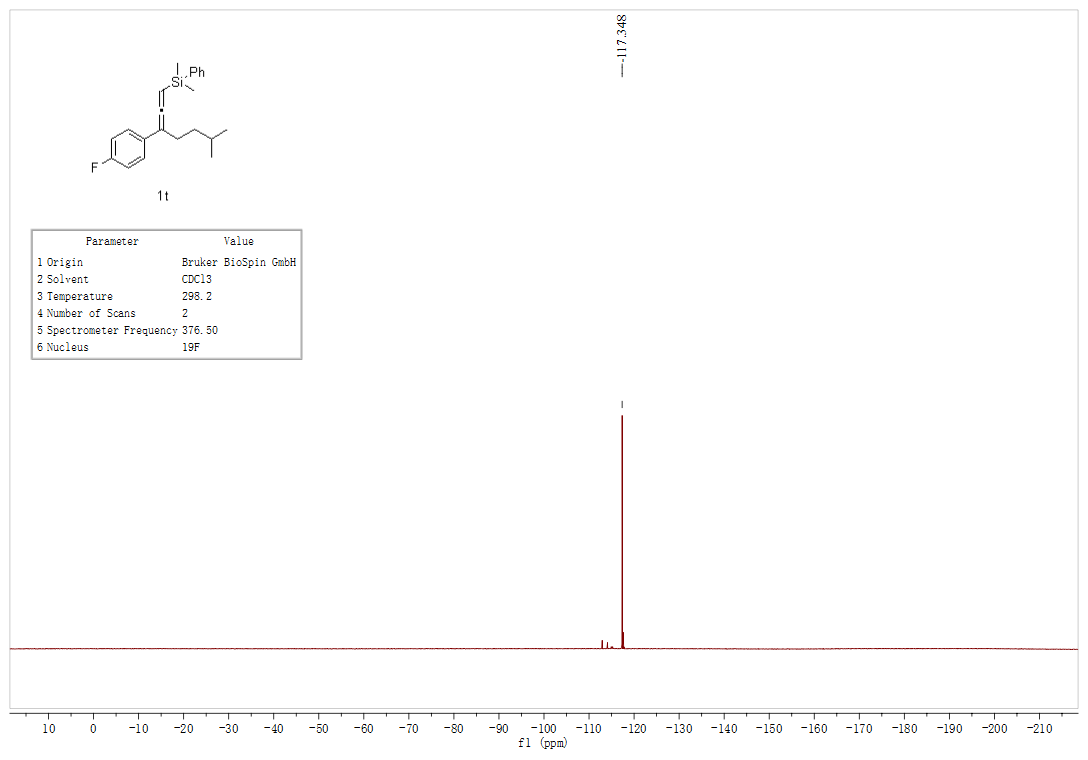


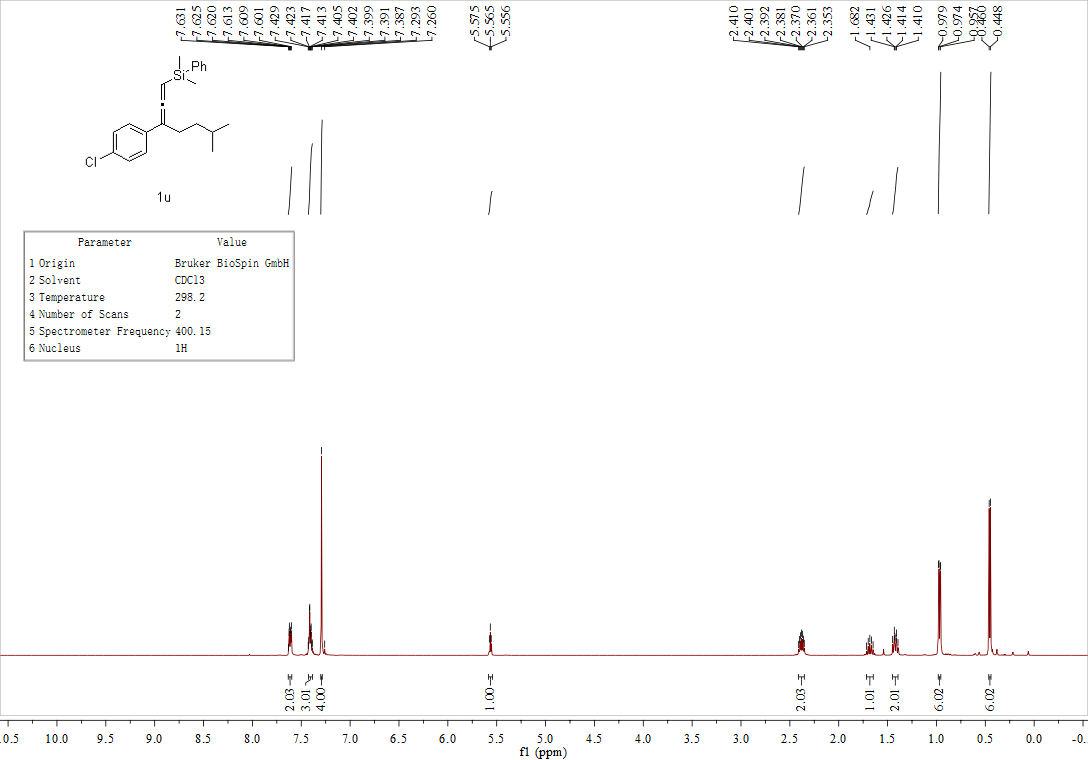


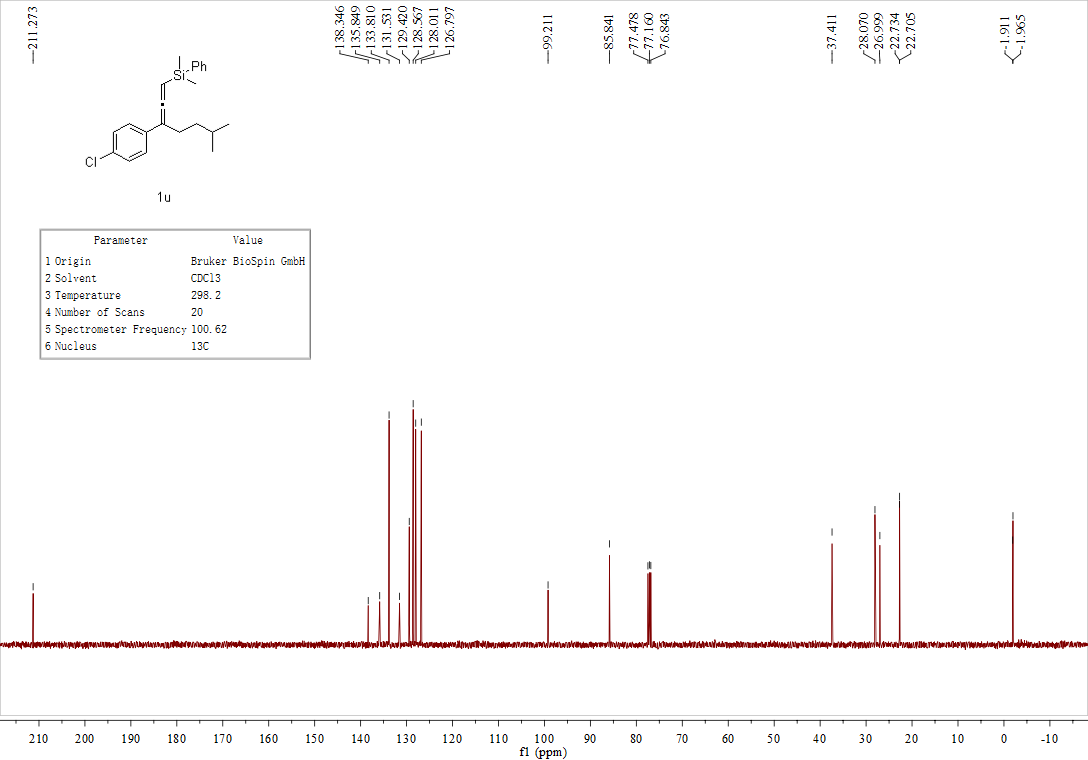


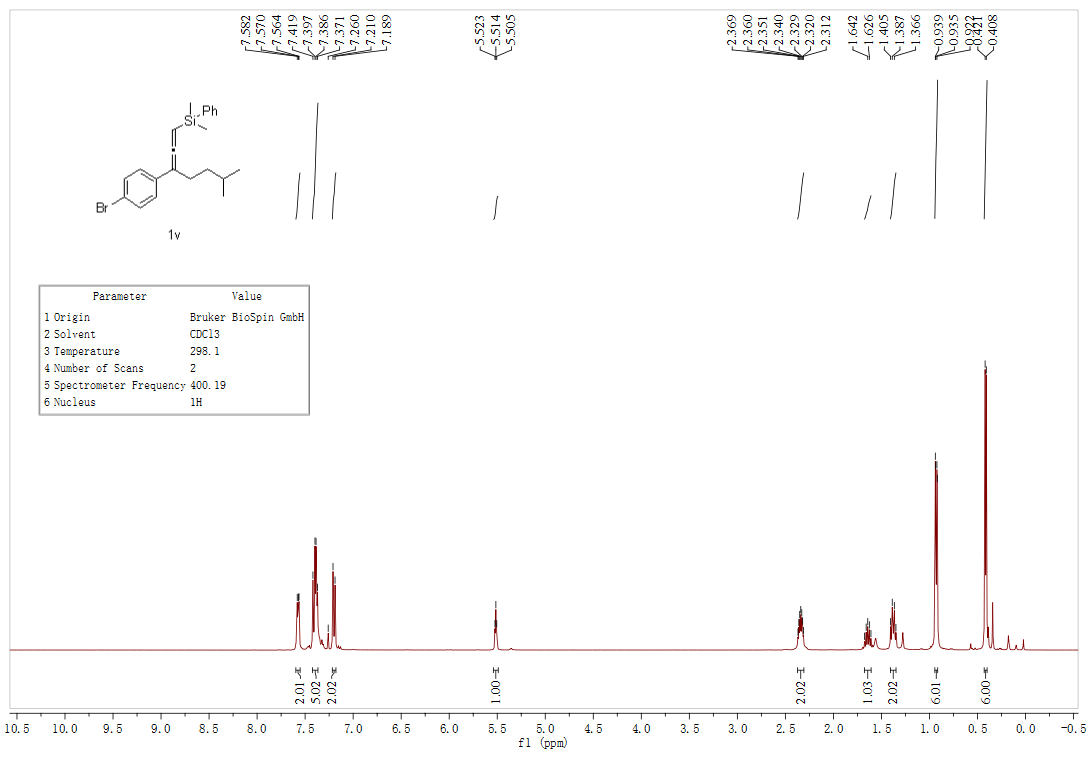


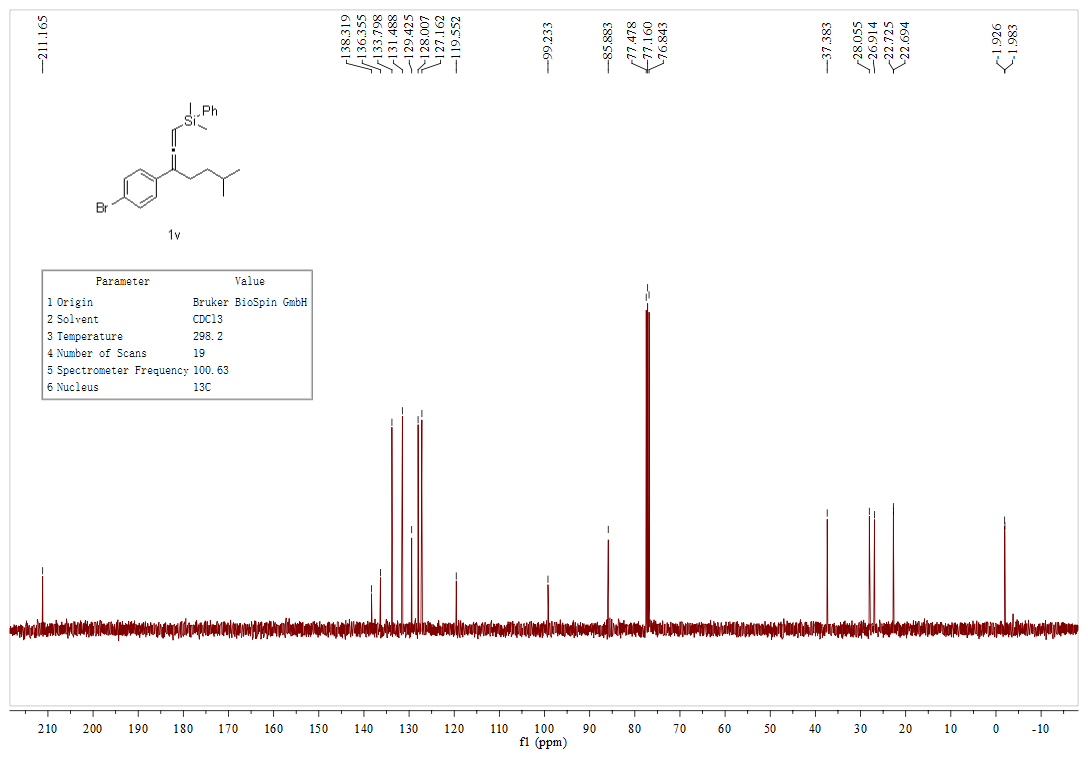


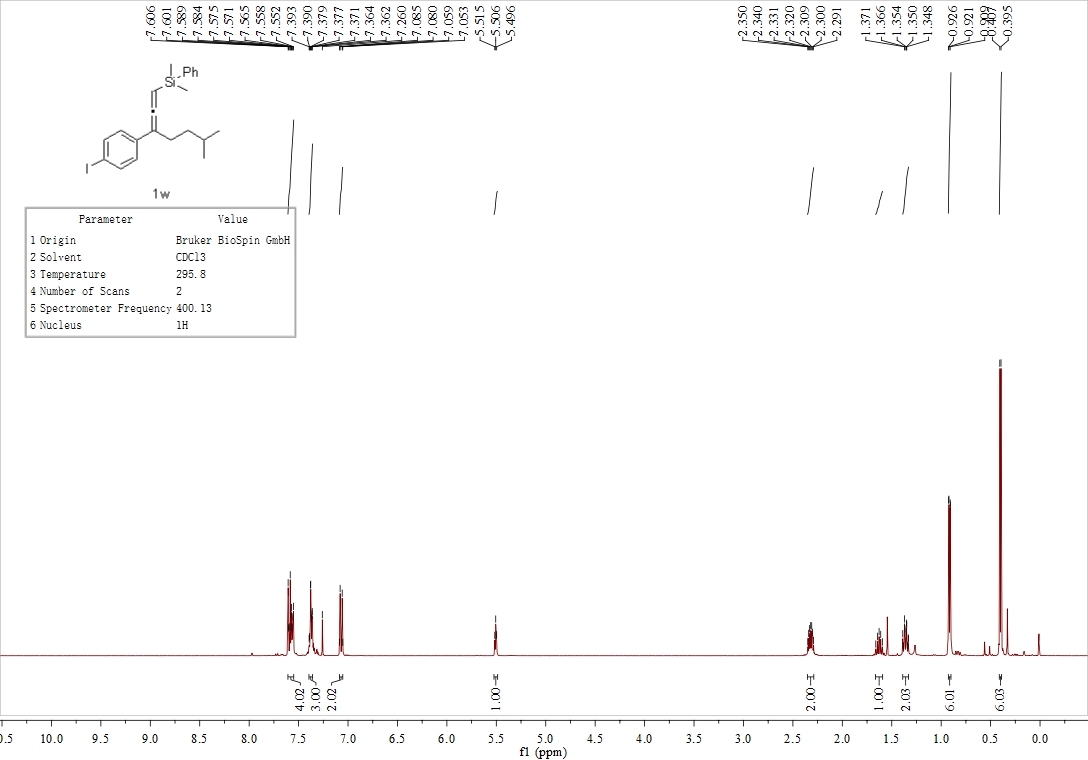


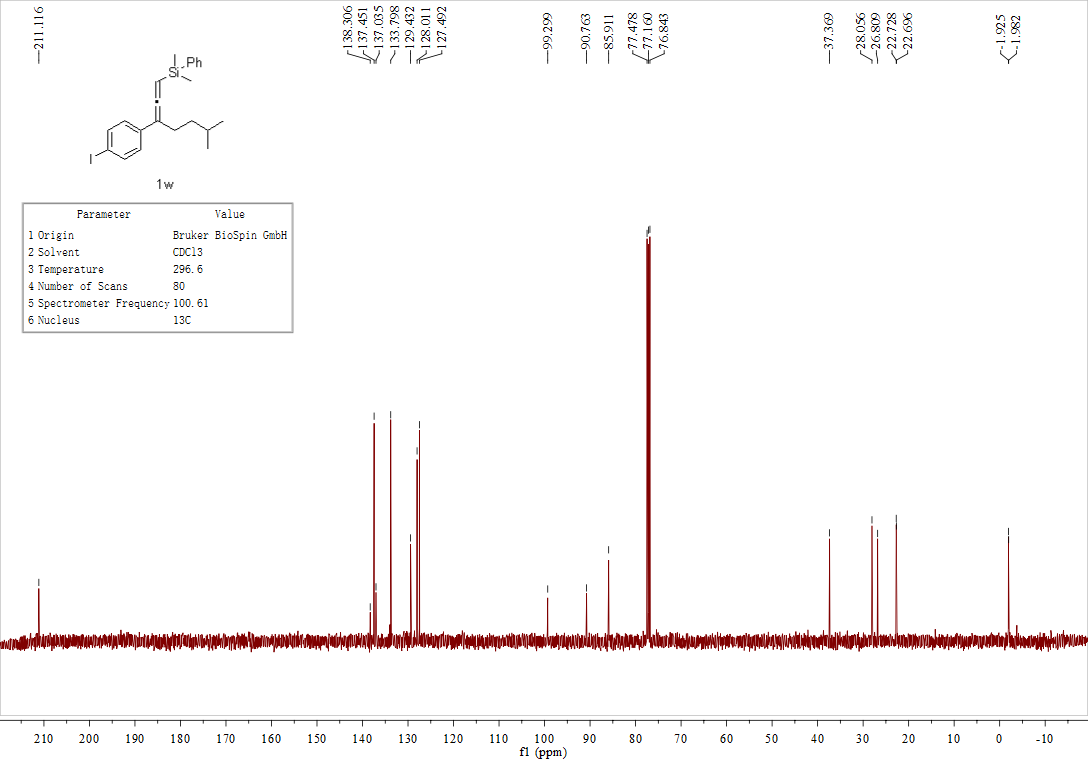


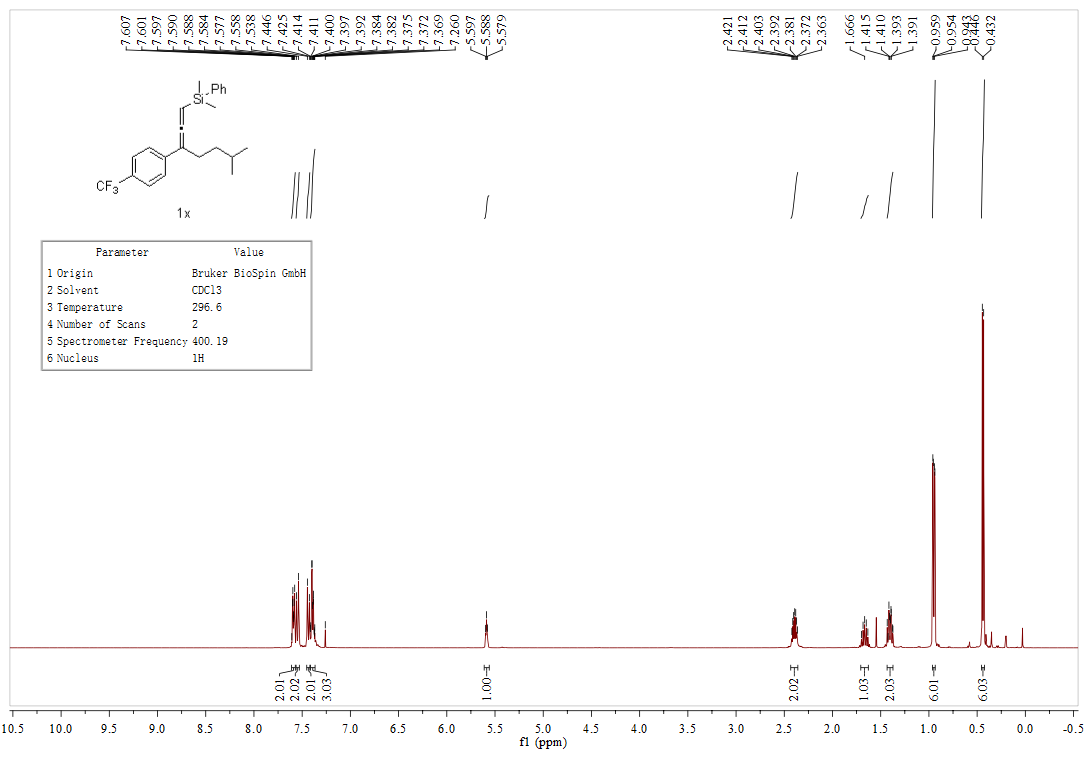


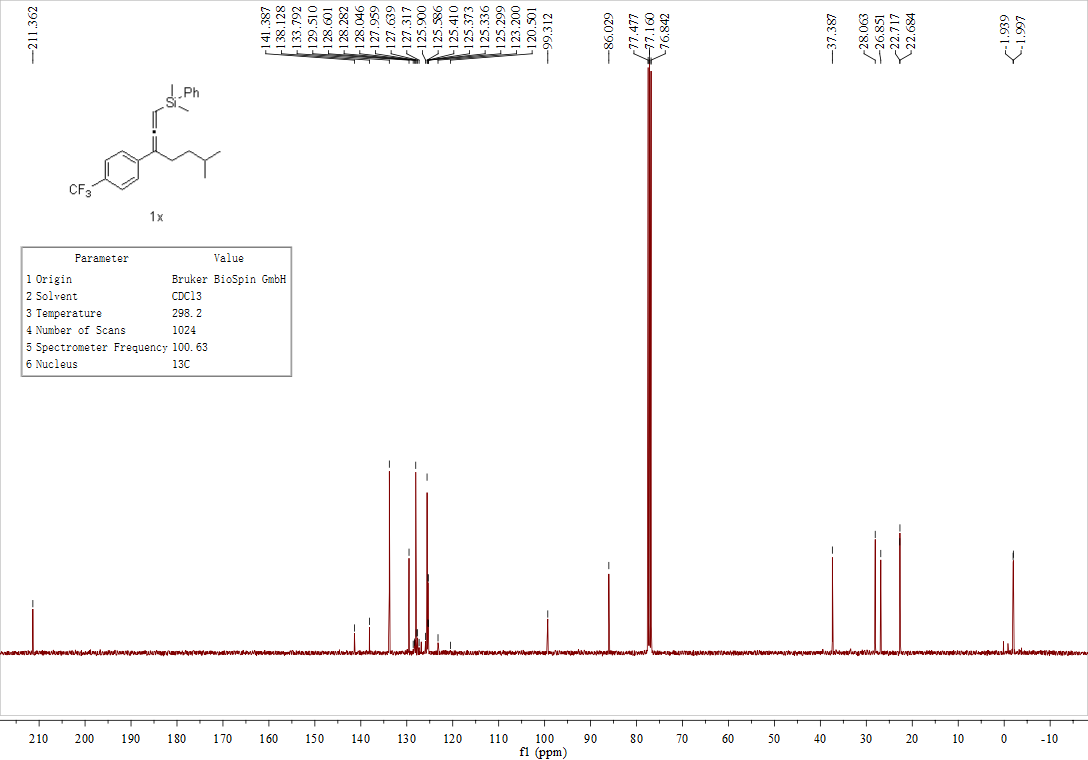


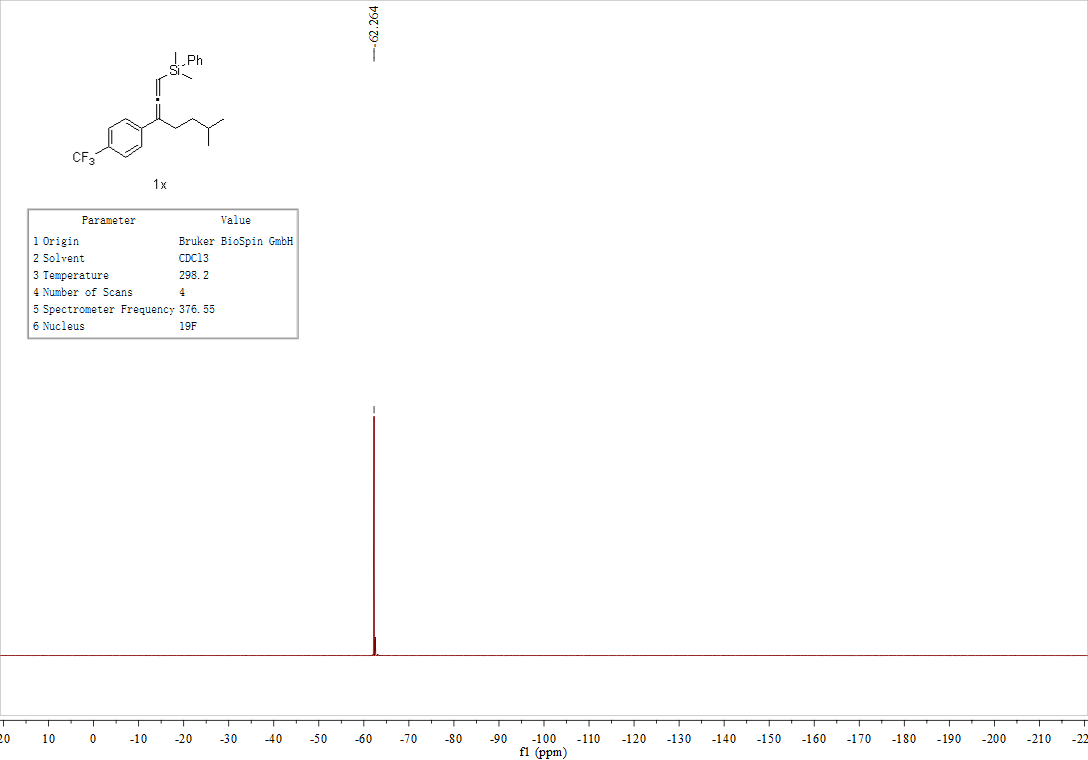


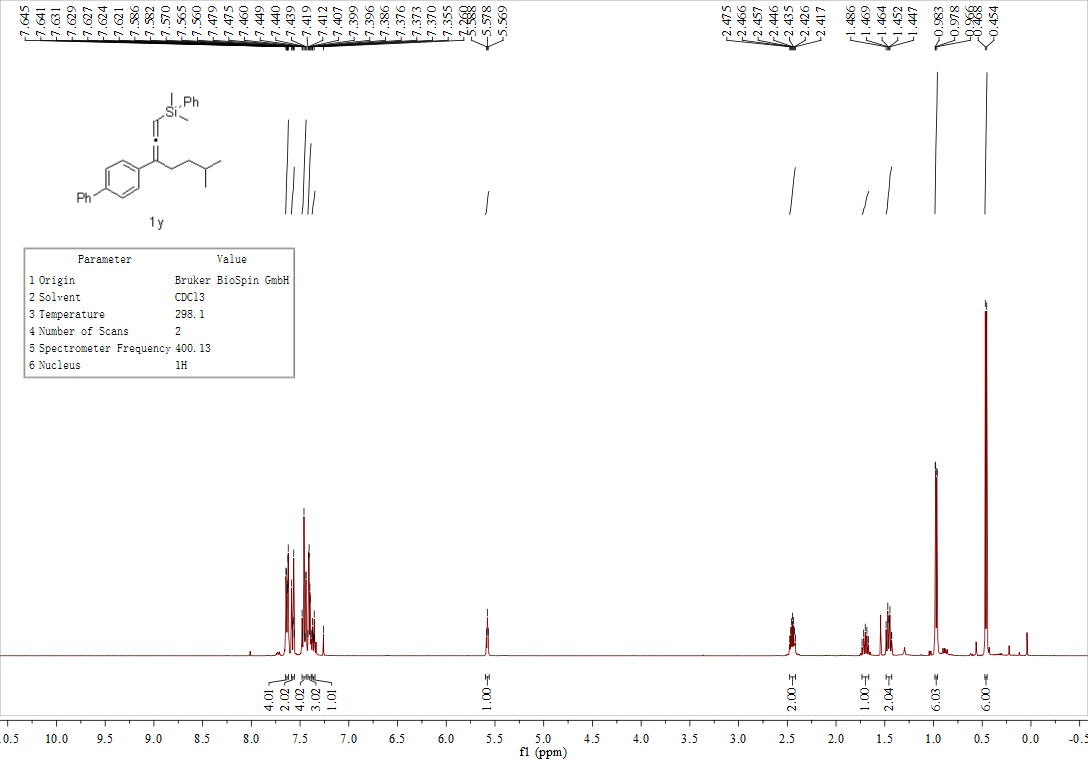


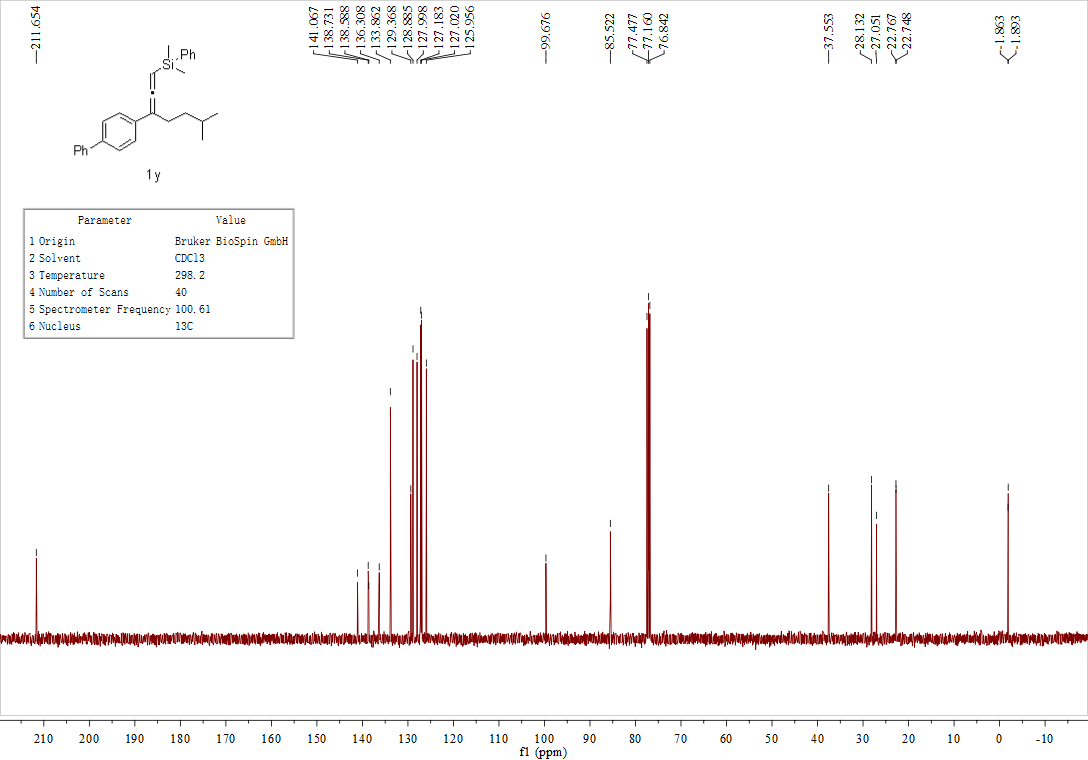


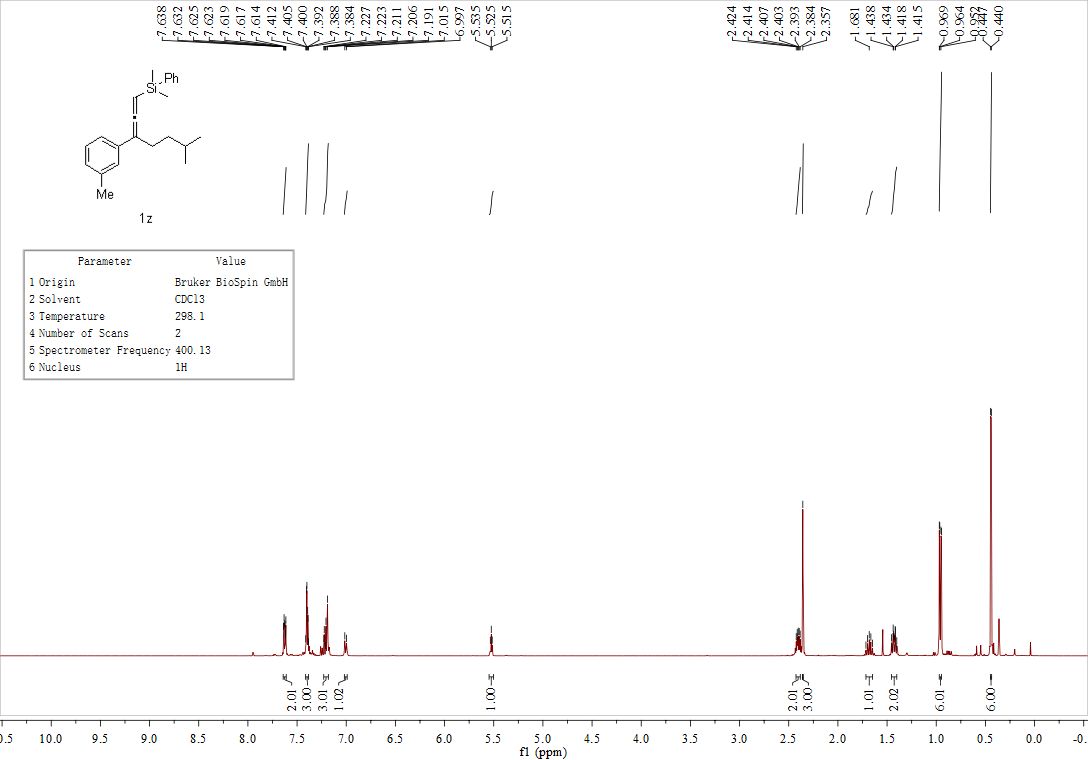


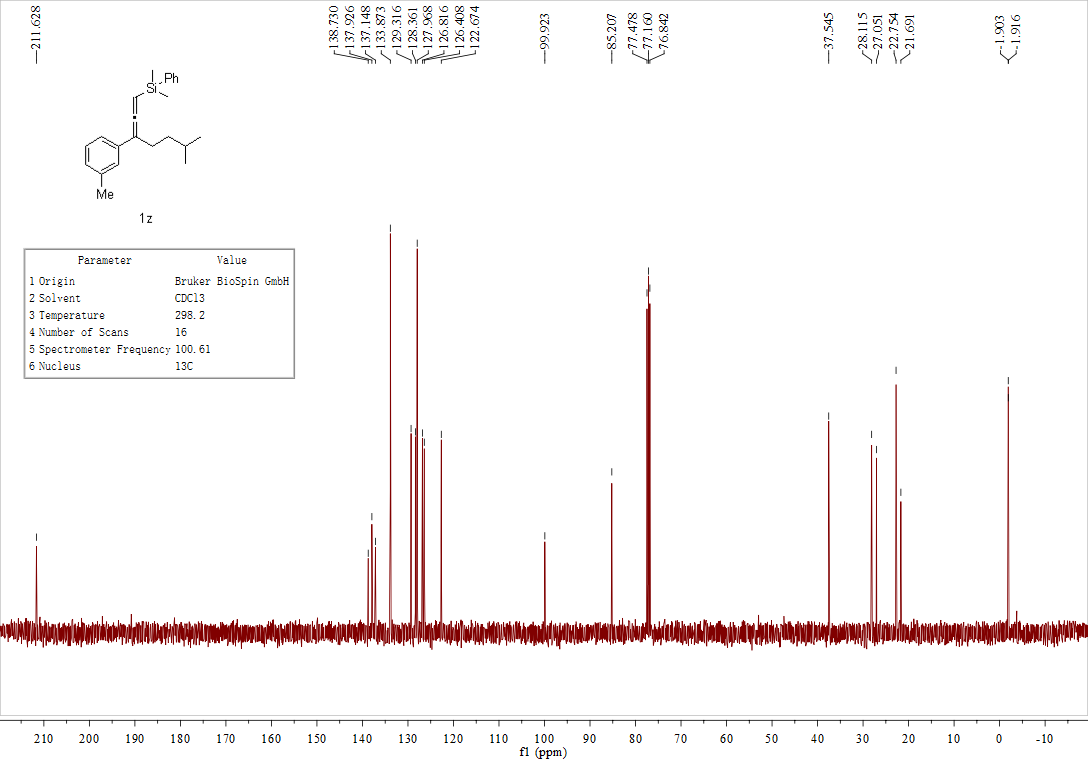


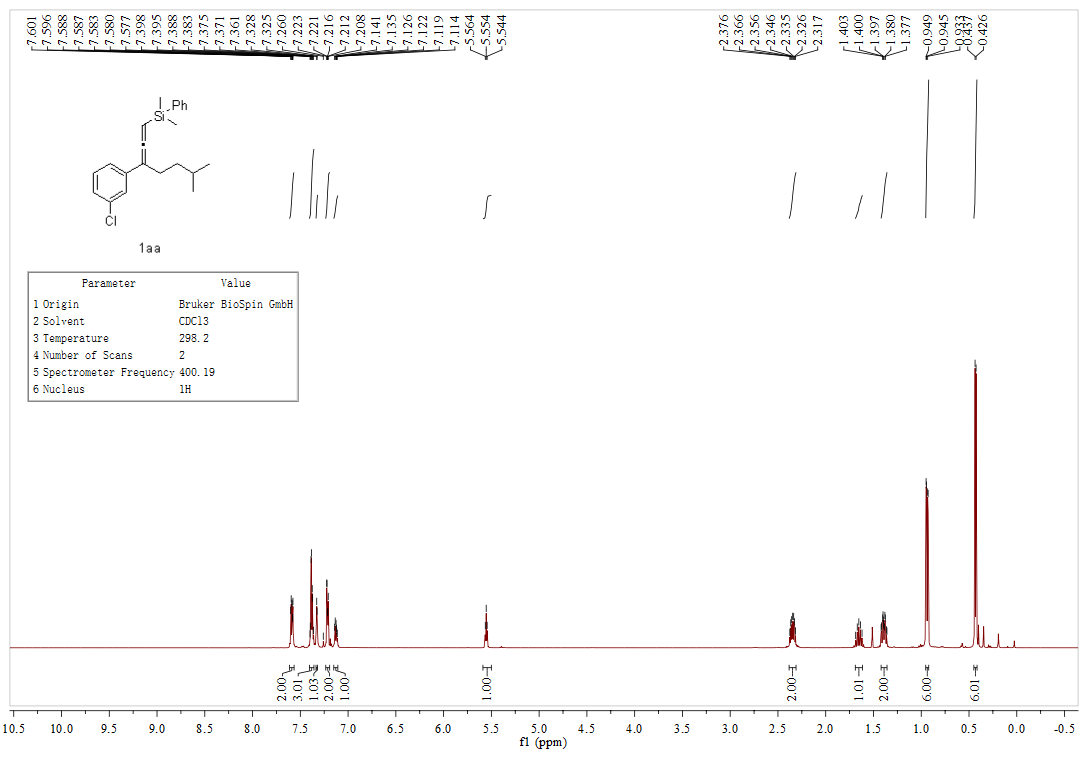


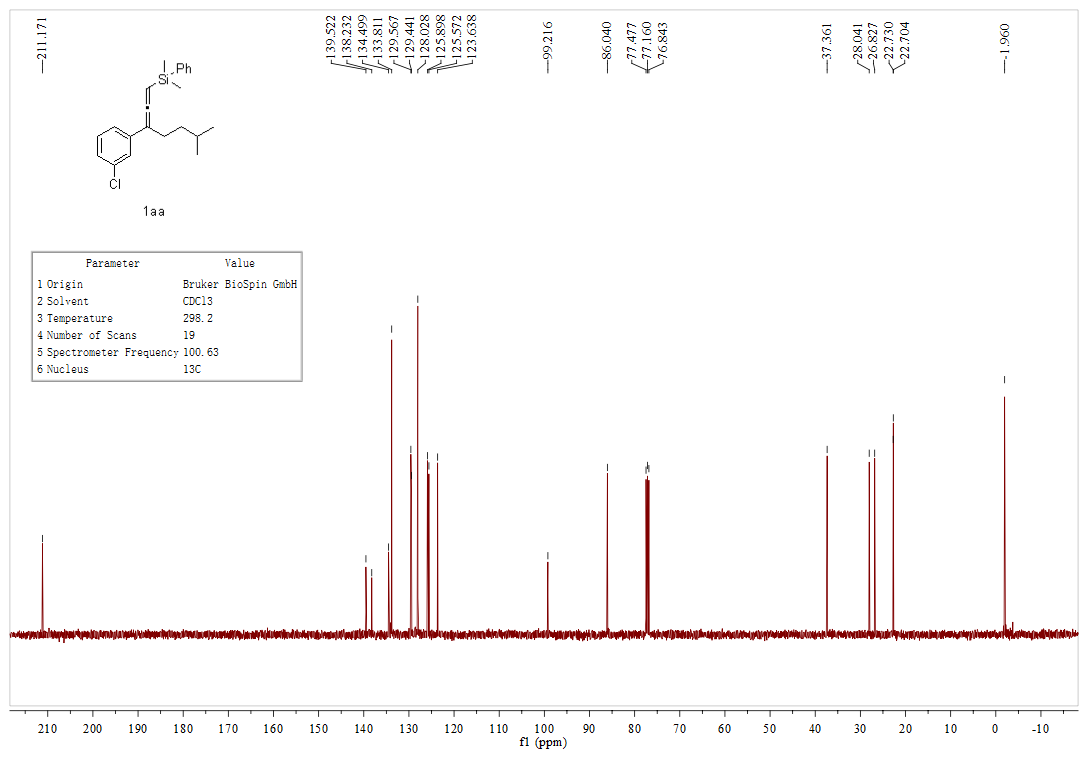


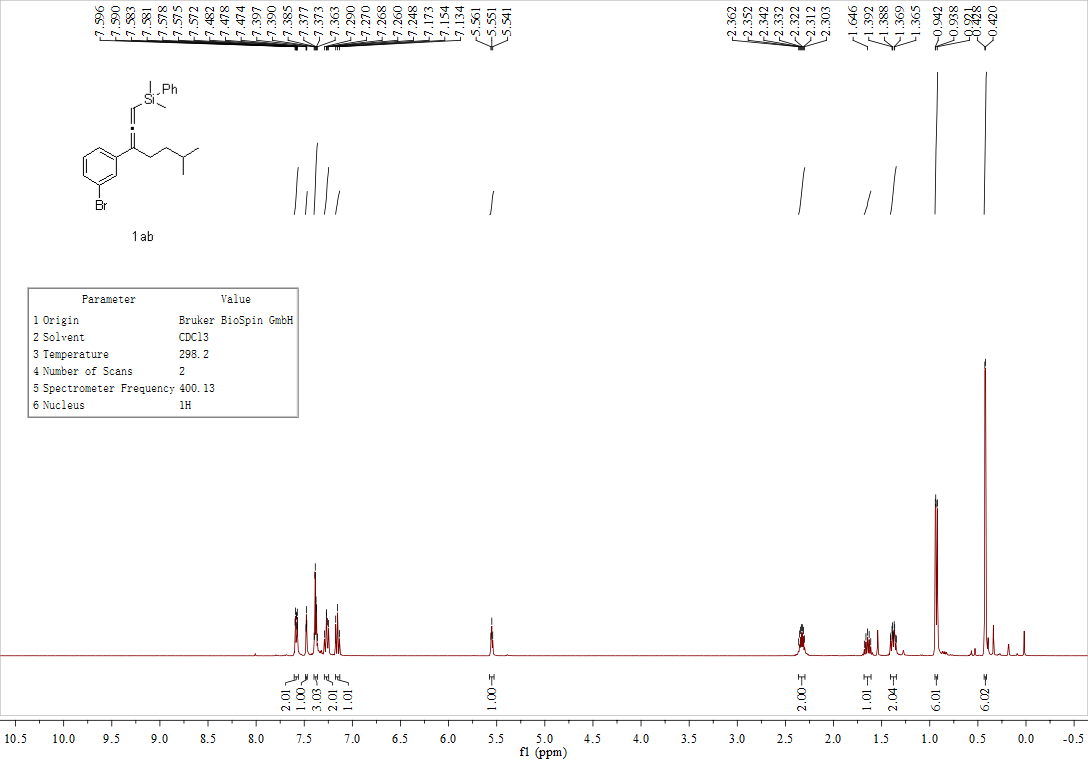


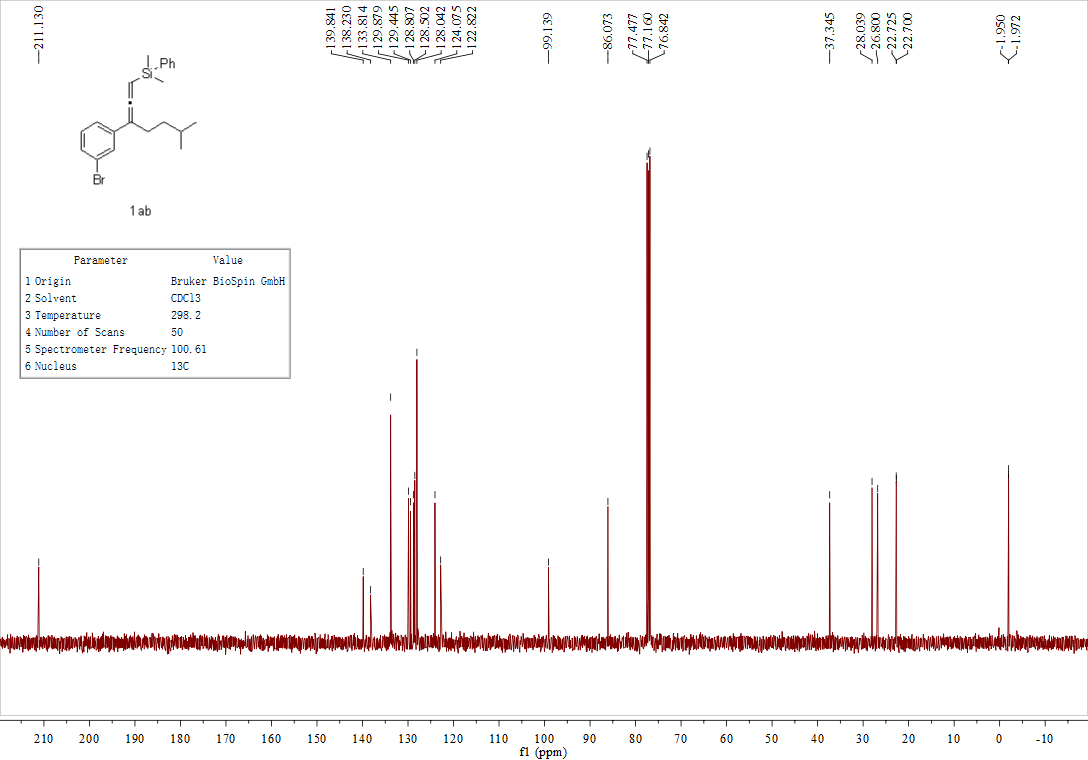


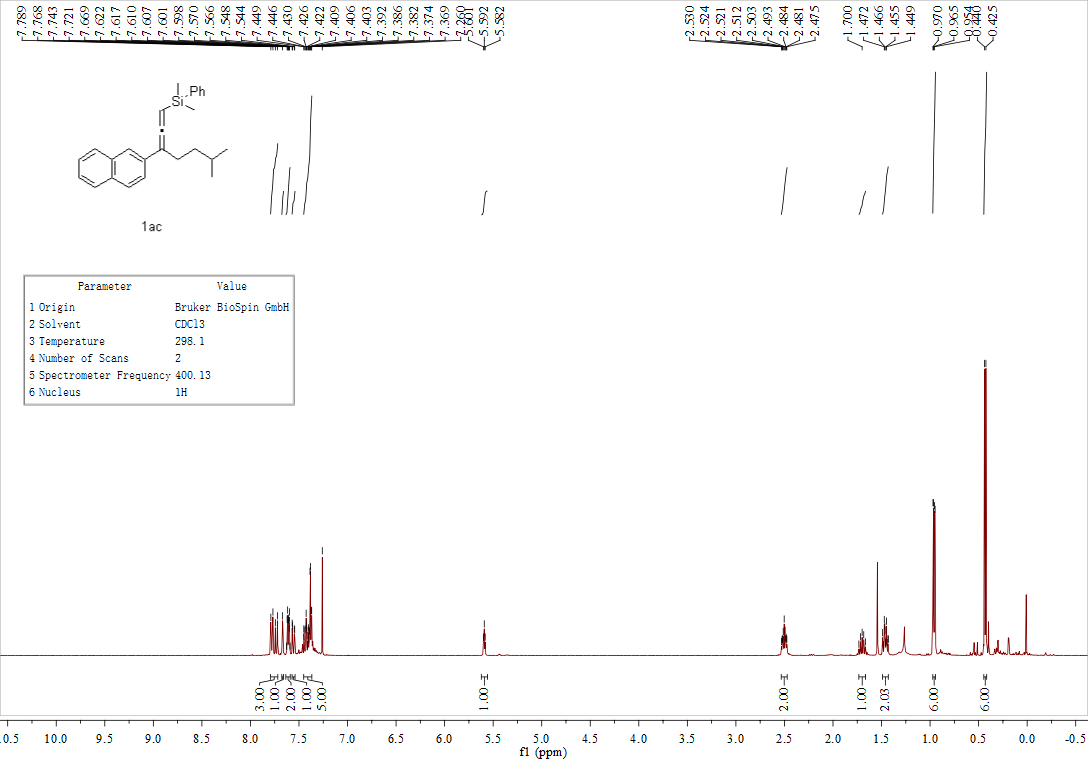


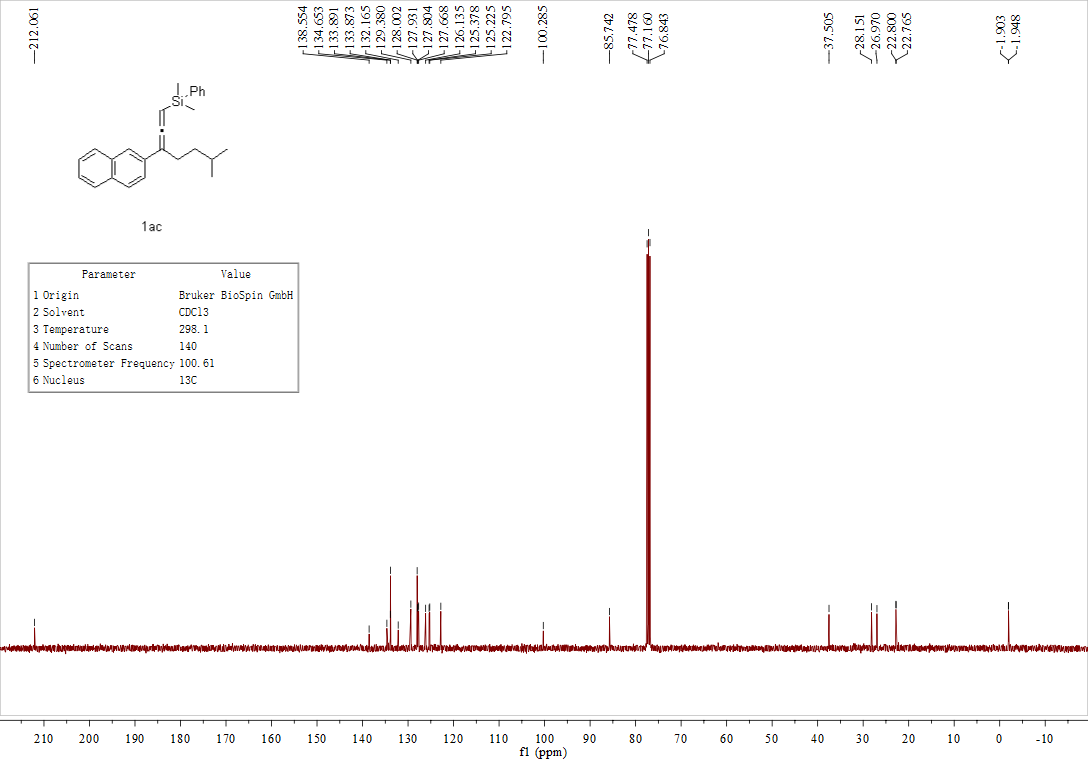


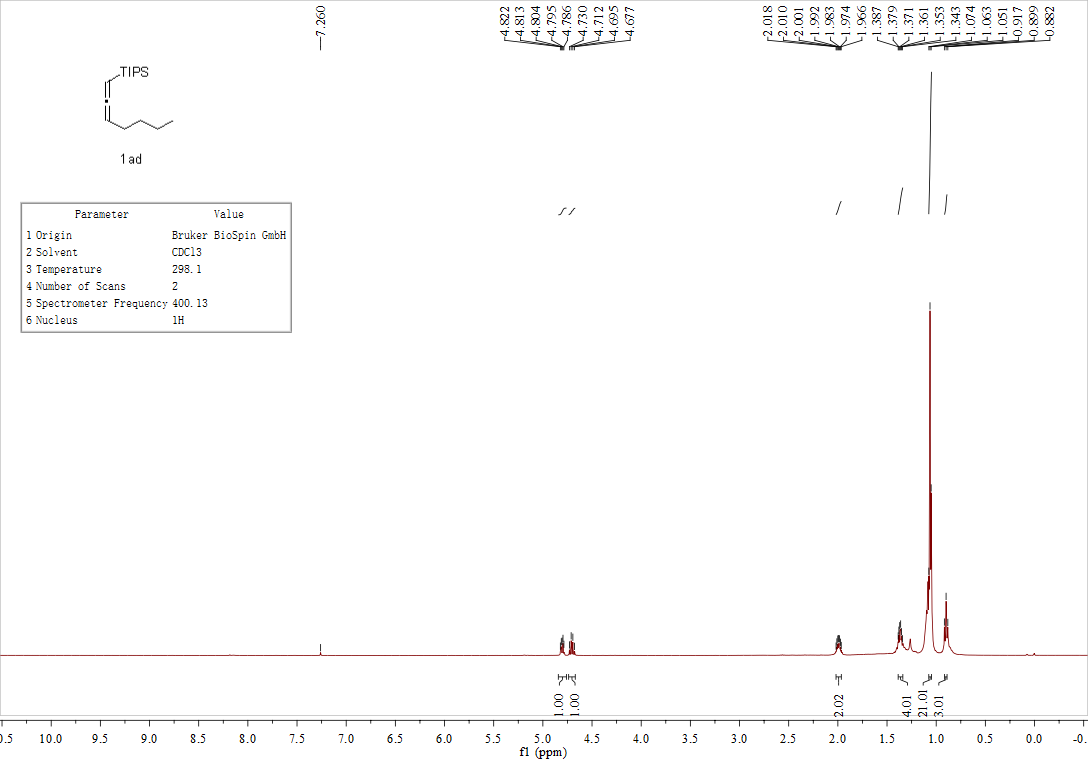


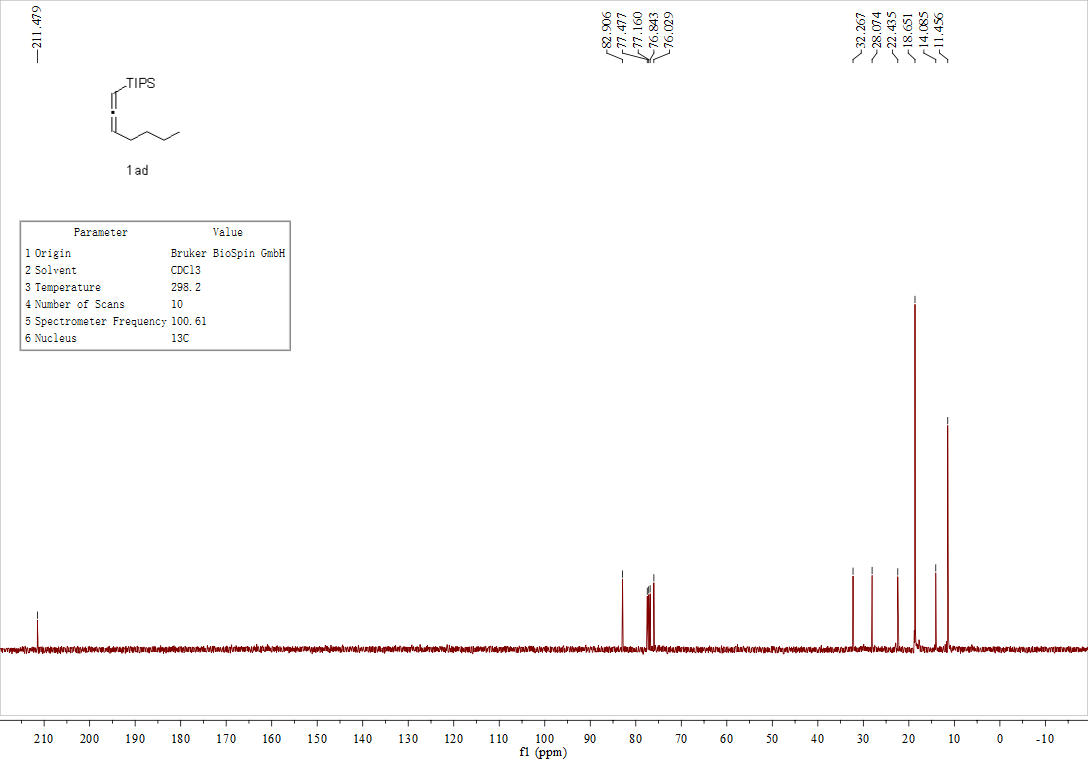


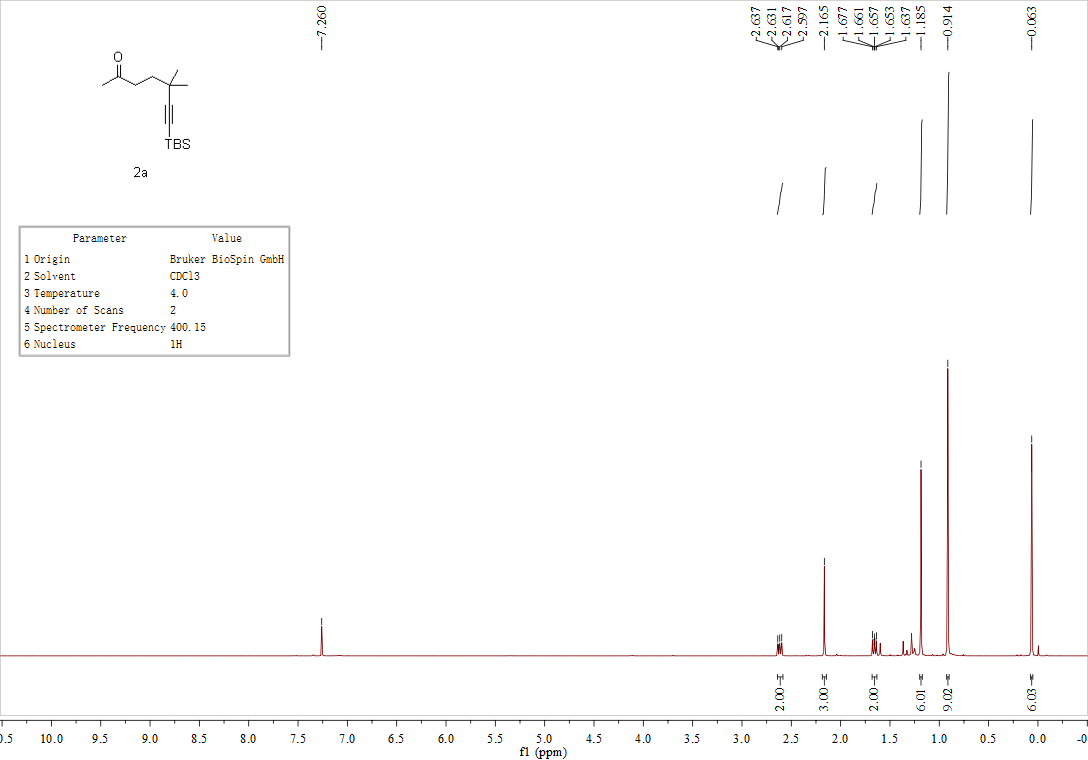


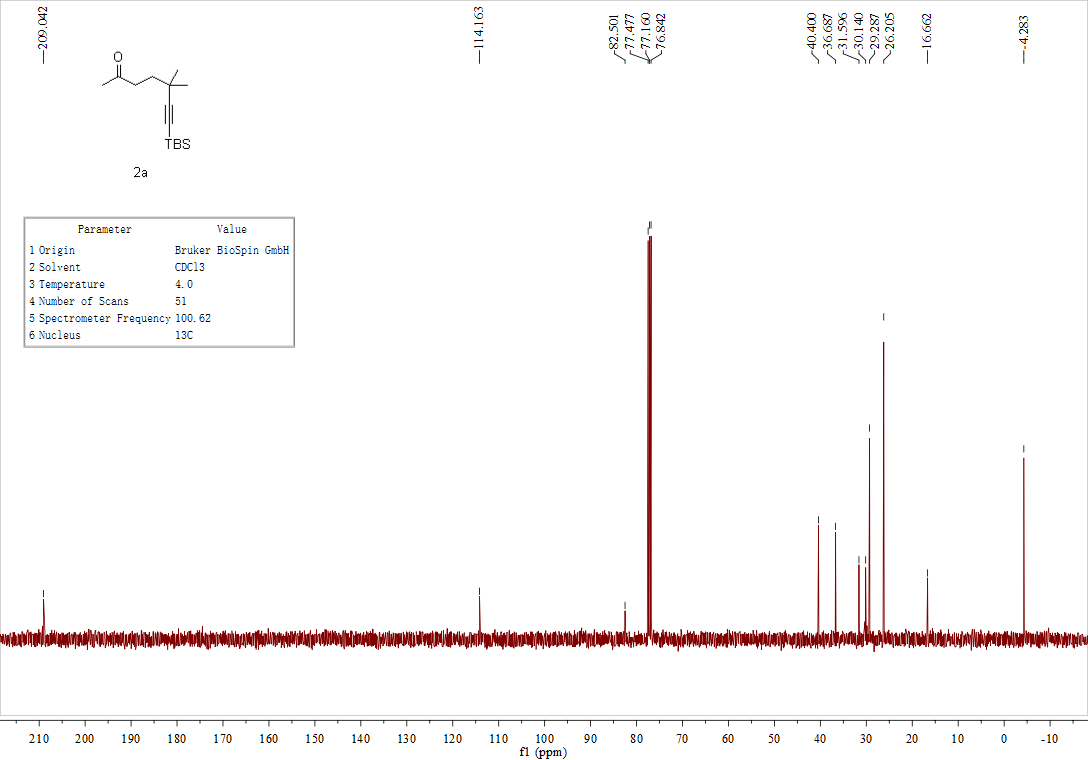


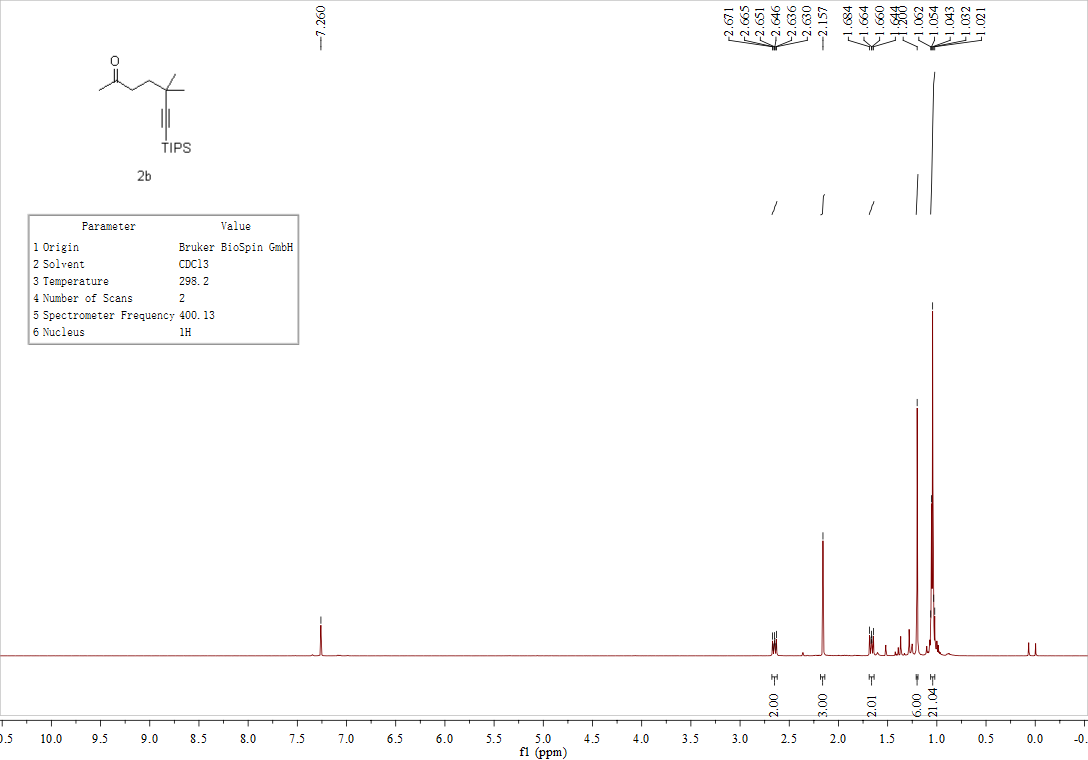


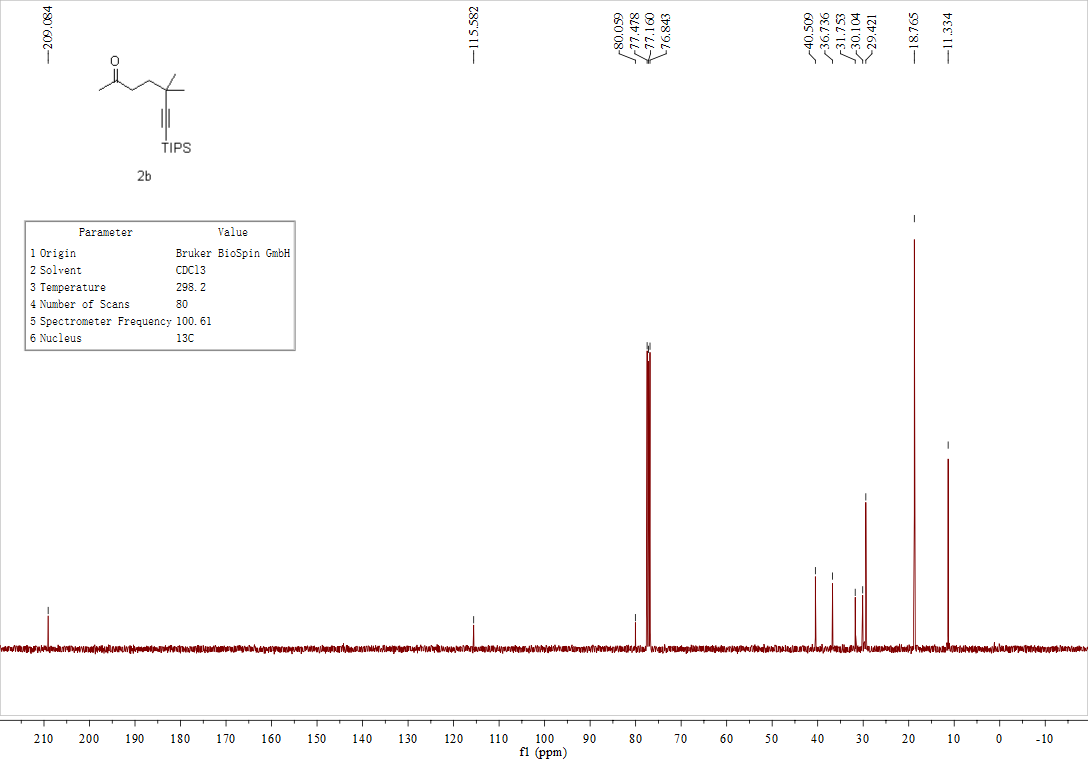


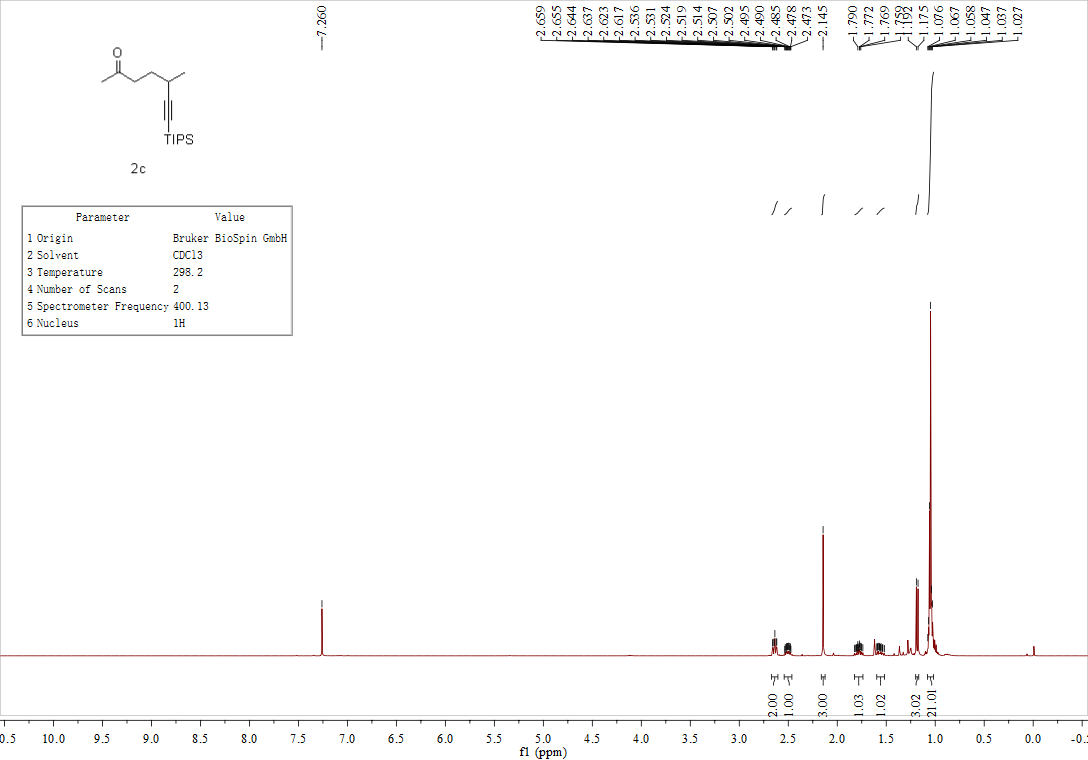


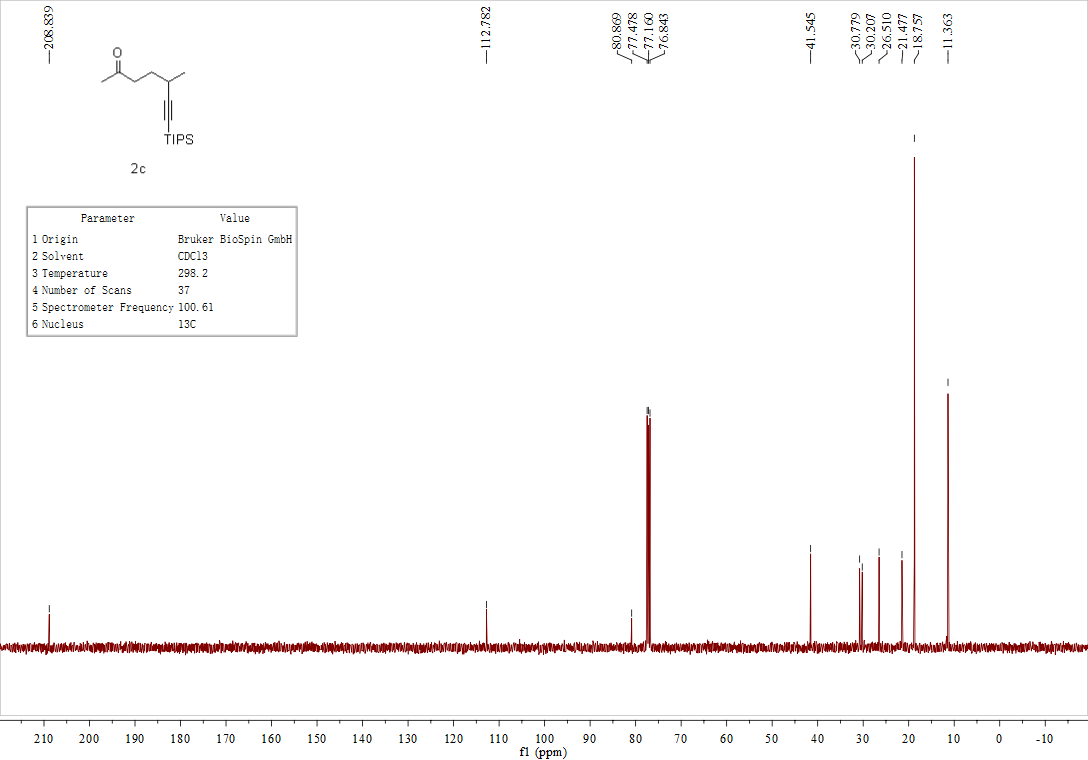


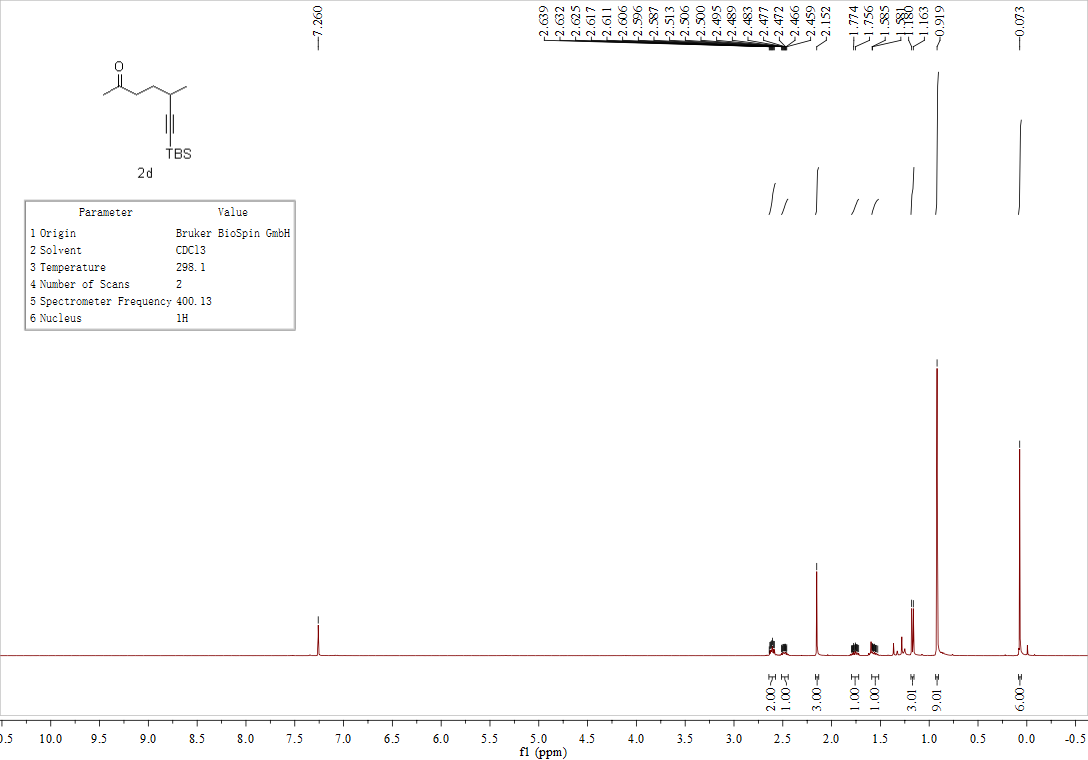


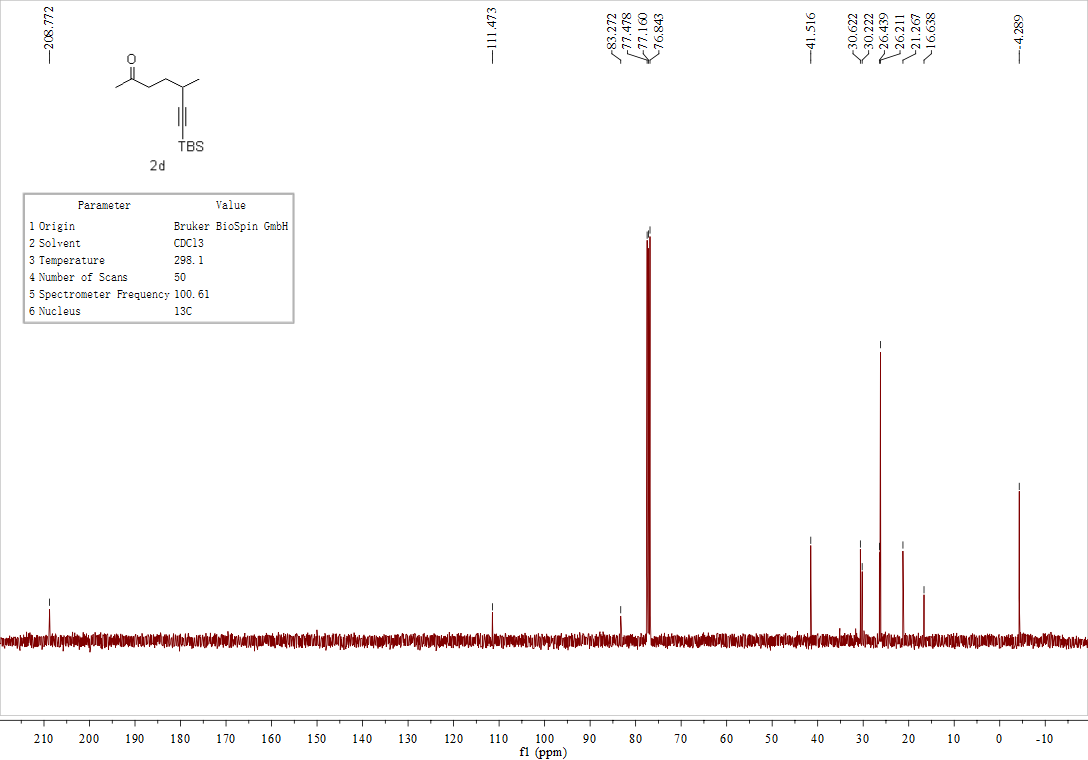


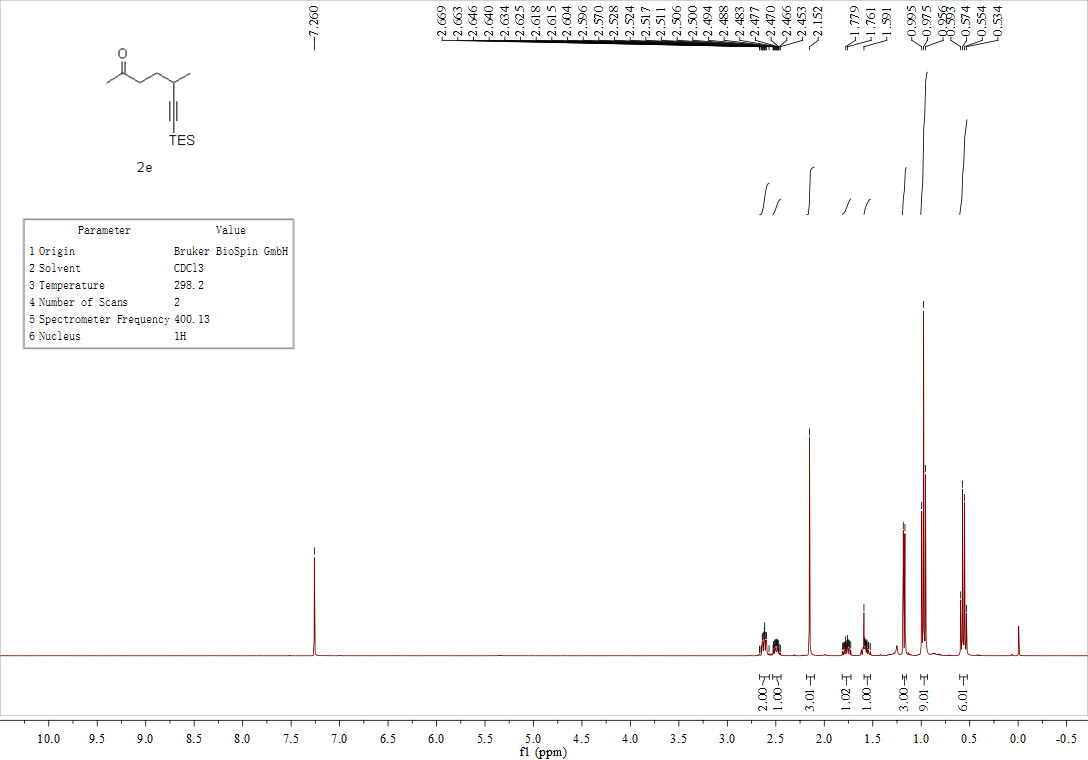


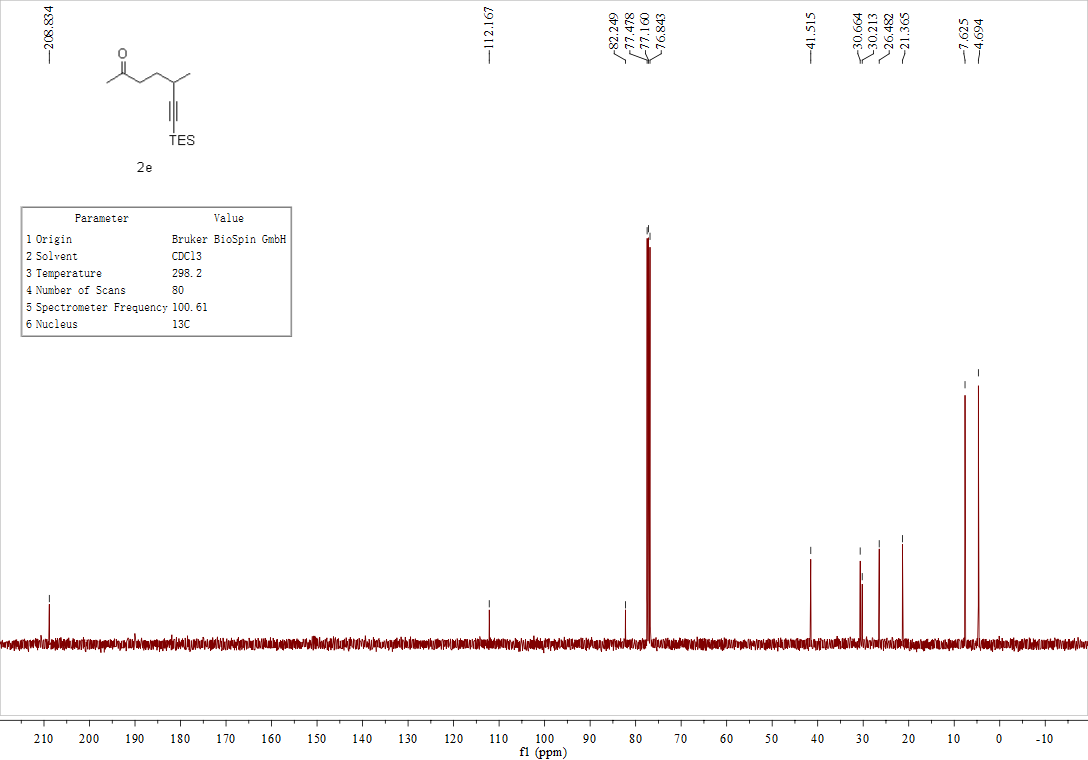


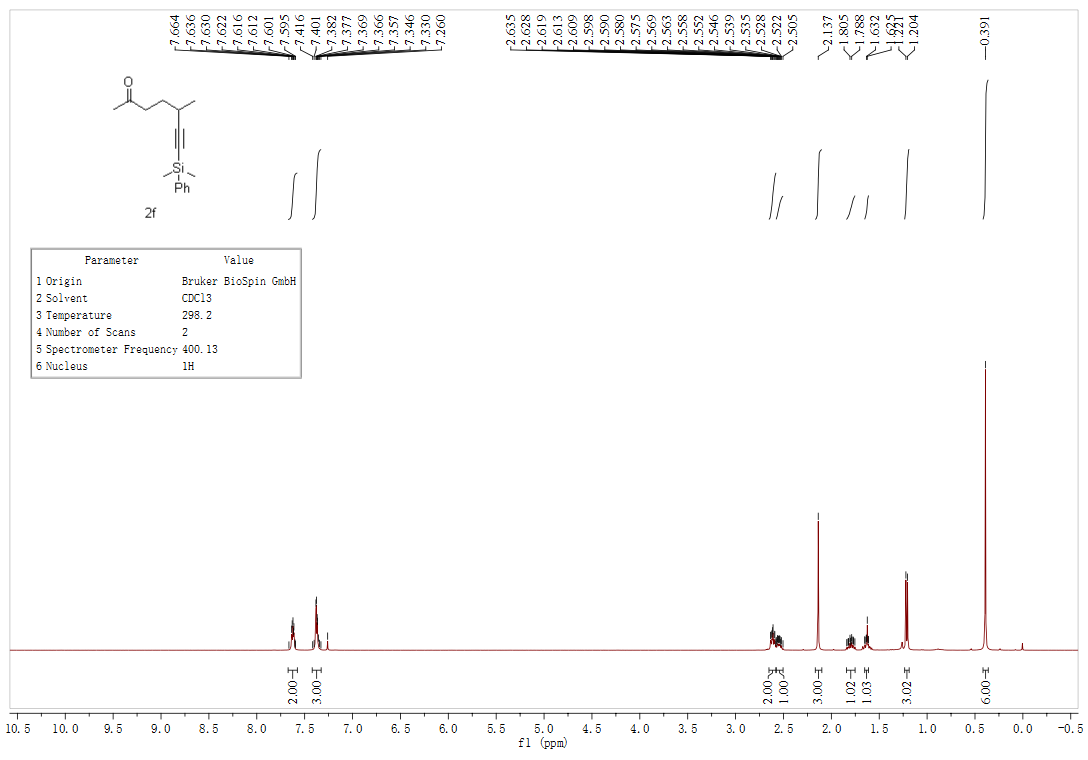


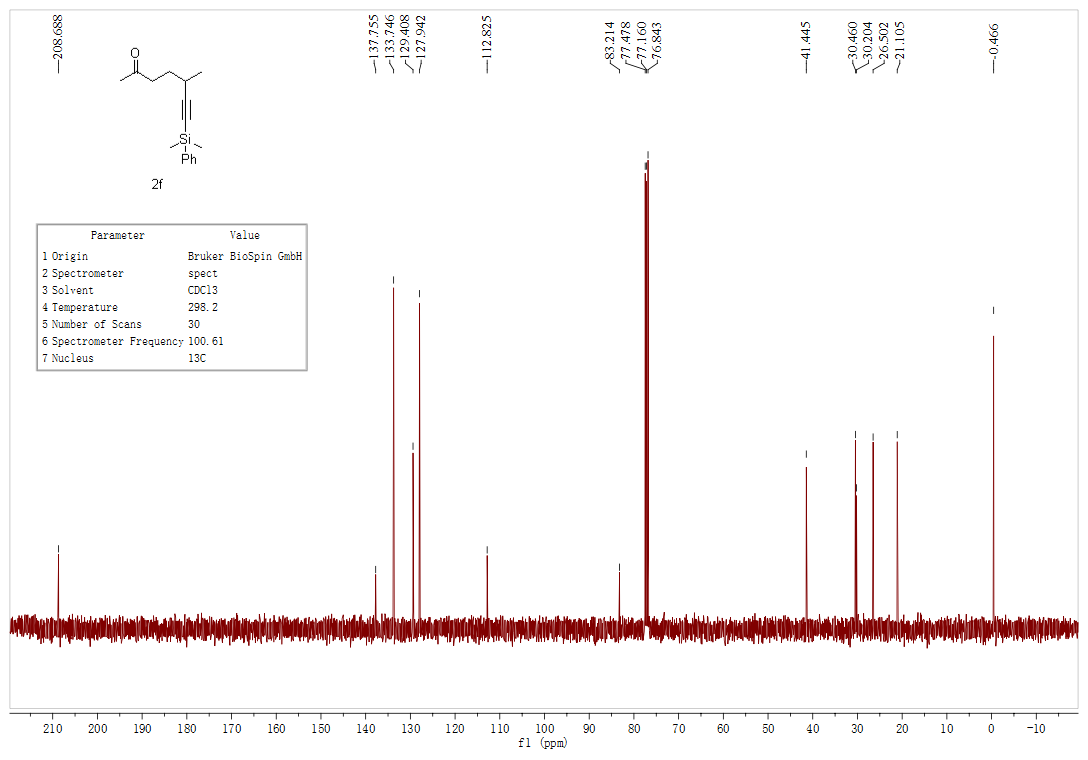


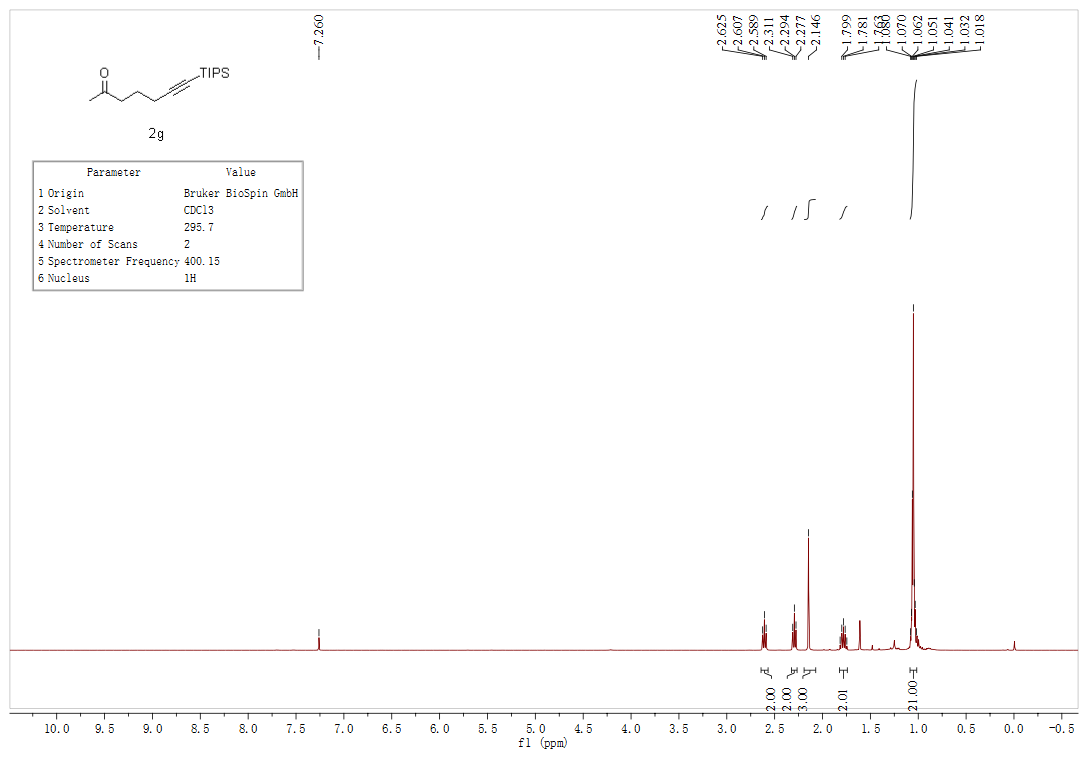


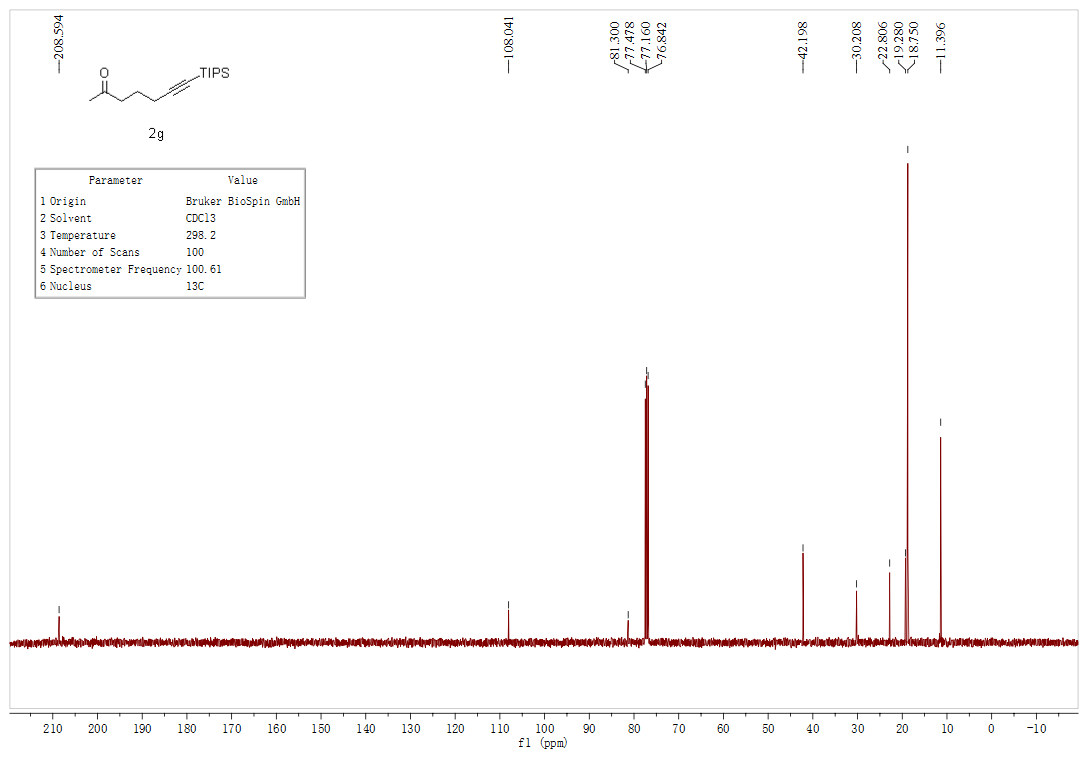


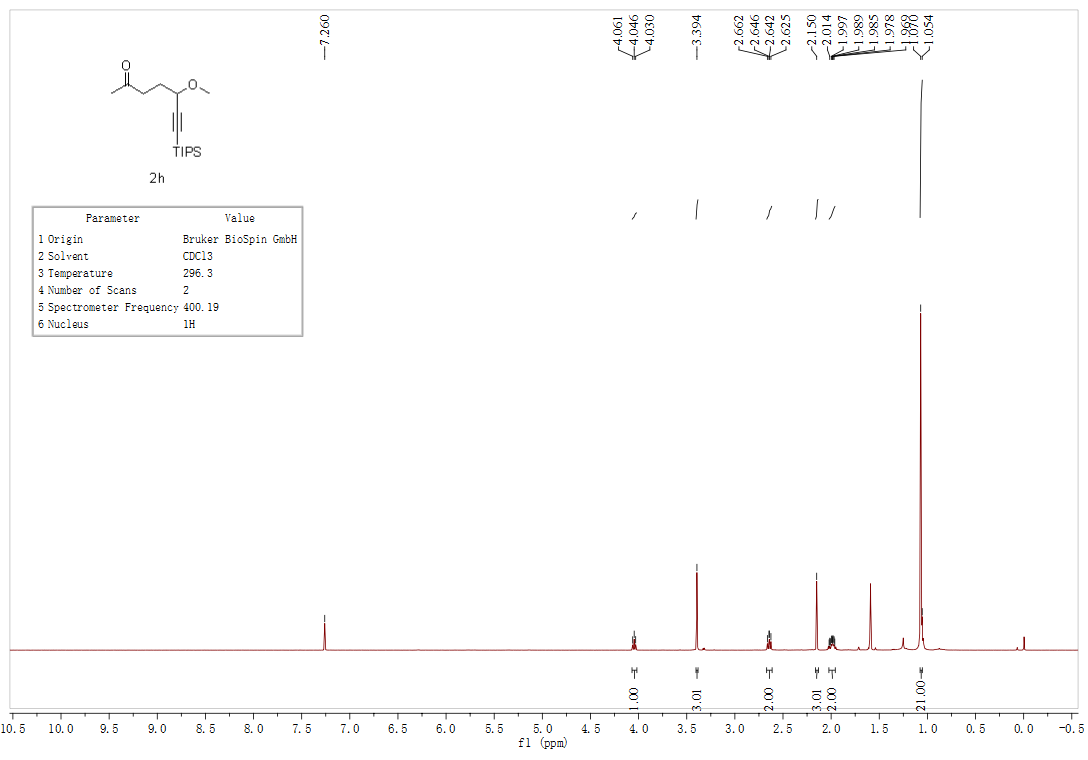


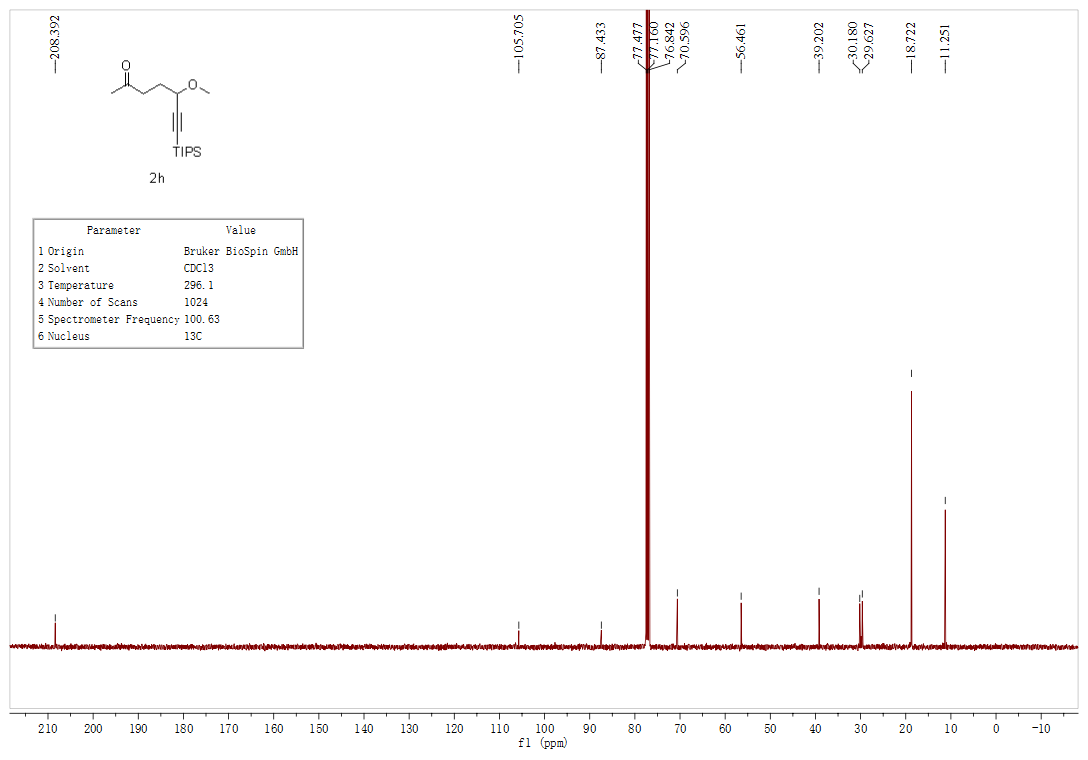


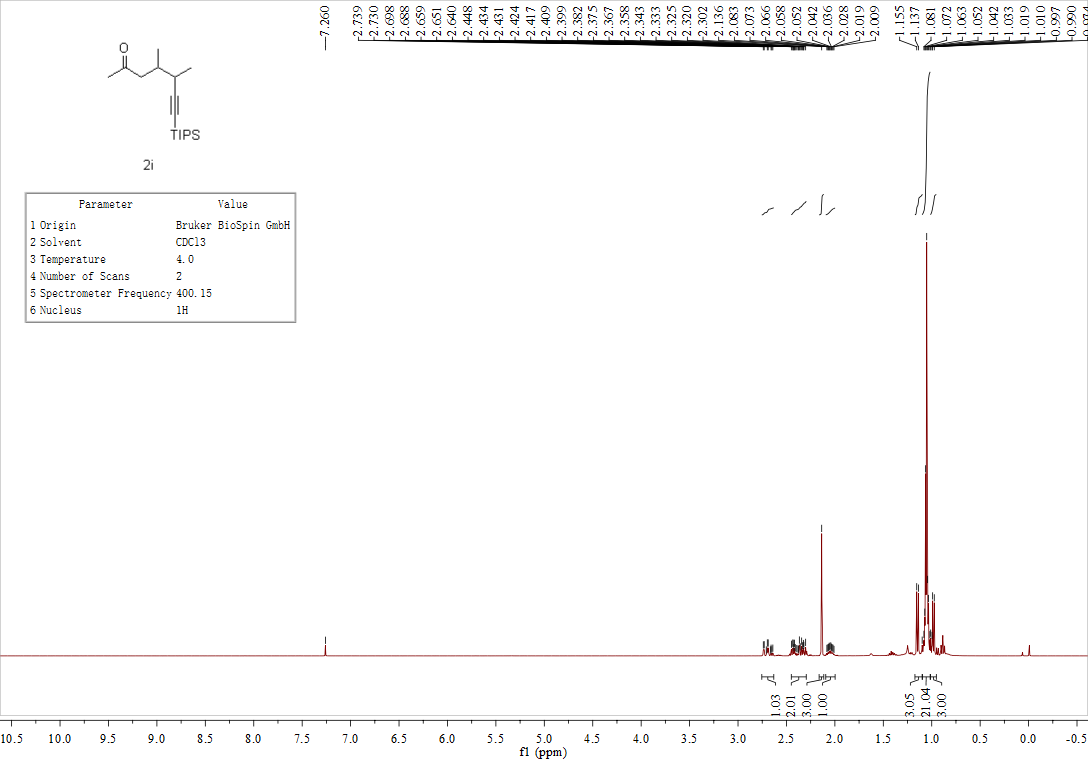


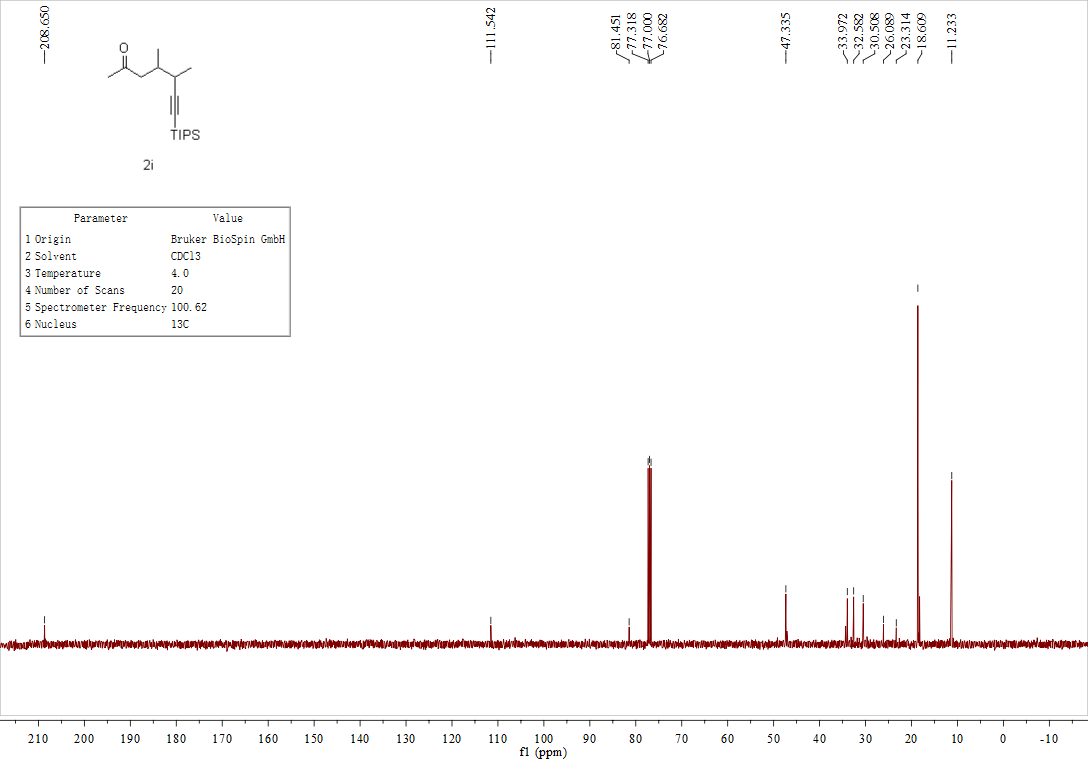


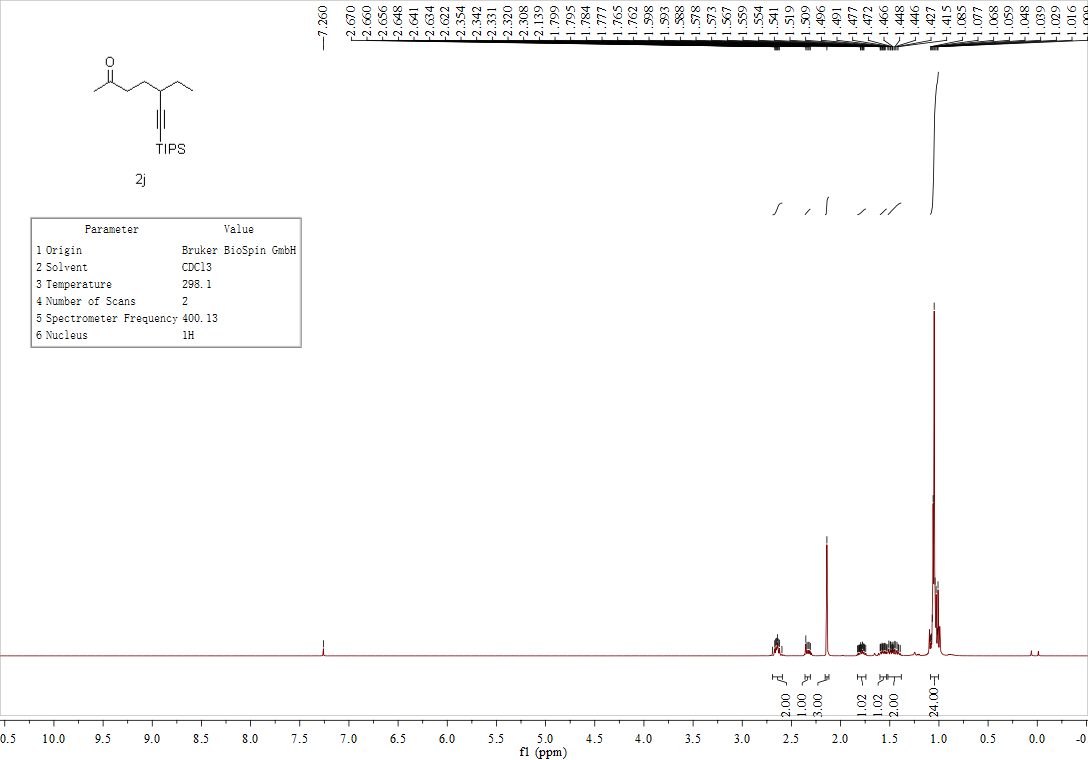


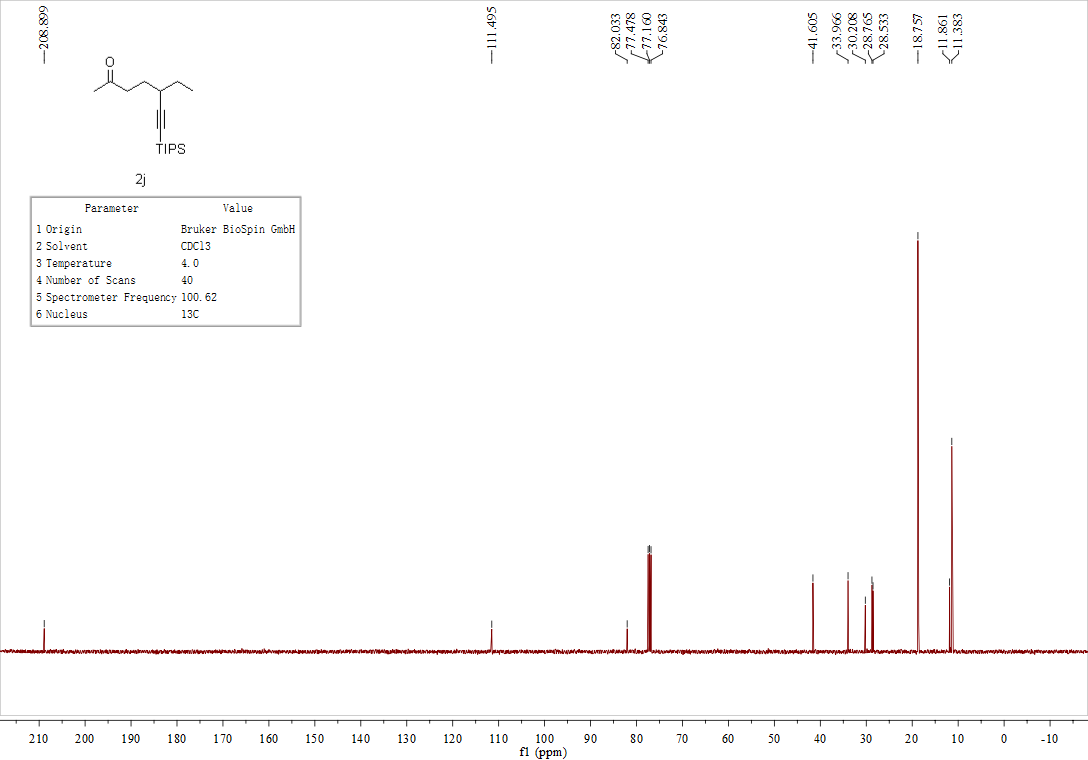


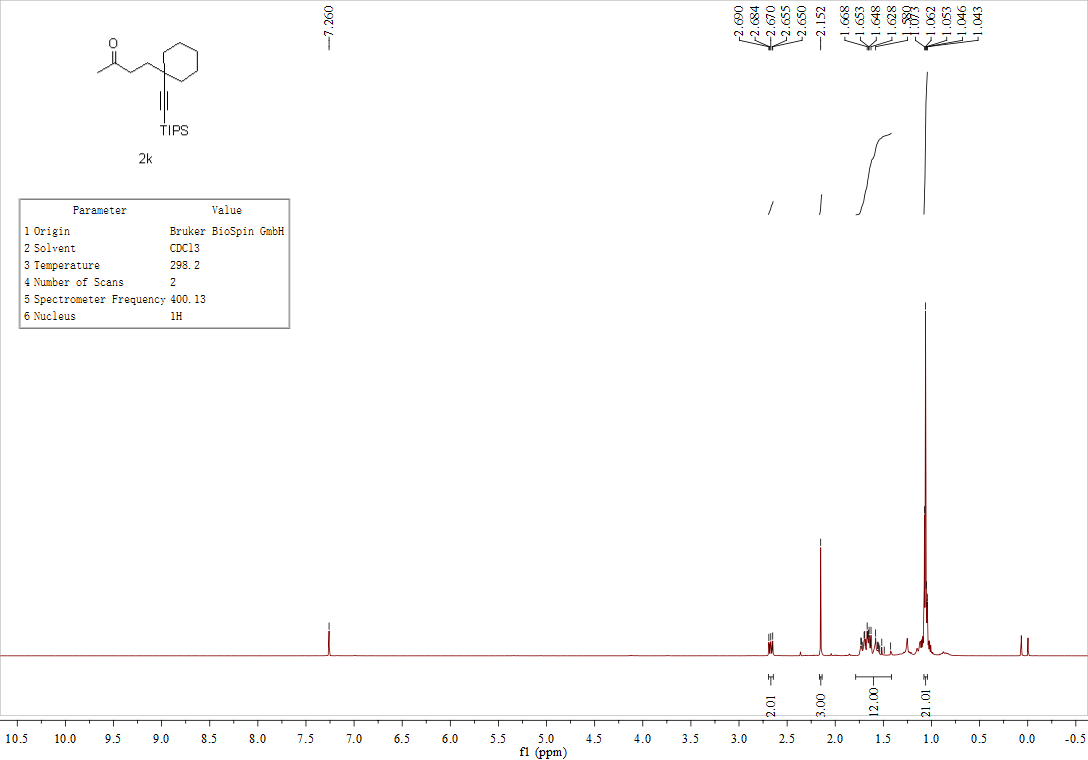


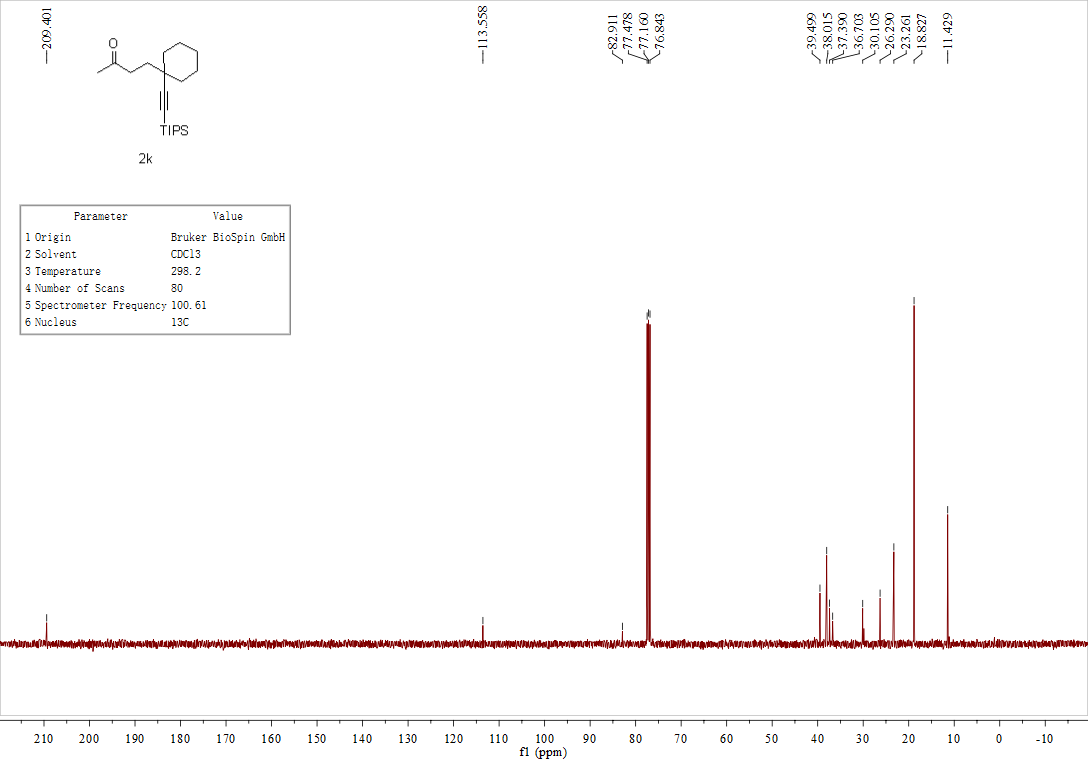


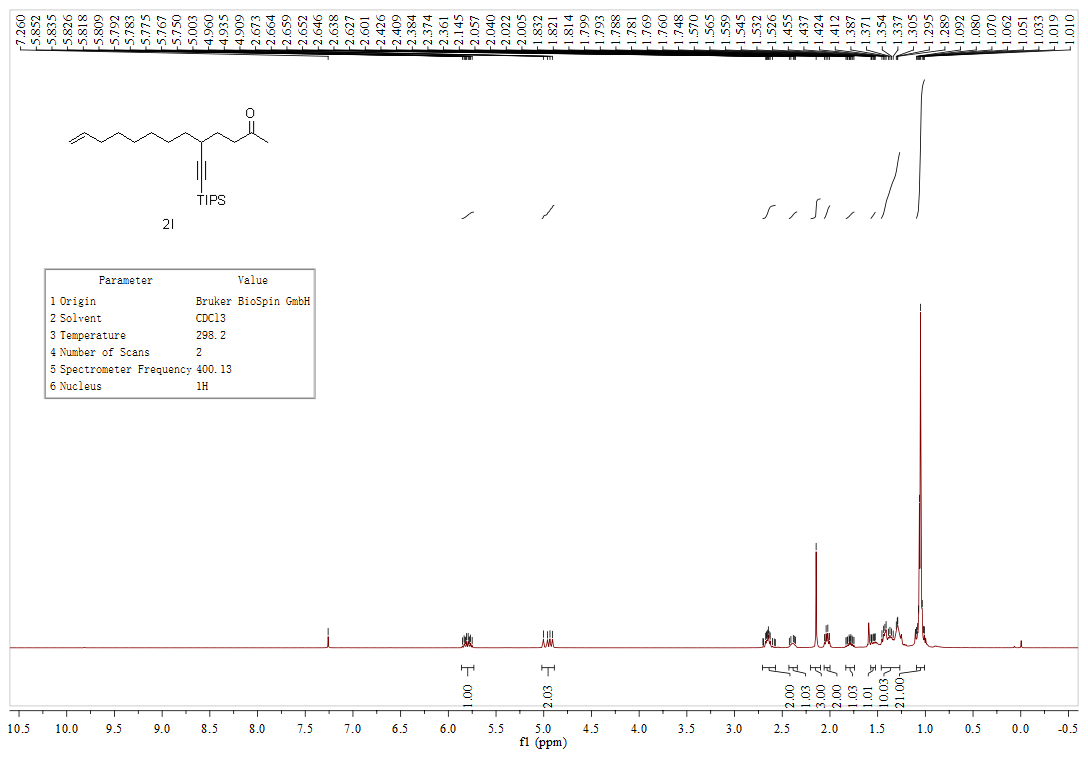


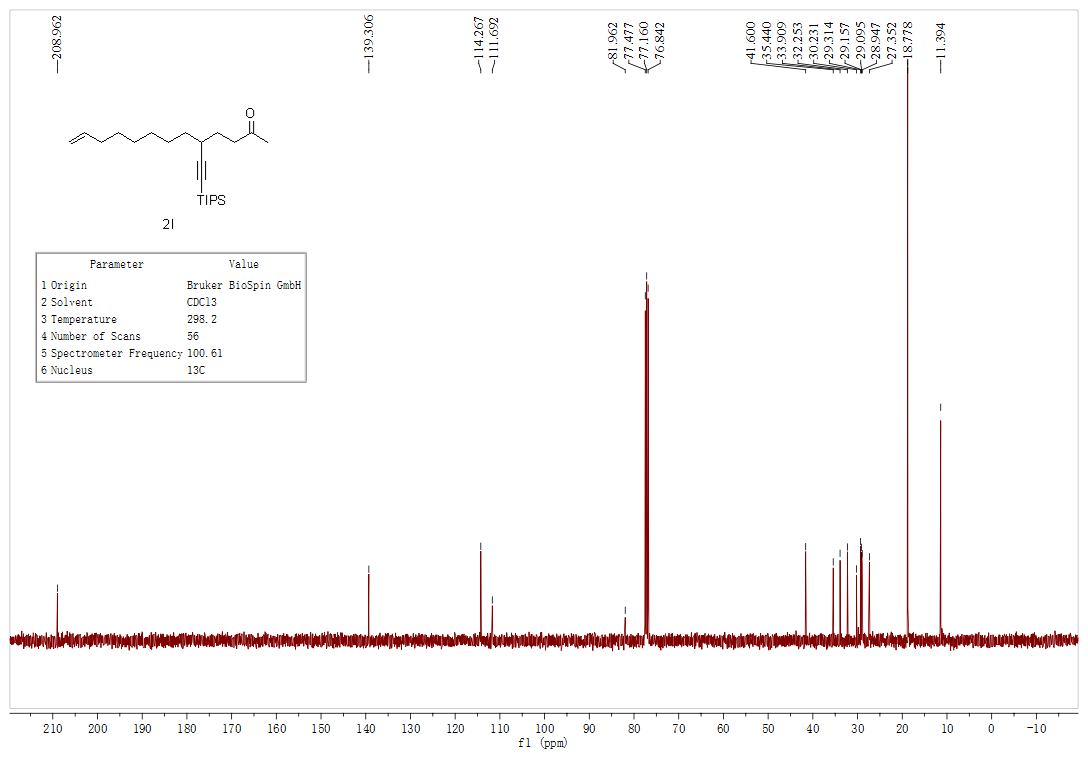


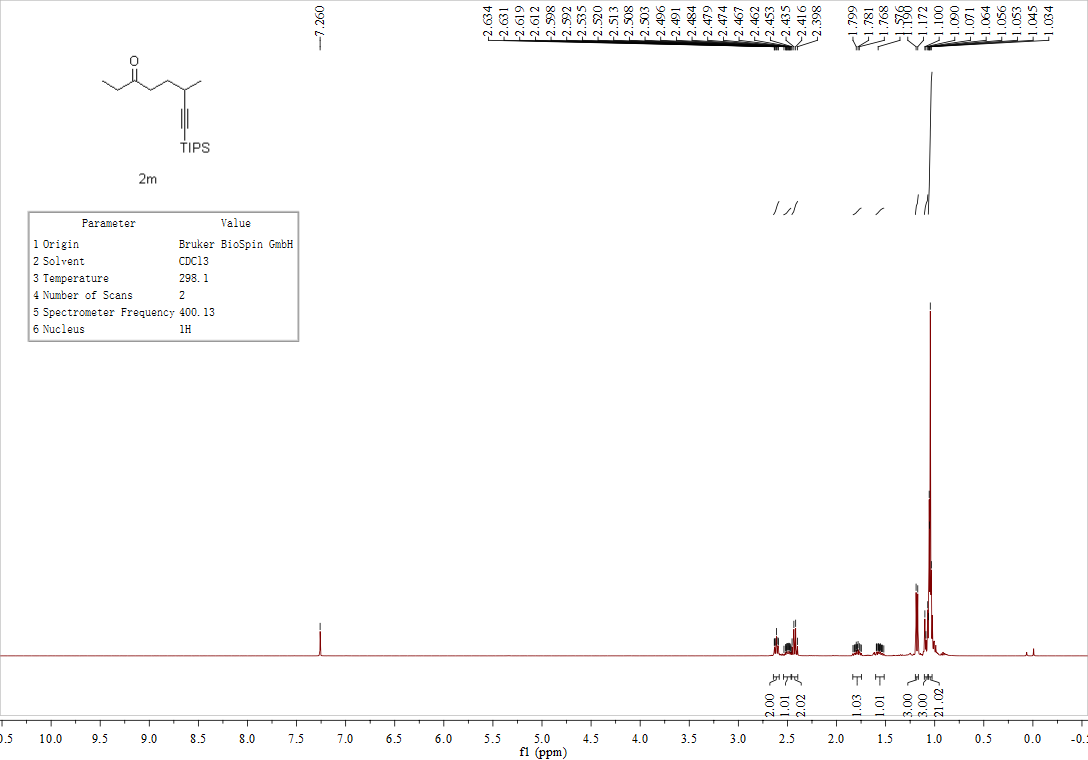


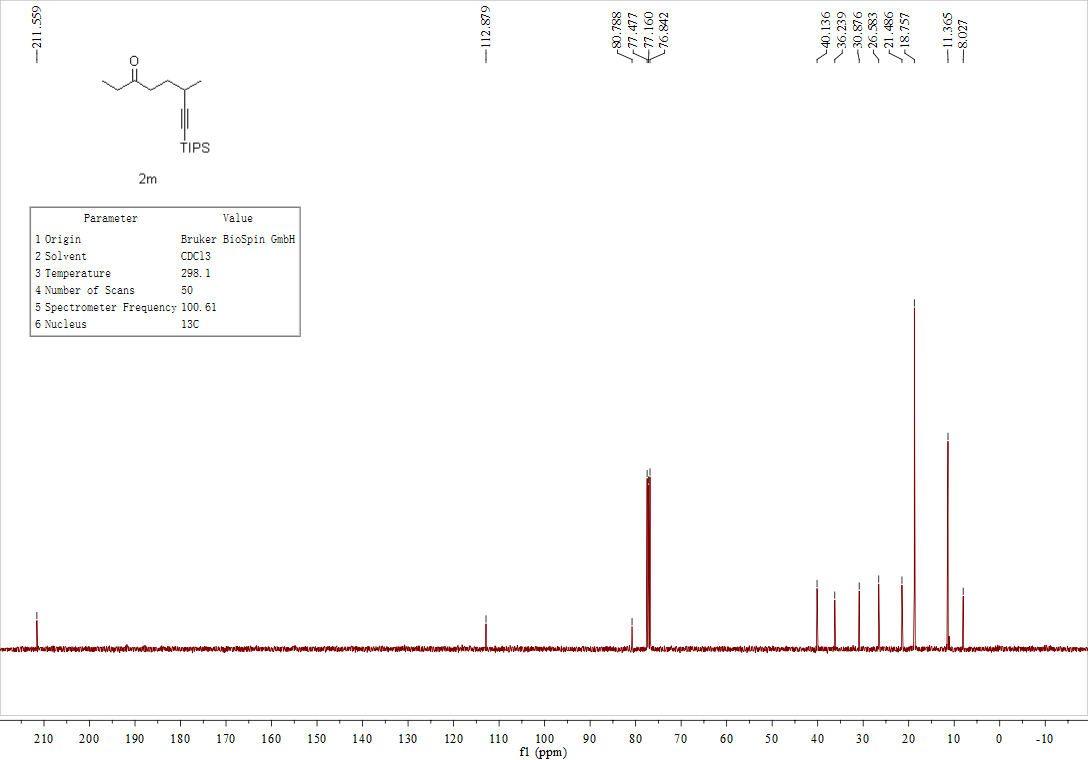


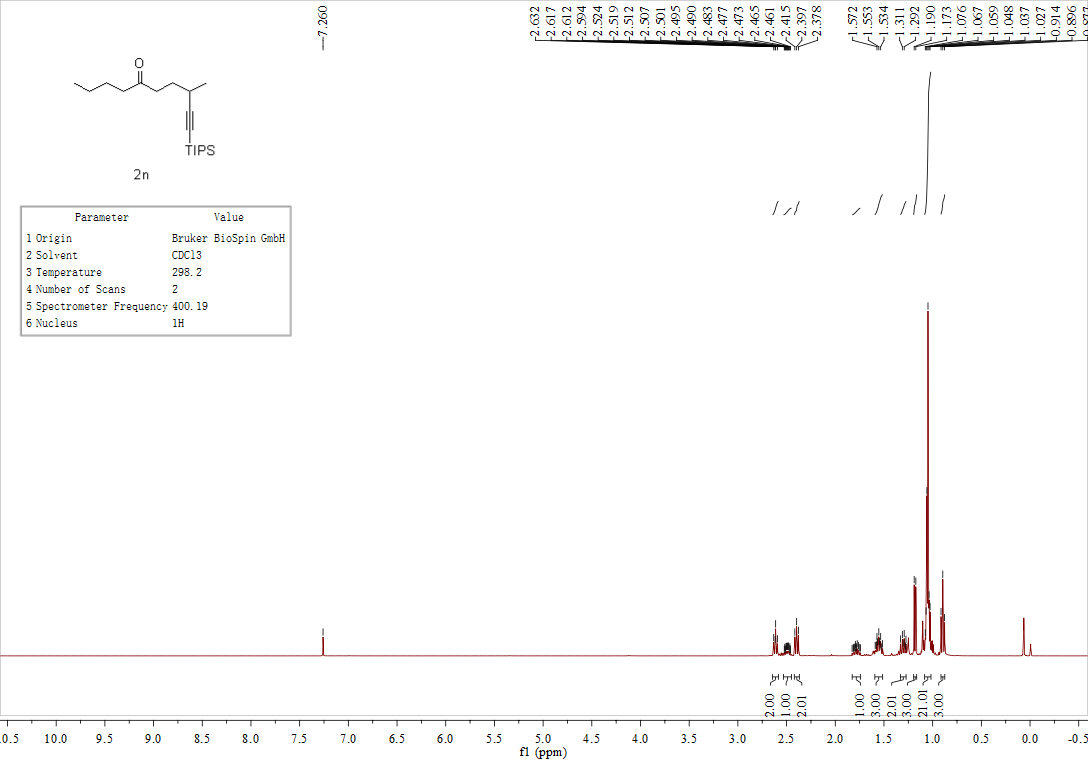


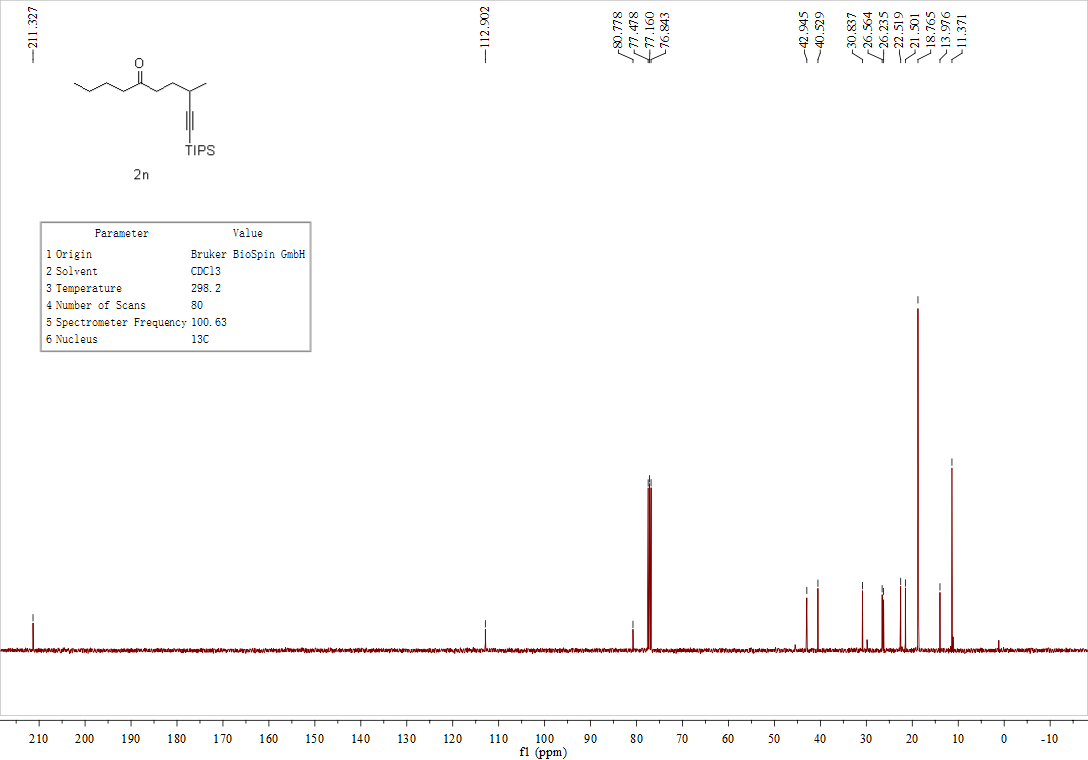


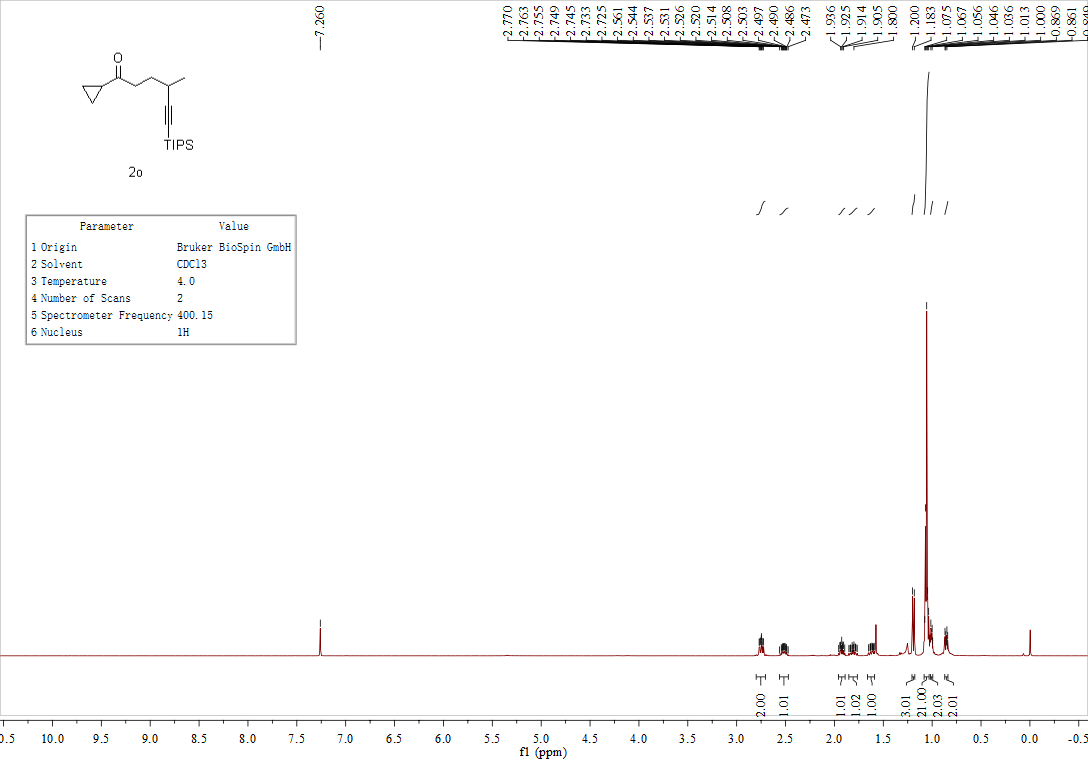


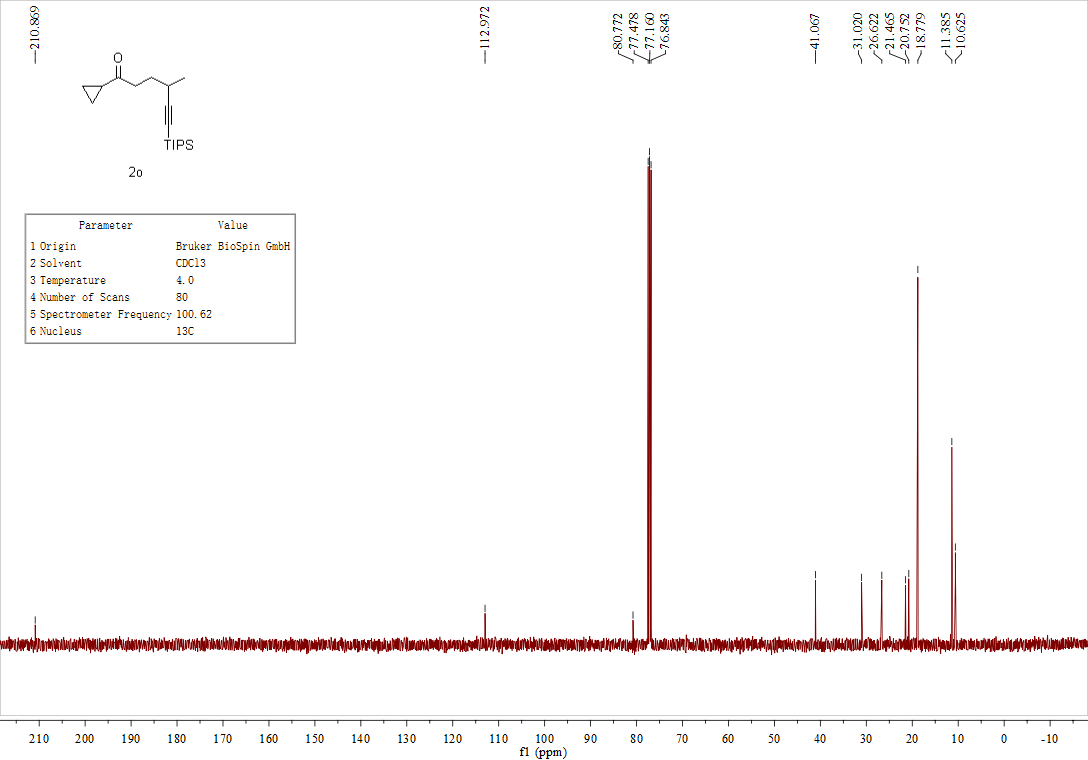


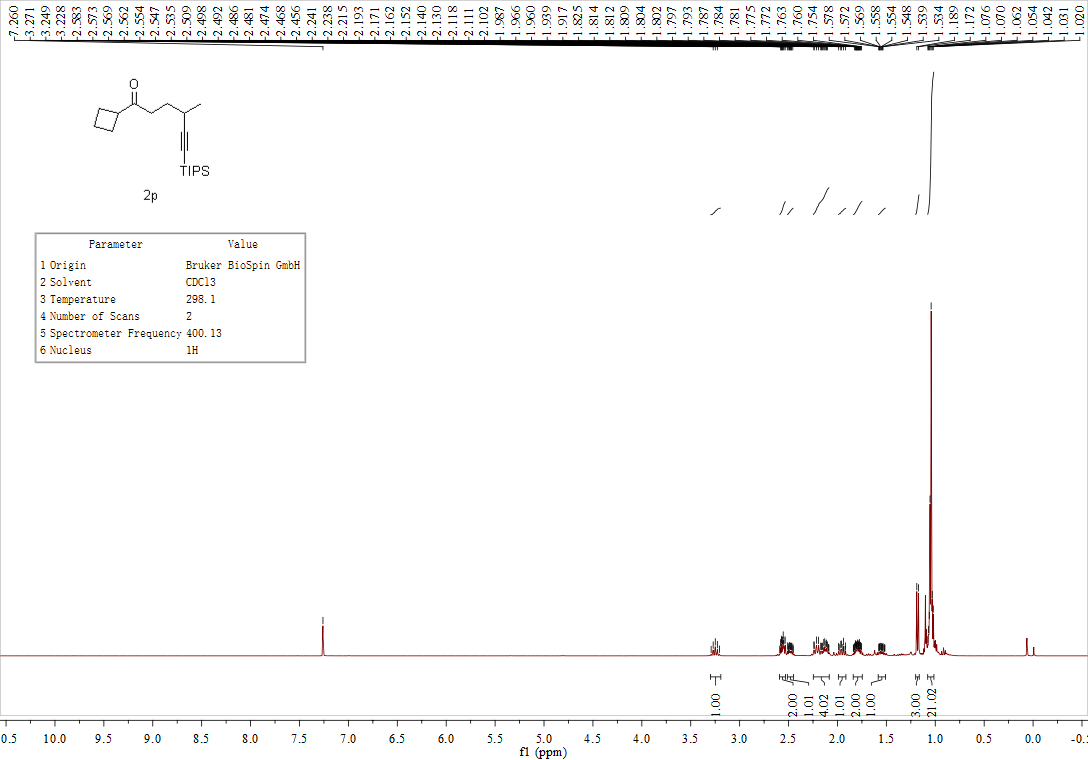


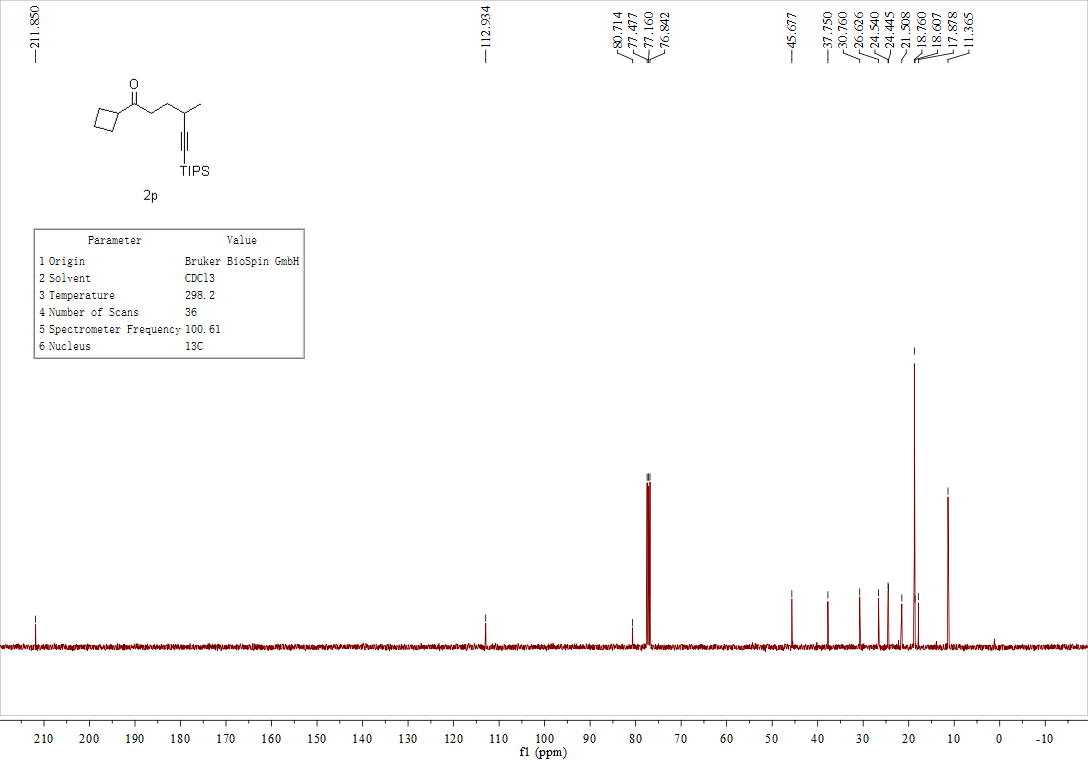


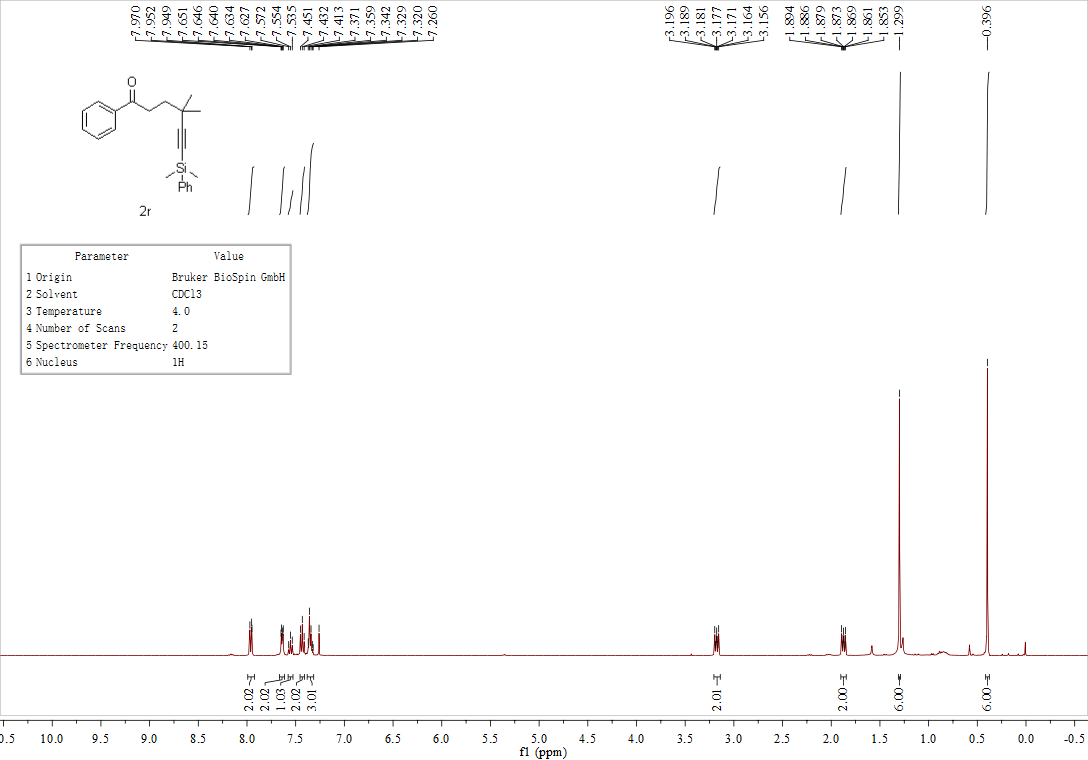


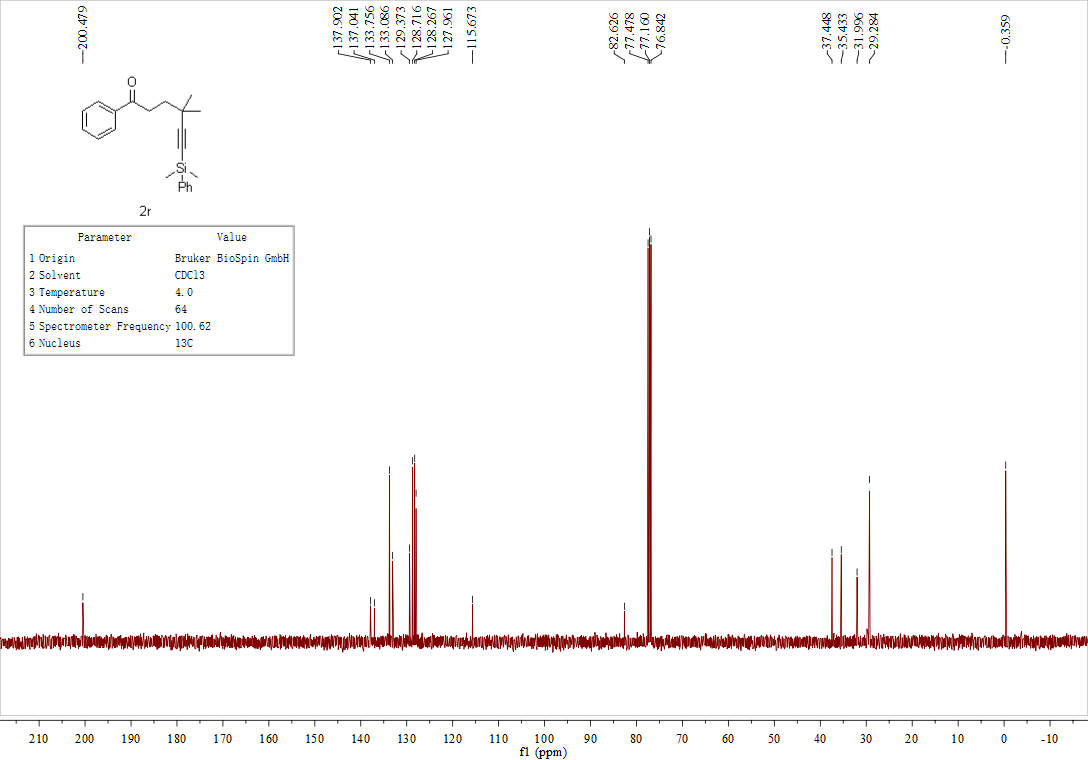


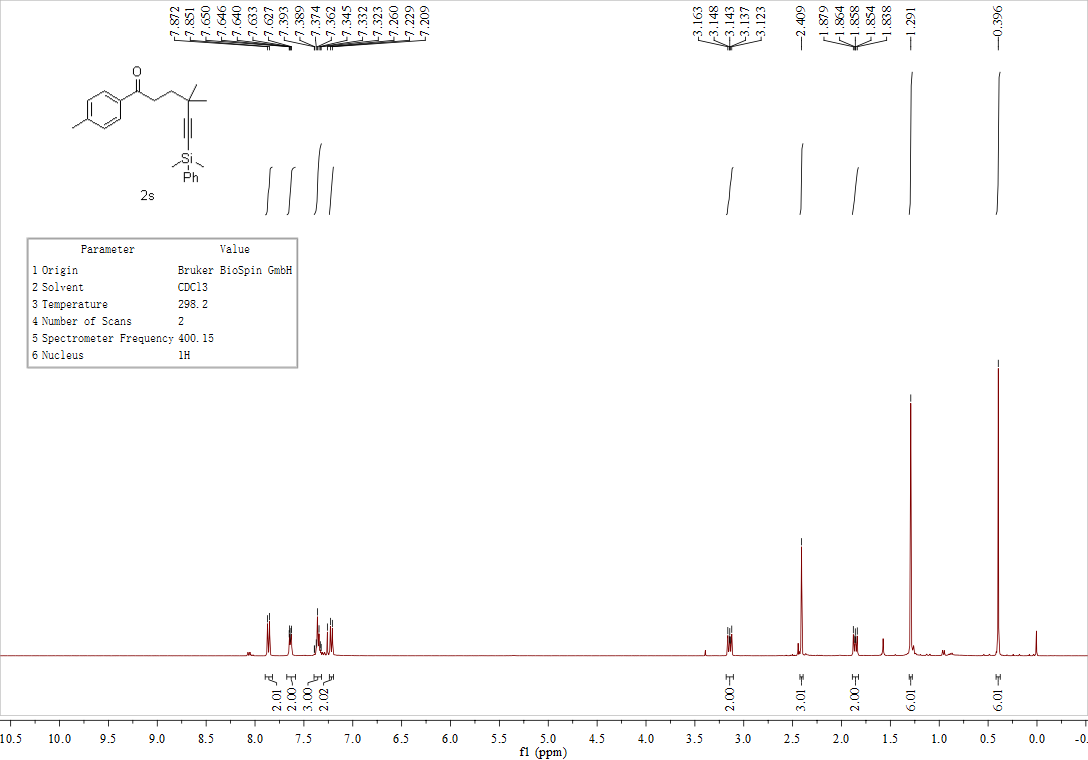


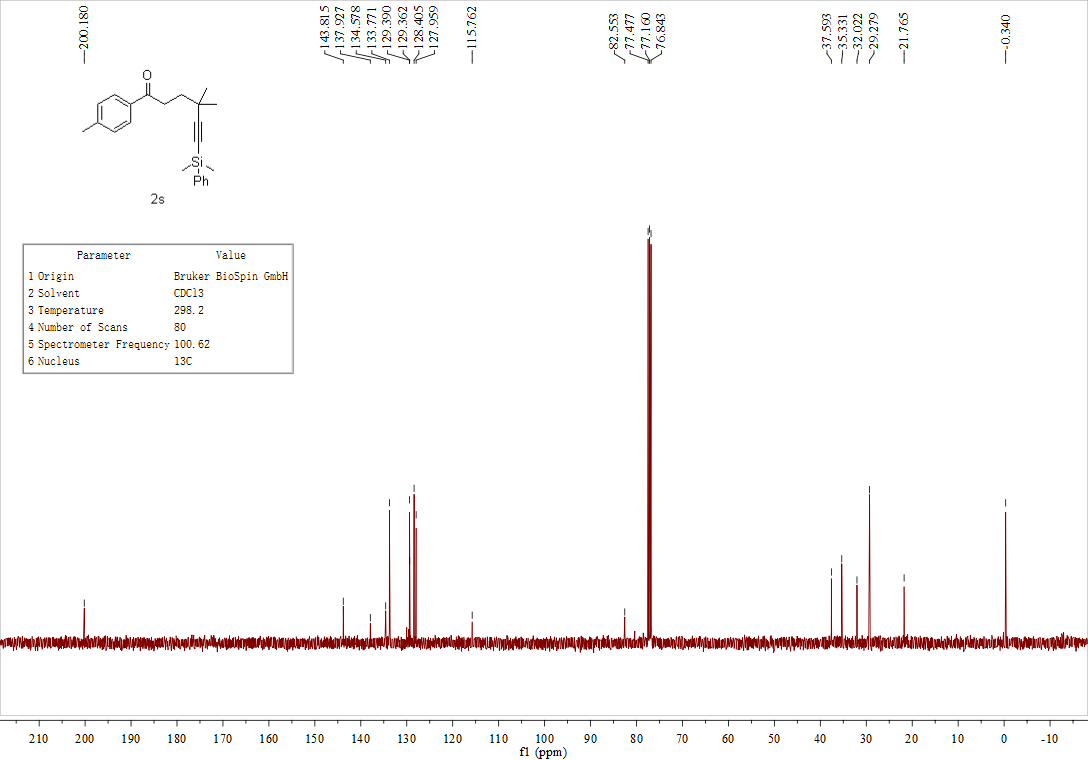


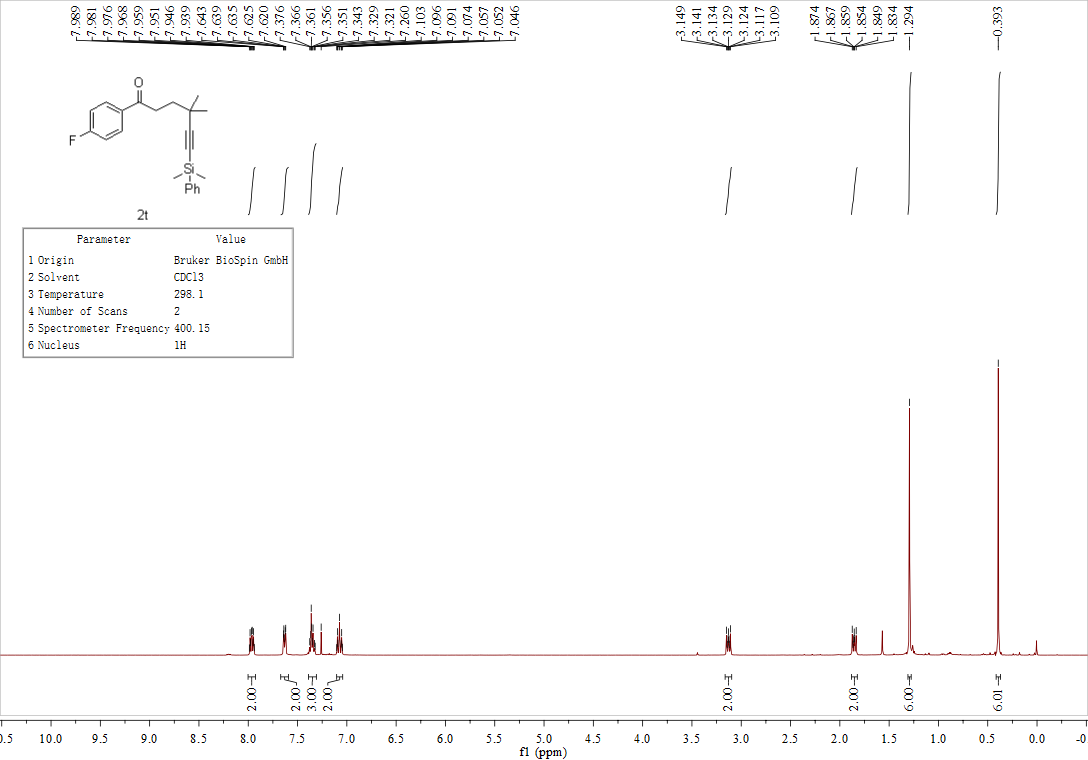


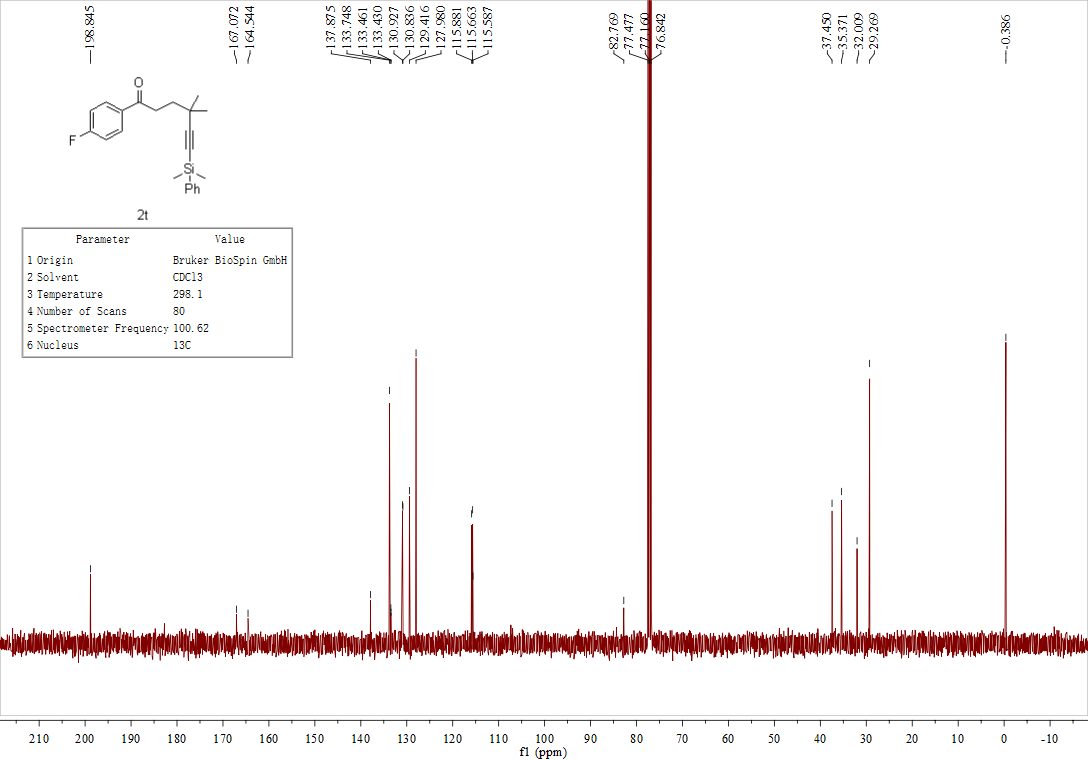

Supplement: Supplementary file 1 [file 9c0caf36b098a601074d52d0.docx]
